# Supplementary material for: Analysis of hormone receptor status in primary and recurrent breast cancer via data mining pathology reports
Source: publisher site journal article supplement (doi:10.1515/med-2019-0013), 2019-01-01
Supplement: Supplementary file 1 [file med-2019-0013_sm.pdf]

## SUPPLEMENTARY DATA

Supplementary data 1: Immunohistochemical study results of all 3806 breast cancer cases.

| Pathology_Number | Diagnosis                  | ER positivity | ER percentage | PR positivity | PR percentage | Her-2 score | Primary or Recurrent |
|------------------|----------------------------|---------------|---------------|---------------|---------------|-------------|----------------------|
| 201300283        | invasive ductal carcinoma  | positive      | 40            | positive      | 98            | 0           | Primary              |
| 201300284        | invasive ductal carcinoma  | negative      | 0             | negative      | 0             | 0           | Primary              |
| 201300285        | mucinous carcinoma         | positive      | 70            | positive      | 70            | 0           | Primary              |
| 201300479        | invasive ductal carcinoma  | negative      | 0             | negative      | 0             | 0           | Primary              |
| 201300720        | invasive ductal carcinoma  | negative      | 0             | negative      | 0             | 0           | Primary              |
| 201300747        | invasive ductal carcinoma  | negative      | 0             | negative      | 0             | 0           | Primary              |
| 201300875        | invasive ductal carcinoma  | positive      | 100           | positive      | 100           | 0           | Primary              |
| 201300977        | invasive ductal carcinoma  | positive      | 80            | positive      | 35            | 0           | Primary              |
| 201301070        | invasive ductal carcinoma  | negative      | 0             | negative      | 0             | 2           | Primary              |
| 201301210        | invasive ductal carcinoma  | negative      | 0             | negative      | 0             | 0           | Primary              |
| 201301227        | invasive ductal carcinoma  | positive      | 5             | negative      | 0             | 2           | Primary              |
| 201301293        | invasive ductal carcinoma  | positive      | 80            | positive      | 75            | 0           | Primary              |
| 201301294        | invasive ductal carcinoma  | None          | None          | positive      | 5             | 0           | Primary              |
| 201301295        | invasive ductal carcinoma  | negative      | 0             | negative      | 0             | 0           | Primary              |
| 201301333        | mucinous carcinoma         | positive      | 85            | positive      | 2             | 0           | Primary              |
| 201301430        | invasive ductal carcinoma  | positive      | 98            | positive      | 80            | 0           | Primary              |
| 201301609        | invasive ductal carcinoma  | positive      | 90            | positive      | 30            | 0           | Primary              |
| 201301615        | invasive ductal carcinoma  | negative      | 0             | negative      | 0             | 3           | Primary              |
| 201301664        | invasive ductal carcinoma  | positive      | 10            | positive      | 90            | 0           | Primary              |
| 201301766        | invasive ductal carcinoma  | negative      | 0             | negative      | 0             | 1           | Primary              |
| 201301787        | invasive ductal carcinoma  | None          | None          | None          | None          | None        | Primary              |
| 201301837        | invasive ductal carcinoma  | negative      | 0             | positive      | 4             | 0           | Primary              |
| 201301838        | invasive ductal carcinoma  | positive      | 85            | positive      | 95            | 0           | Primary              |
| 201301925        | invasive ductal carcinoma  | negative      | 0             | negative      | 0             | 1           | Primary              |
| 201301945        | invasive ductal carcinoma  | positive      | 100           | positive      | 150           | 0           | Primary              |
| 201302060        | invasive ductal carcinoma  | positive      | 95            | positive      | 70            | 0           | Primary              |
| 201302101        | invasive ductal carcinoma  | positive      | 80            | positive      | 70            | 2           | Primary              |
| 201302248        | invasive ductal carcinoma  | negative      | 0             | negative      | 0             | 2           | Primary              |
| 201302251        | invasive lobular carcinoma | negative      | 0             | negative      | 0             | 0           | Primary              |
| 201302257        | invasive ductal carcinoma  | positive      |               | negative      | 0             | 1           | Primary              |
| 201302463        | invasive ductal carcinoma  | None          | None          | None          | None          | None        | Primary              |
| 201302485        | invasive mammary carcinoma | positive      | 100           | positive      | 100           | 0           | Primary              |
| 201302489        | invasive ductal carcinoma  | positive      | 90            | positive      | 10            | 2           | Primary              |
| 201302547        | invasive ductal carcinoma  | positive      | 30            | negative      | 0             | 0           | Primary              |
| 201302599        | invasive ductal carcinoma  | negative      | 0             | negative      | 0             | 0           | Primary              |

| Pathology_Number | Diagnosis                        | ER positivity | ER percentage | PR positivity | PR percentage | Her-2 score | Primary or Recurrent |
|------------------|----------------------------------|---------------|---------------|---------------|---------------|-------------|----------------------|
| 201302862        | invasive ductal carcinoma        | negative      | 0             | negative      | 0             | 0           | Primary              |
| 201302863        | invasive ductal carcinoma        | positive      | 95            | positive      | 5             | 3           | Primary              |
| 201302864        | invasive ductal carcinoma        | positive      | 20            | positive      | 60            | 0           | Primary              |
| 201302920        | invasive ductal carcinoma        | positive      | 98            | positive      |               | 0           | Primary              |
| 201302921        | invasive ductal carcinoma        | positive      | 55            | positive      | 90            | 0           | Primary              |
| 201303011        | invasive ductal carcinoma        | negative      | 0             | negative      | 0             | 0           | Primary              |
| 201303012        | invasive mammary carcinoma       | positive      | 100           | positive      | 95            | 0           | Primary              |
| 201303015        | invasive ductal carcinoma        | negative      | 0             | negative      | 0             | 2           | Primary              |
| 201303030        | encapsulated papillary carcinoma | positive      | 98            | positive      | 100           | None        | Primary              |
| 201303097        | invasive ductal carcinoma        | positive      | 95            | positive      | 10            | 1           | Primary              |
| 201303098        | invasive ductal carcinoma        | positive      | 10            | negative      | 0             | 0           | Primary              |
| 201303162        | invasive ductal carcinoma        | negative      | 0             | negative      | 0             | 2           | Primary              |
| 201303163        | mucinous carcinoma               | positive      | 85            | positive      | 98            | 0           | Primary              |
| 201303165        | invasive ductal carcinoma        | positive      | 65            | positive      | 70            | 0           | Primary              |
| 201303179        | mucinous carcinoma               | positive      | 98            | positive      | 98            | 0           | Primary              |
| 201303421        | invasive lobular carcinoma       | positive      | 40            | negative      | 0             | 0           | Primary              |
| 201303422        | invasive ductal carcinoma        | positive      | 98            | positive      | 5             | 0           | Primary              |
| 201303566        | invasive ductal carcinoma        | negative      | 0             | negative      | 0             | 2           | Primary              |
| 201303601        | invasive ductal carcinoma        | positive      |               | positive      |               | 0           | Primary              |
| 201303622        | invasive ductal carcinoma        | positive      | 100           | positive      | 140           | 0           | Primary              |
| 201303747        | invasive ductal carcinoma        | negative      | 0             | negative      | 0             | 2           | Primary              |
| 201303749        | invasive ductal carcinoma        | positive      | 98            | negative      | 0             | 2           | Primary              |
| 201303750        | invasive ductal carcinoma        | negative      | 0             | negative      | 0             | 3           | Primary              |
| 201303753        | invasive mammary carcinoma       | negative      | 0             | negative      | 0             | 2           | Primary              |
| 201303936        | invasive ductal carcinoma        | positive      | 90            | positive      | 40            | 0           | Primary              |
| 201304000        | invasive lobular carcinoma       | negative      | 0             | negative      | 0             | 0           | Primary              |
| 201304001        | invasive ductal carcinoma        | positive      | 58            | negative      | 0             | 2           | Primary              |
| 201304057        | invasive ductal carcinoma        | positive      | 163           | positive      | 98            | 0           | Primary              |
| 201304083        | invasive cribriform carcinoma    | positive      | 100           | positive      | 100           | 0           | Primary              |
| 201304085        | invasive ductal carcinoma        | positive      | 95            | positive      | 15            | 2           | Primary              |
| 201304143        | invasive ductal carcinoma        | positive      | 85            | positive      | 15            | 0           | Primary              |
| 201304276        | invasive ductal carcinoma        | positive      | 118           | negative      | 0             | 1           | Primary              |
| 201304315        | invasive ductal carcinoma        | positive      | 60            | positive      | 22            | 0           | Primary              |
| 201304387        | invasive ductal carcinoma        | positive      | 15            | negative      | 0             | 0           | Primary              |
| 201304437        | invasive ductal carcinoma        | positive      | 100           | positive      | 95            | 0           | Primary              |
| 201304468        | invasive ductal carcinoma        | positive      | 95            | positive      | 55            | 0           | Primary              |
| 201304470        | invasive ductal carcinoma        | negative      | 0             | negative      | 0             | 0           | Primary              |

| Pathology_Number | Diagnosis                        | ER positivity | ER percentage | PR positivity | PR percentage | Her-2 score | Primary or Recurrent |
|------------------|----------------------------------|---------------|---------------|---------------|---------------|-------------|----------------------|
| 201304606        | mucinous carcinoma               | positive      | 95            | positive      | 60            | 0           | Primary              |
| 201304693        | invasive ductal carcinoma        | positive      | 95            | positive      | 95            | 1           | Primary              |
| 201304698        | invasive ductal carcinoma        | negative      | 0             | negative      | 0             | 0           | Primary              |
| 201304738        | encapsulated papillary carcinoma | positive      | 90            | positive      | 60            | None        | Primary              |
| 201304804        | invasive ductal carcinoma        | negative      | 0             | negative      | 0             | 0           | Primary              |
| 201304919        | invasive ductal carcinoma        | positive      | 75            | positive      | 120           | 0           | Primary              |
| 201305004        | invasive ductal carcinoma        | positive      | 45            | positive      | 1             | 0           | Recurrent            |
| 201305139        | invasive ductal carcinoma        | positive      | 98            | negative      | 0             | 2           | Primary              |
| 201305166        | invasive ductal carcinoma        | negative      | 0             | negative      | 0             | 2           | Primary              |
| 201305273        | encapsulated papillary carcinoma | positive      | 80            | positive      | 100           | 0           | Primary              |
| 201305274        | invasive mammary carcinoma       | positive      | 100           | positive      | 100           | 0           | Primary              |
| 201305462        | invasive mammary carcinoma       | negative      | 0             | negative      | 0             | 0           | Primary              |
| 201305638        | invasive ductal carcinoma        | positive      | 75            | positive      | 98            | 0           | Primary              |
| 201305710        | invasive ductal carcinoma        | negative      | 0             | negative      | 0             | 2           | Primary              |
| 201305925        | invasive ductal carcinoma        | positive      | 15            | positive      | 85            | 0           | Primary              |
| 201306180        | invasive ductal carcinoma        | negative      | 0             | negative      | 0             | 2           | Primary              |
| 201306259        | invasive ductal carcinoma        | positive      | 60            | positive      | 35            | 0           | Primary              |
| 201306315        | invasive ductal carcinoma        | positive      |               | positive      |               | 0           | Primary              |
| 201306354        | invasive ductal carcinoma        | negative      | 0             | negative      | 0             | 1           | Primary              |
| 201306355        | invasive ductal carcinoma        | negative      | 0             | positive      | 15            | 2           | Primary              |
| 201306356        | invasive ductal carcinoma        | negative      | 0             | negative      | 0             | 0           | Primary              |
| 201306362        | mucinous carcinoma               | positive      | 98            | positive      | 98            | 0           | Primary              |
| 201306552        | invasive ductal carcinoma        | positive      | 10            | negative      | 0             | 2           | Primary              |
| 201306559        | invasive ductal carcinoma        | positive      | 60            | positive      | 95            | 0           | Primary              |
| 201306593        | invasive ductal carcinoma        | negative      | 0             | negative      | 0             | 3           | Primary              |
| 201306821        | invasive ductal carcinoma        | positive      | 85            | positive      | 95            | 2           | Primary              |
| 201306880        | invasive ductal carcinoma        | positive      |               | positive      | 2             | 0           | Primary              |
| 201307073        | invasive ductal carcinoma        | negative      | 0             | None          | None          | None        | Primary              |
| 201307158        | invasive ductal carcinoma        | positive      | 30            | negative      | 0             | 0           | Primary              |
| 201307408        | invasive ductal carcinoma        | positive      | 55            | positive      | 98            | 0           | Primary              |
| 201307411        | invasive ductal carcinoma        | positive      | 95            | positive      | 20            | 0           | Primary              |
| 201307514        | invasive ductal carcinoma        | negative      | 0             | negative      | 0             | 0           | Primary              |
| 201307671        | invasive ductal carcinoma        | positive      | 20            | negative      | 0             | 3           | Primary              |
| 201307755        | invasive ductal carcinoma        | negative      | 0             | negative      | 0             | 1           | Primary              |
| 201307756        | invasive ductal carcinoma        | negative      | 0             | negative      | 0             | 1           | Primary              |
| 201307768        | invasive ductal carcinoma        | positive      |               | positive      |               | 0           | Primary              |
| 201307838        | invasive ductal carcinoma        | positive      | 90            | positive      | 3             | 0           | Primary              |

| Pathology_Number | Diagnosis                         | ER positivity | ER percentage | PR positivity | PR percentage | Her-2 score | Primary or Recurrent |
|------------------|-----------------------------------|---------------|---------------|---------------|---------------|-------------|----------------------|
| 201307969        | invasive ductal carcinoma         | negative      | 0             | negative      | 0             | 0           | Primary              |
| 201307970        | invasive ductal carcinoma         | positive      |               | positive      | 2             | 2           | Primary              |
| 201308099        | invasive ductal carcinoma         | negative      | 0             | negative      | 0             | 0           | Primary              |
| 201308277        | invasive ductal carcinoma         | negative      | 0             | negative      | 0             | 1           | Primary              |
| 201308279        | invasive ductal carcinoma         | positive      | 90            | positive      | 40            | 1           | Primary              |
| 201308284        | invasive ductal carcinoma         | positive      | 85            | positive      | 100           | 0           | Primary              |
| 201308352        | invasive ductal carcinoma         | positive      | 5             | positive      | 95            | 1           | Primary              |
| 201308466        | invasive ductal carcinoma         | positive      | 98            | positive      | 98            | 0           | Primary              |
| 201308473        | invasive ductal carcinoma         | positive      | 85            | positive      | 80            | 2           | Primary              |
| 201308482        | mucinous carcinoma                | positive      | 98            | positive      | 98            | 0           | Primary              |
| 201308590        | invasive ductal carcinoma         | positive      | 98            | positive      | 45            | 0           | Primary              |
| 201308686        | invasive ductal carcinoma         | negative      | 0             | negative      | 0             | 0           | Primary              |
| 201308687        | invasive ductal carcinoma         | negative      | 0             | negative      | 0             | 2           | Primary              |
| 201308699        | invasive ductal carcinoma         | negative      | 0             | negative      | 0             | 2           | Primary              |
| 201308851        | invasive ductal carcinoma         | positive      | 90            | positive      | 100           | 0           | Primary              |
| 201308854        | mucinous carcinoma                | positive      | 90            | positive      | 40            | 0           | Primary              |
| 201308861        | invasive lobular carcinoma        | positive      | 90            | positive      | 90            | 0           | Primary              |
| 201308891        | invasive ductal carcinoma         | positive      | 95            | positive      | 35            | 0           | Primary              |
| 201308892        | invasive ductal carcinoma         | positive      | 98            | positive      | 100           | 0           | Primary              |
| 201308919        | invasive ductal carcinoma         | negative      | 0             | negative      | 0             | 0           | Primary              |
| 201309089        | invasive ductal carcinoma         | positive      |               | negative      | 0             | 2           | Primary              |
| 201309372        | invasive ductal carcinoma         | positive      | 95            | positive      | 5             | 0           | Primary              |
| 201309381        | invasive ductal carcinoma         | positive      | 30            | positive      | 70            | 0           | Primary              |
| 201309448        | invasive ductal carcinoma         | positive      | 90            | positive      | 2             | 0           | Primary              |
| 201309624        | invasive ductal carcinoma         | positive      | 100           | positive      | 100           | 0           | Primary              |
| 201309653        | invasive ductal carcinoma         | positive      | 85            | positive      | 100           | 0           | Primary              |
| 201309654        | invasive ductal carcinoma         | positive      | 20            | positive      | 5             | 2           | Primary              |
| 201309776        | invasive ductal carcinoma         | negative      | 0             | negative      | 0             | 0           | Primary              |
| 201309848        | invasive ductal carcinoma         | None          | None          | None          | None          | None        | Primary              |
| 201310105        | invasive ductal carcinoma         | negative      | 0             | negative      | 0             | 2           | Primary              |
| 201310174        | invasive ductal carcinoma         | negative      | 0             | negative      | 0             | 2           | Primary              |
| 201310176        | invasive ductal carcinoma         | positive      | 80            | positive      | 70            | 0           | Primary              |
| 201310196        | invasive ductal carcinoma         | negative      | 0             | negative      | 0             | 0           | Primary              |
| 201310291        | invasive ductal carcinoma         | negative      | 0             | negative      | 0             | 2           | Recurrent            |
| 201310292        | invasive ductal carcinoma         | positive      | 90            | positive      | 70            | 0           | Primary              |
| 201310324        | invasive micropapillary carcinoma | positive      | 90            | positive      | 90            | 1           | Primary              |
| 201310325        | invasive ductal carcinoma         | negative      | 0             | negative      | 0             | 2           | Primary              |

| Pathology_Number | Diagnosis                 | ER positivity | ER percentage | PR positivity | PR percentage | Her-2 score | Primary or Recurrent |
|------------------|---------------------------|---------------|---------------|---------------|---------------|-------------|----------------------|
| 201310518        | invasive ductal carcinoma | positive      | 10            | positive      | 95            | 1           | Primary              |
| 201310667        | invasive ductal carcinoma | negative      | 0             | negative      | 0             | 1           | Primary              |
| 201310734        | invasive ductal carcinoma | positive      | 8             | positive      | 5             | 0           | Primary              |
| 201310735        | invasive ductal carcinoma | negative      | 0             | negative      | 0             | 0           | Primary              |
| 201310865        | invasive ductal carcinoma | positive      | 85            | positive      | 10            | 0           | Primary              |
| 201310868        | invasive ductal carcinoma | positive      | 70            | positive      | 20            | 1           | Primary              |
| 201310869        | invasive ductal carcinoma | positive      | 90            | positive      | 80            | 0           | Primary              |
| 201310878        | invasive ductal carcinoma | positive      | 70            | positive      | 20            | 0           | Primary              |
| 201311054        | invasive ductal carcinoma | positive      | 98            | positive      | 98            | 0           | Primary              |
| 201311230        | invasive ductal carcinoma | negative      | 0             | negative      | 0             | 2           | Primary              |
| 201311401        | invasive ductal carcinoma | negative      | 0             | negative      | 0             | 1           | Primary              |
| 201311404        | invasive ductal carcinoma | negative      | 0             | negative      | 0             | 0           | Primary              |
| 201311415        | mucinous carcinoma        | positive      | 30            | positive      | 30            | 0           | Primary              |
| 201311494        | invasive ductal carcinoma | negative      | 0             | negative      | 0             | 2           | Primary              |
| 201311656        | invasive ductal carcinoma | positive      |               | positive      |               | 0           | Primary              |
| 201311761        | invasive ductal carcinoma | positive      | 90            | positive      | 98            | 0           | Primary              |
| 201311762        | invasive ductal carcinoma | positive      | 65            | positive      | 30            | 0           | Primary              |
| 201311849        | invasive ductal carcinoma | positive      | 100           | positive      | 100           | 0           | Primary              |
| 201311987        | invasive ductal carcinoma | positive      | 95            | positive      | 95            | 0           | Primary              |
| 201312136        | invasive ductal carcinoma | positive      | 100           | positive      | 100           | 0           | Primary              |
| 201312185        | invasive ductal carcinoma | negative      | 0             | negative      | 0             | 0           | Primary              |
| 201312187        | invasive ductal carcinoma | positive      | 95            | positive      | 70            | 0           | Primary              |
| 201312229        | invasive ductal carcinoma | None          | None          | None          | None          | None        | Primary              |
| 201312263        | invasive ductal carcinoma | positive      |               | positive      | 90            | 1           | Primary              |
| 201312361        | invasive ductal carcinoma | positive      | 90            | positive      | 90            | 0           | Primary              |
| 201312375        | invasive ductal carcinoma | positive      | 99            | positive      | 90            | 0           | Primary              |
| 201312486        | invasive ductal carcinoma | None          | None          | None          | None          | None        | Primary              |
| 201312540        | invasive ductal carcinoma | negative      | 0             | negative      | 0             | 1           | Primary              |
| 201312546        | invasive ductal carcinoma | positive      | -1            | positive      | -1            | 2           | Primary              |
| 201312721        | invasive ductal carcinoma | positive      | 35            | positive      | 65            | 3           | Primary              |
| 201312874        | invasive ductal carcinoma | negative      | 0             | negative      | 0             | 2           | Primary              |
| 201312876        | invasive ductal carcinoma | positive      | 30            | positive      | 40            | 2           | Primary              |
| 201312883        | invasive ductal carcinoma | positive      | 98            | positive      | 65            | 2           | Primary              |
| 201313010        | invasive ductal carcinoma | positive      | 95            | positive      | 95            | 2           | Primary              |
| 201313011        | invasive ductal carcinoma | negative      | 0             | negative      | 0             | 1           | Primary              |
| 201313113        | invasive ductal carcinoma | positive      | 98            | positive      | 2             | 1           | Primary              |
| 201313115        | invasive ductal carcinoma | negative      | 0             | negative      | 0             | 3           | Primary              |
| 201313272        | invasive ductal carcinoma | positive      | 80            | positive      | 45            | 2           | Primary              |

| Pathology_Number | Diagnosis                  | ER positivity | ER percentage | PR positivity | PR percentage | Her-2 score | Primary or Recurrent |
|------------------|----------------------------|---------------|---------------|---------------|---------------|-------------|----------------------|
| 201313440        | invasive ductal carcinoma  | positive      | 70            | positive      | 70            | 3           | Primary              |
| 201313704        | invasive ductal carcinoma  | positive      | 60            | positive      | 60            | 1           | Primary              |
| 201313805        | invasive ductal carcinoma  | positive      | 80            | positive      | 90            | 0           | Primary              |
| 201313840        | invasive ductal carcinoma  | positive      | 35            | negative      | 0             | 1           | Primary              |
| 201313844        | invasive ductal carcinoma  | positive      | 80            | positive      | 10            | 2           | Primary              |
| 201313943        | invasive ductal carcinoma  | positive      | 90            | positive      | 100           | 0           | Primary              |
| 201313944        | invasive ductal carcinoma  | positive      | 100           | positive      | 100           | 0           | Primary              |
| 201314053        | metaplastic carcinoma      | positive      | 60            | negative      | 0             | 2           | Primary              |
| 201314110        | invasive ductal carcinoma  | positive      | 60            | positive      | 95            | 0           | Primary              |
| 201314187        | invasive ductal carcinoma  | positive      | 95            | positive      | 98            | 1           | Primary              |
| 201314209        | invasive ductal carcinoma  | negative      | 0             | negative      | 0             | 2           | Primary              |
| 201314222        | mucinous carcinoma         | positive      | 100           | positive      | 100           | 0           | Primary              |
| 201314425        | invasive ductal carcinoma  | negative      | 0             | negative      | 0             | 3           | Primary              |
| 201314492        | invasive ductal carcinoma  | negative      | 0             | negative      | 0             | 3           | Primary              |
| 201314607        | neuroendocrine carcinoma   | positive      | 70            | positive      | 45            | 0           | Primary              |
| 201314615        | invasive ductal carcinoma  | positive      | 85            | positive      | 85            | 2           | Primary              |
| 201314624        | invasive ductal carcinoma  | negative      | 0             | negative      | 0             | 3           | Primary              |
| 201314804        | invasive ductal carcinoma  | negative      | 0             | negative      | 0             | 3           | Primary              |
| 201314808        | invasive ductal carcinoma  | positive      | 95            | positive      | 98            | 1           | Primary              |
| 201314953        | invasive ductal carcinoma  | negative      | 0             | negative      | 0             | 2           | Primary              |
| 201315042        | invasive ductal carcinoma  | positive      | 90            | positive      | 5             | 2           | Primary              |
| 201315058        | invasive ductal carcinoma  | positive      | 98            | negative      | 0             | 2           | Primary              |
| 201315148        | invasive ductal carcinoma  | negative      | 0             | negative      | 0             | 2           | Primary              |
| 201315344        | invasive ductal carcinoma  | positive      | 100           | positive      | 90            | 0           | Primary              |
| 201315345        | invasive ductal carcinoma  | positive      | 98            | negative      | 0             | 0           | Primary              |
| 201315398        | invasive ductal carcinoma  | positive      | 99            | positive      | 97            | 1           | Primary              |
| 201315399        | invasive ductal carcinoma  | positive      |               | positive      | 15            | 3           | Primary              |
| 201315588        | invasive ductal carcinoma  | positive      | 85            | positive      | 90            | 2           | Primary              |
| 201315593        | invasive ductal carcinoma  | negative      | 0             | negative      | 0             | 0           | Primary              |
| 201315657        | invasive ductal carcinoma  | negative      | 0             | negative      | 0             | 1           | Primary              |
| 201315740        | invasive ductal carcinoma  | positive      | 90            | positive      | 80            | 1           | Primary              |
| 201315758        | mucinous carcinoma         | positive      |               | positive      |               | 1           | Primary              |
| 201315803        | invasive ductal carcinoma  | positive      | 98            | positive      | 98            | 1           | Primary              |
| 201315903        | invasive lobular carcinoma | positive      | 90            | positive      | 100           | 0           | Primary              |
| 201315905        | invasive ductal carcinoma  | positive      | 100           | positive      | 70            | 1           | Primary              |
| 201315906        | invasive ductal carcinoma  | positive      | 100           | negative      | 0             | 1           | Primary              |
| 201316173        | invasive ductal carcinoma  | positive      | 95            | positive      | 90            | 0           | Primary              |
| 201316180        | invasive ductal carcinoma  | positive      | 85            | positive      | 95            | 2           | Primary              |

| Pathology_Number | Diagnosis                  | ER positivity | ER percentage | PR positivity | PR percentage | Her-2 score | Primary or Recurrent |
|------------------|----------------------------|---------------|---------------|---------------|---------------|-------------|----------------------|
| 201316249        | invasive ductal carcinoma  | negative      | 0             | negative      | 0             | 3           | Primary              |
| 201316262        | mucinous carcinoma         | positive      | 100           | positive      | 100           | 0           | Primary              |
| 201316327        | invasive ductal carcinoma  | positive      | 4             | positive      | 2             | 3           | Primary              |
| 201316449        | invasive ductal carcinoma  | positive      | 70            | positive      | 90            | 1           | Primary              |
| 201316452        | invasive ductal carcinoma  | positive      | 40            | positive      | 15            | 1           | Primary              |
| 201316544        | ductal carcinoma NST       | negative      | 0             | negative      | 0             | 3           | Primary              |
| 201316610        | invasive ductal carcinoma  | negative      | 0             | negative      | 0             | 2           | Primary              |
| 201316712        | invasive ductal carcinoma  | negative      | 0             | negative      | 0             | 3           | Primary              |
| 201316715        | invasive ductal carcinoma  | negative      | 0             | negative      | 0             | 3           | Primary              |
| 201316743        | invasive ductal carcinoma  | positive      | 95            | positive      | 99            | 0           | Primary              |
| 201316800        | invasive ductal carcinoma  | positive      | 95            | positive      | 98            | 0           | Primary              |
| 201316902        | invasive ductal carcinoma  | positive      | 70            | positive      | 95            | 2           | Primary              |
| 201316945        | invasive ductal carcinoma  | positive      | 98            | positive      | 15            | 1           | Primary              |
| 201317068        | invasive ductal carcinoma  | negative      | 0             | negative      | 0             | 3           | Primary              |
| 201317072        | invasive ductal carcinoma  | positive      | 98            | positive      | 3             | 2           | Primary              |
| 201317098        | invasive ductal carcinoma  | positive      | 95            | positive      | 98            | 0           | Primary              |
| 201317128        | invasive ductal carcinoma  | negative      | 0             | negative      | 0             | 3           | Primary              |
| 201317323        | invasive ductal carcinoma  | positive      | 40            | positive      | 5             | 3           | Primary              |
| 201317430        | invasive ductal carcinoma  | positive      | 70            | positive      | 98            | 0           | Primary              |
| 201317432        | mucinous carcinoma         | positive      | 100           | positive      | 20            | 1           | Recurrent            |
| 201317651        | invasive ductal carcinoma  | positive      | 90            | positive      | 100           | 0           | Primary              |
| 201317653        | invasive mammary carcinoma | negative      | 0             | negative      | 0             | 0           | Primary              |
| 201317674        | invasive ductal carcinoma  | positive      |               | positive      | 90            | 2           | Primary              |
| 201317729        | invasive ductal carcinoma  | positive      |               | positive      | 10            | 2           | Primary              |
| 201317878        | invasive ductal carcinoma  | positive      |               | positive      |               | 1           | Primary              |
| 201317880        | invasive ductal carcinoma  | positive      | 98            | None          | None          | None        | Primary              |
| 201317895        | invasive ductal carcinoma  | negative      | 0             | negative      | 0             | 3           | Primary              |
| 201317994        | invasive ductal carcinoma  | positive      | 95            | positive      | 80            | 1           | Primary              |
| 201318202        | invasive ductal carcinoma  | positive      | 98            | positive      | 90            | 2           | Primary              |
| 201318210        | invasive ductal carcinoma  | positive      |               | positive      | 70            | 3           | Primary              |
| 201318211        | invasive ductal carcinoma  | positive      | 92            | positive      | 60            | 1           | Primary              |
| 201318339        | invasive ductal carcinoma  | positive      | 100           | positive      | 20            | 2           | Primary              |
| 201318347        | invasive lobular carcinoma | positive      | 90            | positive      | 160           | 1           | Primary              |
| 201318530        | invasive ductal carcinoma  | negative      | 0             | negative      | 0             | 3           | Primary              |
| 201318531        | invasive lobular carcinoma | positive      | 98            | positive      | 2             | 2           | Primary              |
| 201318532        | invasive ductal carcinoma  | positive      | 100           | positive      | 65            | 2           | Primary              |
| 201318592        | invasive mammary carcinoma | positive      | 8             | negative      | 0             | 1           | Primary              |
| 201318593        | invasive ductal carcinoma  | negative      | 0             | negative      | 0             | 3           | Primary              |

| Pathology_Number | Diagnosis                  | ER positivity | ER percentage | PR positivity | PR percentage | Her-2 score | Primary or Recurrent |
|------------------|----------------------------|---------------|---------------|---------------|---------------|-------------|----------------------|
| 201318631        | invasive ductal carcinoma  | positive      | 95            | positive      | 95            | 1           | Primary              |
| 201318680        | invasive ductal carcinoma  | positive      | 100           | positive      | 100           | 1           | Primary              |
| 201318701        | invasive ductal carcinoma  | negative      | 0             | negative      | 0             | 1           | Primary              |
| 201318702        | invasive ductal carcinoma  | negative      | 0             | negative      | 0             | 2           | Primary              |
| 201318713        | invasive lobular carcinoma | positive      | 85            | positive      | 55            | 1           | Primary              |
| 201318874        | invasive ductal carcinoma  | positive      | 100           | positive      | 95            | 2           | Primary              |
| 201318876        | invasive ductal carcinoma  | positive      | 90            | positive      | 60            | 2           | Primary              |
| 201318896        | invasive ductal carcinoma  | positive      | 76            | positive      | 40            | 0           | Primary              |
| 201318897        | metaplastic carcinoma      | negative      | 0             | negative      | 0             | 0           | Primary              |
| 201319038        | invasive ductal carcinoma  | positive      | 100           | negative      | 0             | 3           | Primary              |
| 201319047        | invasive ductal carcinoma  | positive      | -1            | positive      | -1            | 1           | Primary              |
| 201319048        | invasive ductal carcinoma  | positive      | 95            | positive      | 40            | 2           | Primary              |
| 201319209        | invasive ductal carcinoma  | negative      | 0             | negative      | 0             | 3           | Primary              |
| 201319211        | invasive ductal carcinoma  | positive      | 90            | positive      | 10            | 3           | Primary              |
| 201319431        | invasive ductal carcinoma  | positive      | 100           | positive      | 100           | 0           | Primary              |
| 201319432        | invasive ductal carcinoma  | positive      | 100           | positive      | 85            | 2           | Primary              |
| 201319442        | invasive ductal carcinoma  | positive      | 95            | positive      | 48            | 1           | Primary              |
| 201319493        | invasive ductal carcinoma  | positive      | 98            | positive      | 20            | 2           | Primary              |
| 201319626        | invasive ductal carcinoma  | positive      | 20            | positive      | 80            | 1           | Primary              |
| 201319710        | invasive ductal carcinoma  | positive      | 70            | positive      | 45            | 1           | Primary              |
| 201319774        | mucinous carcinoma         | positive      | 98            | positive      | 2             | 1           | Primary              |
| 201319870        | invasive ductal carcinoma  | negative      | 0             | negative      | 0             | 2           | Primary              |
| 201319871        | invasive ductal carcinoma  | negative      | 0             | negative      | 0             | 3           | Primary              |
| 201319962        | invasive ductal carcinoma  | positive      | 90            | negative      | 0             | 2           | Primary              |
| 201319967        | invasive ductal carcinoma  | positive      | 70            | positive      | 5             | 3           | Primary              |
| 201319970        | invasive ductal carcinoma  | positive      | 100           | positive      | 10            | 2           | Primary              |
| 201320169        | invasive ductal carcinoma  | negative      | 0             | negative      | 0             | 3           | Primary              |
| 201320172        | invasive ductal carcinoma  | negative      | 0             | negative      | 0             | 1           | Primary              |
| 201320344        | invasive lobular carcinoma | positive      | 95            | positive      | 10            | 1           | Primary              |
| 201320411        | invasive ductal carcinoma  | None          | None          | None          | None          | None        | Primary              |
| 201320418        | invasive lobular carcinoma | positive      | 90            | positive      | 160           | 1           | Primary              |
| 201320546        | invasive ductal carcinoma  | positive      | 98            | positive      | 55            | 1           | Primary              |
| 201320547        | invasive ductal carcinoma  | positive      | 100           | positive      | 100           | 0           | Primary              |
| 201320567        | invasive ductal carcinoma  | negative      | 0             | negative      | 0             | 3           | Primary              |
| 201320572        | invasive ductal carcinoma  | negative      | 0             | negative      | 0             | 3           | Primary              |
| 201320653        | invasive ductal carcinoma  | positive      | 95            | negative      | 0             | 2           | Primary              |
| 201320655        | invasive ductal carcinoma  | positive      | 70            | negative      | 0             | 3           | Primary              |
| 201320725        | invasive ductal carcinoma  | negative      | 0             | negative      | 0             | 3           | Primary              |



| Pathology_Number | Diagnosis                  | ER positivity | ER percentage | PR positivity | PR percentage | Her-2 score | Primary or Recurrent |
|------------------|----------------------------|---------------|---------------|---------------|---------------|-------------|----------------------|
| 201320726        | invasive ductal carcinoma  | positive      |               | positive      |               | 2           | Primary              |
| 201320831        | invasive ductal carcinoma  | positive      | 1             | negative      | 0             | 1           | Primary              |
| 201320836        | invasive ductal carcinoma  | positive      | 98            | positive      | 95            | 2           | Primary              |
| 201320885        | invasive ductal carcinoma  | positive      | 65            | positive      | 20            | 0           | Primary              |
| 201320887        | invasive ductal carcinoma  | positive      |               | negative      | 0             | 3           | Recurrent            |
| 201321074        | invasive ductal carcinoma  | positive      | 70            | positive      | 95            | 1           | Primary              |
| 201321075        | invasive ductal carcinoma  | negative      | 0             | negative      | 0             | 1           | Primary              |
| 201321077        | invasive ductal carcinoma  | positive      | 40            | positive      | 85            | 2           | Primary              |
| 201321136        | invasive ductal carcinoma  | negative      | 0             | negative      | 0             | 1           | Primary              |
| 201321137        | invasive ductal carcinoma  | positive      | 70            | positive      | 55            | 1           | Primary              |
| 201321206        | invasive ductal carcinoma  | positive      | 80            | positive      | 98            | 2           | Primary              |
| 201321403        | invasive ductal carcinoma  | negative      | 0             | negative      | 0             | 1           | Recurrent            |
| 201321436        | invasive ductal carcinoma  | positive      | 100           | positive      | 90            | 2           | Primary              |
| 201321437        | invasive ductal carcinoma  | negative      | 0             | negative      | 0             | 1           | Primary              |
| 201321444        | invasive ductal carcinoma  | positive      | 90            | positive      | 90            | 2           | Primary              |
| 201321481        | invasive ductal carcinoma  | negative      | 0             | negative      | 0             | 1           | Primary              |
| 201321718        | invasive ductal carcinoma  | negative      | 0             | negative      | 0             | 1           | Primary              |
| 201321733        | invasive ductal carcinoma  | positive      | 95            | positive      | 5             | 1           | Primary              |
| 201321757        | ductal carcinoma NST       | positive      | 95            | positive      | 90            | 0           | Primary              |
| 201321758        | ductal carcinoma NST       | positive      | 95            | positive      | 10            | 2           | Primary              |
| 201321773        | invasive ductal carcinoma  | positive      | 90            | positive      | 8             | 0           | Primary              |
| 201321924        | invasive ductal carcinoma  | positive      | 80            | positive      | 90            | 2           | Primary              |
| 201321994        | metaplastic carcinoma      | None          | None          | None          | None          | None        | Primary              |
| 201322030        | invasive ductal carcinoma  | positive      |               | positive      | 45            | 2           | Primary              |
| 201322148        | invasive ductal carcinoma  | negative      | 0             | positive      | 20            | 1           | Primary              |
| 201322289        | invasive ductal carcinoma  | positive      | 80            | positive      | 65            | 3           | Primary              |
| 201322334        | invasive ductal carcinoma  | negative      | 0             | negative      | 0             | 0           | Primary              |
| 201322335        | invasive ductal carcinoma  | positive      | 166           | positive      | 31            | 3           | Primary              |
| 201322336        | invasive ductal carcinoma  | positive      | 95            | positive      | 95            | 2           | Primary              |
| 201322337        | invasive ductal carcinoma  | positive      | 90            | positive      | 90            | 0           | Primary              |
| 201322515        | mucinous carcinoma         | positive      | 98            | positive      | 55            | 0           | Primary              |
| 201322518        | invasive ductal carcinoma  | negative      | 0             | negative      | 0             | 3           | Recurrent            |
| 201322519        | invasive ductal carcinoma  | positive      | 90            | positive      | 80            | 1           | Primary              |
| 201322645        | invasive lobular carcinoma | positive      | 98            | positive      | 98            | 1           | Primary              |
| 201322651        | invasive ductal carcinoma  | positive      | 15            | positive      | 100           | 1           | Primary              |
| 201322652        | mucinous carcinoma         | positive      | 70            | positive      | 30            | 0           | Primary              |
| 201322692        | invasive ductal carcinoma  | None          | None          | None          | None          | None        | Primary              |
| 201322693        | invasive ductal carcinoma  | positive      | 98            | positive      | 2             | 0           | Primary              |

| Pathology_Number | Diagnosis                  | ER positivity | ER percentage | PR positivity | PR percentage | Her-2 score | Primary or Recurrent |
|------------------|----------------------------|---------------|---------------|---------------|---------------|-------------|----------------------|
| 201322877        | invasive ductal carcinoma  | negative      | 0             | negative      | 0             | 1           | Primary              |
| 201323028        | invasive ductal carcinoma  | positive      | 30            | positive      | 45            | 1           | Primary              |
| 201323032        | invasive ductal carcinoma  | positive      | 65            | positive      | 65            | 2           | Primary              |
| 201323061        | invasive ductal carcinoma  | negative      | 0             | negative      | 0             | 3           | Primary              |
| 201323236        | invasive ductal carcinoma  | negative      | 0             | negative      | 0             | 3           | Primary              |
| 201323239        | invasive ductal carcinoma  | positive      | 98            | positive      | 98            | 2           | Primary              |
| 201323242        | invasive ductal carcinoma  | positive      | 30            | positive      | 55            | 2           | Primary              |
| 201323268        | ductal carcinoma NST       | positive      | 75            | positive      | 65            | 1           | Primary              |
| 201323414        | invasive ductal carcinoma  | positive      | 90            | positive      | 90            | 2           | Primary              |
| 201323425        | invasive ductal carcinoma  | negative      | 0             | negative      | 0             | 1           | Primary              |
| 201323475        | invasive ductal carcinoma  | positive      | 98            | positive      | 5             | 2           | Primary              |
| 201323494        | invasive ductal carcinoma  | negative      | 0             | negative      | 0             | 3           | Primary              |
| 201323496        | invasive ductal carcinoma  | negative      | 0             | negative      | 0             | 0           | Primary              |
| 201323574        | invasive ductal carcinoma  | positive      | 20            | negative      | 0             | 1           | Primary              |
| 201323582        | invasive ductal carcinoma  | positive      | 30            | positive      | 2             | 1           | Primary              |
| 201323635        | invasive ductal carcinoma  | positive      | 85            | positive      | 85            | 1           | Primary              |
| 201323636        | invasive ductal carcinoma  | positive      | 90            | positive      | 98            | 2           | Primary              |
| 201323858        | invasive ductal carcinoma  | positive      | 85            | positive      | 85            | 1           | Primary              |
| 201323981        | invasive ductal carcinoma  | positive      | 98            | positive      | 98            | 1           | Primary              |
| 201323982        | invasive ductal carcinoma  | negative      | 0             | negative      | 0             | 3           | Primary              |
| 201324051        | invasive ductal carcinoma  | positive      | 95            | positive      | 80            | 2           | Primary              |
| 201324141        | invasive mammary carcinoma | positive      | 100           | positive      | 3             | 0           | Primary              |
| 201324142        | invasive ductal carcinoma  | negative      | 0             | negative      | 0             | 0           | Primary              |
| 201324145        | invasive ductal carcinoma  | positive      | 60            | positive      | 70            | 0           | Primary              |
| 201324153        | invasive ductal carcinoma  | None          | None          | None          | None          | None        | Primary              |
| 201324308        | invasive ductal carcinoma  | positive      | 30            | positive      | 5             | 1           | Primary              |
| 201324374        | invasive ductal carcinoma  | positive      | 70            | positive      | 90            | 1           | Primary              |
| 201324392        | invasive ductal carcinoma  | positive      | 98            | positive      | 7             | 2           | Primary              |
| 201324393        | invasive ductal carcinoma  | positive      | 95            | negative      | 0             | 1           | Primary              |
| 201324394        | invasive mammary carcinoma | negative      | 0             | negative      | 0             | 0           | Primary              |
| 201324512        | invasive ductal carcinoma  | positive      | 45            | positive      | 20            | 0           | Primary              |
| 201324513        | invasive ductal carcinoma  | positive      | 95            | positive      | 100           | 2           | Primary              |
| 201324580        | invasive ductal carcinoma  | None          | None          | None          | None          | None        | Primary              |
| 201324582        | invasive ductal carcinoma  | positive      | 90            | positive      | 98            | 1           | Primary              |
| 201324585        | invasive ductal carcinoma  | negative      | 0             | negative      | 0             | 2           | Primary              |
| 201324600        | invasive ductal carcinoma  | negative      | 0             | negative      | 0             | 2           | Primary              |
| 201324601        | invasive ductal carcinoma  | positive      | 60            | positive      | 95            | 1           | Primary              |
| 201324756        | invasive ductal carcinoma  | positive      | 90            | positive      | 98            | 1           | Primary              |

| Pathology_Number | Diagnosis                        | ER positivity | ER percentage | PR positivity | PR percentage | Her-2 score | Primary or Recurrent |
|------------------|----------------------------------|---------------|---------------|---------------|---------------|-------------|----------------------|
| 201324833        | invasive ductal carcinoma        | positive      | 95            | positive      | 1             | 2           | Primary              |
| 201324917        | invasive ductal carcinoma        | positive      | 70            | positive      | 70            | 1           | Primary              |
| 201324918        | invasive ductal carcinoma        | positive      | 75            | positive      | 80            | 2           | Primary              |
| 201324925        | invasive ductal carcinoma        | negative      | 0             | negative      | 0             | 3           | Primary              |
| 201325000        | invasive ductal carcinoma        | positive      | 35            | positive      | 85            | 0           | Primary              |
| 201325001        | invasive ductal carcinoma        | positive      | 60            | positive      | 85            | 1           | Primary              |
| 201325145        | invasive ductal carcinoma        | positive      | 95            | positive      | 100           | 0           | Primary              |
| 201325148        | invasive ductal carcinoma        | negative      | 0             | negative      | 0             | 0           | Primary              |
| 201325158        | invasive ductal carcinoma        | negative      | 0             | negative      | 0             | 1           | Primary              |
| 201325292        | invasive ductal carcinoma        | negative      | 0             | negative      | 0             | 2           | Primary              |
| 201325305        | invasive ductal carcinoma        | positive      | 95            | positive      | 20            | 2           | Primary              |
| 201325384        | invasive ductal carcinoma        | negative      | 0             | negative      | 0             | 0           | Primary              |
| 201325385        | invasive ductal carcinoma        | positive      | 90            | positive      |               | 1           | Primary              |
| 201325387        | invasive ductal carcinoma        | positive      |               | positive      |               | None        | Primary              |
| 201325490        | invasive ductal carcinoma        | positive      | 45            | positive      | 65            | 1           | Primary              |
| 201325502        | invasive ductal carcinoma        | negative      | 0             | negative      | 0             | 0           | Primary              |
| 201325561        | invasive mammary carcinoma       | negative      | 0             | negative      | 0             | 0           | Primary              |
| 201325566        | invasive ductal carcinoma        | positive      | 5             | positive      | 90            | 0           | Primary              |
| 201325776        | encapsulated papillary carcinoma | positive      | 70            | positive      | 85            | None        | Primary              |
| 201325823        | invasive ductal carcinoma        | positive      | 40            | positive      | 40            | 2           | Primary              |
| 201325824        | invasive ductal carcinoma        | positive      | 95            | positive      | 20            | 1           | Primary              |
| 201325898        | invasive ductal carcinoma        | negative      | 0             | negative      | 0             | 3           | Primary              |
| 201325899        | invasive ductal carcinoma        | negative      | 0             | negative      | 0             | 2           | Primary              |
| 201325900        | invasive ductal carcinoma        | negative      | 0             | negative      | 0             | 2           | Primary              |
| 201325948        | invasive ductal carcinoma        | negative      | 0             | negative      | 0             | 3           | Primary              |
| 201326122        | invasive ductal carcinoma        | negative      | 0             | negative      | 0             | 3           | Primary              |
| 201326126        | invasive ductal carcinoma        | positive      | 90            | positive      | 30            | 2           | Primary              |
| 201326188        | invasive ductal carcinoma        | positive      | 55            | positive      | 99            | 2           | Primary              |
| 201326293        | invasive ductal carcinoma        | positive      | 90            | positive      | 30            | 0           | Primary              |
| 201326304        | invasive ductal carcinoma        | positive      | 98            | negative      | 0             | 0           | Primary              |
| 201326369        | invasive ductal carcinoma        | positive      | 80            | negative      | 0             | 1           | Primary              |
| 201326370        | invasive ductal carcinoma        | positive      | 90            | positive      | 15            | 2           | Primary              |
| 201326371        | invasive ductal carcinoma        | positive      | 55            | positive      | 1             | 2           | Primary              |
| 201326372        | invasive ductal carcinoma        | positive      | 80            | positive      | 3             | 1           | Primary              |
| 201326486        | ductal carcinoma NST             | negative      | 0             | negative      | 0             | 2           | Primary              |
| 201326503        | invasive ductal carcinoma        | negative      | 0             | negative      | 0             | 3           | Recurrent            |
| 201326504        | invasive ductal carcinoma        | positive      | 100           | positive      | 40            | 1           | Primary              |

| Pathology_Number | Diagnosis                  | ER positivity | ER percentage | PR positivity | PR percentage | Her-2 score | Primary or Recurrent |
|------------------|----------------------------|---------------|---------------|---------------|---------------|-------------|----------------------|
| 201326656        | invasive ductal carcinoma  | positive      | 90            | positive      | 95            | 1           | Primary              |
| 201326795        | invasive ductal carcinoma  | positive      | 80            | negative      | 0             | 1           | Primary              |
| 201326796        | neuroendocrine carcinoma   | negative      | 0             | negative      | 0             | 0           | Primary              |
| 201326844        | tubular carcinoma          | positive      | 90            | negative      | 0             | 0           | Primary              |
| 201326960        | invasive ductal carcinoma  | positive      | 90            | positive      | 98            | 0           | Primary              |
| 201326979        | invasive ductal carcinoma  | positive      | 93            | positive      | 98            | 0           | Primary              |
| 201327093        | invasive ductal carcinoma  | positive      | 90            | positive      | 98            | 2           | Primary              |
| 201327096        | invasive ductal carcinoma  | positive      | 98            | negative      | 0             | 2           | Primary              |
| 201327099        | invasive ductal carcinoma  | positive      | 90            | positive      | 20            | 2           | Primary              |
| 201327104        | invasive ductal carcinoma  | positive      | 90            | positive      | 85            | 0           | Primary              |
| 201327344        | invasive ductal carcinoma  | positive      | 95            | positive      | 95            | 1           | Primary              |
| 201327346        | invasive ductal carcinoma  | positive      | 90            | positive      | 70            | 1           | Primary              |
| 201327458        | invasive ductal carcinoma  | negative      | 0             | negative      | 0             | 3           | Primary              |
| 201327459        | invasive ductal carcinoma  | negative      | 0             | negative      | 0             | 3           | Primary              |
| 201327460        | invasive ductal carcinoma  | positive      | 80            | positive      | 98            | 1           | Primary              |
| 201327545        | invasive ductal carcinoma  | positive      | 10            | positive      | 5             | 0           | Primary              |
| 201327547        | invasive ductal carcinoma  | negative      | 0             | negative      | 0             | 3           | Primary              |
| 201327756        | mucinous carcinoma         | None          | None          | None          | None          | None        | Primary              |
| 201327757        | invasive ductal carcinoma  | positive      | 99            | positive      |               | 1           | Primary              |
| 201327791        | invasive ductal carcinoma  | positive      | 40            | positive      | 15            | 1           | Primary              |
| 201327903        | invasive ductal carcinoma  | positive      | 70            | positive      | 90            | 1           | Primary              |
| 201327904        | invasive ductal carcinoma  | positive      | 70            | positive      | 2             | 2           | Primary              |
| 201327913        | invasive ductal carcinoma  | positive      | 95            | negative      | 0             | 0           | Primary              |
| 201327986        | invasive ductal carcinoma  | positive      | 95            | positive      | 95            | 2           | Primary              |
| 201327988        | invasive ductal carcinoma  | positive      | 95            | positive      | 95            | 0           | Primary              |
| 201328075        | metaplastic carcinoma      | negative      | 0             | negative      | 0             | 0           | Primary              |
| 201328104        | invasive ductal carcinoma  | positive      | 90            | negative      | 0             | 0           | Primary              |
| 201328105        | invasive ductal carcinoma  | positive      | 95            | negative      | 0             | 1           | Primary              |
| 201328110        | invasive ductal carcinoma  | positive      | 98            | positive      | 98            | 0           | Primary              |
| 201328213        | invasive ductal carcinoma  | positive      | 65            | positive      | 98            | 1           | Primary              |
| 201328292        | invasive ductal carcinoma  | positive      | 70            | positive      | 70            | 3           | Primary              |
| 201328415        | invasive ductal carcinoma  | positive      | 70            | positive      | 10            | 2           | Primary              |
| 201328419        | invasive ductal carcinoma  | positive      | 40            | positive      | 5             | 0           | Primary              |
| 201328624        | invasive mammary carcinoma | positive      | 85            | positive      | 5             | 2           | Primary              |
| 201328625        | mucinous carcinoma         | positive      | 100           | positive      | 15            | 1           | Primary              |
| 201328628        | invasive ductal carcinoma  | positive      | 98            | positive      | 95            | 1           | Primary              |
| 201328673        | invasive ductal carcinoma  | negative      | 0             | negative      | 0             | 3           | Primary              |
| 201328769        | invasive ductal carcinoma  | positive      | 90            | positive      | 95            | 2           | Primary              |

| Pathology_Number | Diagnosis                  | ER positivity | ER percentage | PR positivity | PR percentage | Her-2 score | Primary or Recurrent |
|------------------|----------------------------|---------------|---------------|---------------|---------------|-------------|----------------------|
| 201328799        | invasive ductal carcinoma  | positive      | 60            | positive      | 90            | 1           | Primary              |
| 201328879        | invasive ductal carcinoma  | positive      | 95            | positive      | 95            | 2           | Primary              |
| 201328880        | invasive ductal carcinoma  | positive      | 95            | positive      | 70            | 1           | Primary              |
| 201328950        | invasive ductal carcinoma  | positive      | 90            | positive      | 90            | 2           | Primary              |
| 201328960        | invasive ductal carcinoma  | positive      |               | None          | None          | None        | Primary              |
| 201329074        | invasive ductal carcinoma  | negative      | 0             | negative      | 0             | 3           | Primary              |
| 201329126        | invasive ductal carcinoma  | positive      | 98            | positive      | 98            | 0           | Primary              |
| 201329301        | invasive ductal carcinoma  | negative      | 0             | negative      | 0             | 2           | Recurrent            |
| 201329303        | invasive ductal carcinoma  | negative      | 0             | negative      | 0             | 3           | Recurrent            |
| 201329325        | invasive ductal carcinoma  | positive      | 90            | positive      | 70            | 0           | Primary              |
| 201329330        | invasive ductal carcinoma  | positive      | 2             | negative      | 0             | 3           | Primary              |
| 201329568        | invasive ductal carcinoma  | positive      | 100           | positive      | 70            | 1           | Primary              |
| 201329569        | invasive ductal carcinoma  | positive      | 90            | positive      | 90            | 1           | Primary              |
| 201329570        | invasive ductal carcinoma  | positive      | 90            | positive      | 90            | 0           | Primary              |
| 201329659        | invasive ductal carcinoma  | positive      | 70            | negative      | 0             | 1           | Primary              |
| 201329669        | invasive ductal carcinoma  | negative      | 0             | negative      | 0             | 2           | Primary              |
| 201329670        | invasive ductal carcinoma  | positive      | 85            | positive      | 5             | 1           | Primary              |
| 201329679        | invasive ductal carcinoma  | positive      | 95            | positive      | 95            | 1           | Primary              |
| 201329767        | invasive lobular carcinoma | positive      |               | positive      |               | 0           | Primary              |
| 201329871        | invasive ductal carcinoma  | positive      | 90            | positive      | 30            | 1           | Primary              |
| 201329872        | invasive lobular carcinoma | positive      | 98            | positive      | 15            | 1           | Primary              |
| 201329893        | invasive lobular carcinoma | positive      | 90            | negative      | 0             | 1           | Primary              |
| 201329894        | invasive ductal carcinoma  | positive      | 85            | positive      | 55            | 0           | Primary              |
| 201330172        | invasive ductal carcinoma  | None          | None          | None          | None          | None        | Primary              |
| 201330180        | invasive ductal carcinoma  | positive      | 65            | positive      | 88            | 0           | Primary              |
| 201330451        | invasive ductal carcinoma  | positive      | 70            | positive      | 55            | 1           | Primary              |
| 201330534        | invasive ductal carcinoma  | positive      | 100           | positive      | 30            | 2           | Primary              |
| 201330548        | invasive ductal carcinoma  | positive      | 100           | positive      | 65            | 1           | Primary              |
| 201330636        | invasive ductal carcinoma  | positive      | 90            | negative      | 0             | 1           | Primary              |
| 201330732        | invasive ductal carcinoma  | positive      | 95            | positive      | 70            | 1           | Primary              |
| 201330763        | invasive ductal carcinoma  | positive      | 90            | positive      | 35            | 1           | Primary              |
| 201330764        | invasive ductal carcinoma  | positive      | 90            | positive      | 95            | 1           | Primary              |
| 201330767        | invasive ductal carcinoma  | positive      | 5             | negative      | 0             | 2           | Primary              |
| 201330883        | invasive ductal carcinoma  | positive      | 98            | positive      | 6             | 2           | Primary              |
| 201330884        | invasive ductal carcinoma  | positive      | 95            | positive      | 90            | 0           | Primary              |
| 201330951        | invasive ductal carcinoma  | negative      | 0             | negative      | 0             | 0           | Primary              |
| 201330953        | invasive ductal carcinoma  | positive      | 95            | positive      | 98            | 1           | Primary              |
| 201331061        | invasive ductal carcinoma  | positive      | 95            | positive      | 45            | 2           | Primary              |

| Pathology_Number | Diagnosis                        | ER positivity | ER percentage | PR positivity | PR percentage | Her-2 score | Primary or Recurrent |
|------------------|----------------------------------|---------------|---------------|---------------|---------------|-------------|----------------------|
| 201331099        | invasive ductal carcinoma        | positive      | 85            | positive      | 1             | 1           | Primary              |
| 201331251        | invasive ductal carcinoma        | positive      | 98            | positive      | 5             | 2           | Primary              |
| 201331303        | encapsulated papillary carcinoma | positive      | 95            | positive      | 15            | None        | Primary              |
| 201331308        | invasive ductal carcinoma        | positive      | 30            | positive      | 8             | 2           | Primary              |
| 201331373        | invasive ductal carcinoma        | positive      | 10            | positive      | 2             | 1           | Primary              |
| 201331476        | invasive ductal carcinoma        | positive      | 90            | negative      | 0             | 3           | Primary              |
| 201331496        | invasive ductal carcinoma        | positive      | 60            | positive      | 35            | 1           | Primary              |
| 201331560        | invasive ductal carcinoma        | negative      | 0             | negative      | 0             | 0           | Primary              |
| 201331561        | invasive ductal carcinoma        | positive      | 95            | negative      | 0             | 2           | Primary              |
| 201331726        | invasive ductal carcinoma        | positive      | 98            | positive      | 10            | 1           | Primary              |
| 201331735        | invasive ductal carcinoma        | positive      | 98            | positive      | 98            | 2           | Primary              |
| 201331736        | invasive ductal carcinoma        | positive      | 70            | positive      | 40            | 2           | Primary              |
| 201331847        | invasive ductal carcinoma        | positive      | 95            | positive      | 80            | 1           | Primary              |
| 201331862        | invasive ductal carcinoma        | positive      | 80            | positive      | 65            | 0           | Primary              |
| 201331919        | invasive ductal carcinoma        | positive      | 95            | positive      | 1             | 0           | Primary              |
| 201332047        | invasive ductal carcinoma        | positive      | 30            | negative      | 0             | 2           | Primary              |
| 201332048        | invasive ductal carcinoma        | positive      | 90            | positive      | -1            | 1           | Primary              |
| 201332284        | invasive ductal carcinoma        | negative      | 0             | negative      | 0             | 1           | Primary              |
| 201332296        | invasive ductal carcinoma        | positive      | 70            | positive      | 10            | 1           | Primary              |
| 201332429        | invasive mammary carcinoma       | positive      | 20            | negative      | 0             | 2           | Primary              |
| 201332661        | invasive ductal carcinoma        | positive      | 100           | positive      | 30            | 2           | Primary              |
| 201332682        | invasive mammary carcinoma       | positive      | 60            | positive      | 55            | 2           | Primary              |
| 201332827        | invasive ductal carcinoma        | positive      | 98            | positive      | 15            | 2           | Primary              |
| 201332828        | invasive ductal carcinoma        | positive      | 95            | positive      | 80            | 2           | Primary              |
| 201332830        | invasive ductal carcinoma        | positive      | 95            | positive      | 95            | 1           | Primary              |
| 201332831        | invasive ductal carcinoma        | negative      | 0             | negative      | 0             | 1           | Primary              |
| 201332858        | invasive ductal carcinoma        | positive      | 95            | positive      | 35            | 1           | Primary              |
| 201332859        | invasive ductal carcinoma        | positive      | 95            | positive      | 95            | None        | Primary              |
| 201332874        | invasive ductal carcinoma        | positive      | 95            | positive      | 90            | 0           | Primary              |
| 201333021        | invasive ductal carcinoma        | positive      | 100           | positive      | 100           | 1           | Primary              |
| 201333166        | encapsulated papillary carcinoma | positive      | 95            | positive      | 45            | None        | Primary              |
| 201333214        | invasive ductal carcinoma        | positive      | 100           | positive      | 100           | 0           | Recurrent            |
| 201333216        | invasive ductal carcinoma        | positive      | 100           | positive      | 2             | 2           | Primary              |
| 201333346        | invasive ductal carcinoma        | positive      | 90            | positive      | 40            | 1           | Primary              |
| 201333347        | invasive ductal carcinoma        | positive      | 100           | positive      | 70            | 2           | Primary              |
| 201333348        | invasive ductal carcinoma        | positive      | 98            | positive      | 1             | 1           | Primary              |
| 201333363        | invasive ductal carcinoma        | negative      | 0             | negative      | 0             | 1           | Primary              |

| Pathology_Number | Diagnosis                        | ER positivity | ER percentage | PR positivity | PR percentage | Her-2 score | Primary or Recurrent |
|------------------|----------------------------------|---------------|---------------|---------------|---------------|-------------|----------------------|
| 201333508        | invasive ductal carcinoma        | positive      | 3             | negative      | 0             | 3           | Primary              |
| 201333516        | invasive ductal carcinoma        | positive      | 100           | negative      | 0             | 1           | Primary              |
| 201333524        | invasive ductal carcinoma        | negative      | 0             | negative      | 0             | 2           | Primary              |
| 201333525        | invasive ductal carcinoma        | positive      | 100           | positive      | 95            | 0           | Primary              |
| 201333582        | mucinous carcinoma               | positive      | 100           | positive      | 80            | 0           | Primary              |
| 201333702        | invasive ductal carcinoma        | positive      | 95            | positive      | 70            | 2           | Primary              |
| 201333704        | invasive ductal carcinoma        | positive      | 90            | negative      | 0             | 1           | Primary              |
| 201333975        | invasive ductal carcinoma        | positive      | 25            | positive      | 40            | 2           | Primary              |
| 201334107        | invasive ductal carcinoma        | positive      | 95            | positive      | 80            | 2           | Primary              |
| 201334108        | invasive ductal carcinoma        | negative      | 0             | negative      | 0             | 2           | Primary              |
| 201334281        | invasive ductal carcinoma        | positive      |               | None          | None          | None        | Primary              |
| 201334320        | invasive ductal carcinoma        | positive      |               | None          | None          | None        | Recurrent            |
| 201334441        | invasive ductal carcinoma        | positive      | 20            | positive      |               | 0           | Primary              |
| 201334486        | invasive ductal carcinoma        | positive      | 5             | positive      | 3             | 1           | Primary              |
| 201334487        | invasive ductal carcinoma        | positive      | 70            | positive      | 5             | 0           | Primary              |
| 201334626        | invasive ductal carcinoma        | positive      | 95            | positive      | 65            | 1           | Primary              |
| 201334779        | invasive ductal carcinoma        | positive      | 95            | positive      | 90            | 1           | Primary              |
| 201334947        | invasive ductal carcinoma        | positive      | 95            | positive      | 95            | 2           | Primary              |
| 201335066        | invasive ductal carcinoma        | positive      | 80            | positive      | 85            | 1           | Primary              |
| 201335068        | invasive ductal carcinoma        | positive      | 85            | positive      | 1             | 1           | Primary              |
| 201335069        | invasive ductal carcinoma        | negative      | 0             | negative      | 0             | 2           | Primary              |
| 201335083        | invasive ductal carcinoma        | negative      | 0             | negative      | 0             | 1           | Primary              |
| 201335146        | invasive ductal carcinoma        | positive      | 10            | positive      | 15            | 1           | Primary              |
| 201335148        | mucinous carcinoma               | None          | None          | None          | None          | None        | Primary              |
| 201335259        | encapsulated papillary carcinoma | positive      | 100           | positive      | 95            | None        | Primary              |
| 201335274        | invasive ductal carcinoma        | None          | None          | None          | None          | None        | Primary              |
| 201335319        | invasive ductal carcinoma        | None          | None          | None          | None          | None        | Primary              |
| 201335649        | invasive ductal carcinoma        | None          | None          | None          | None          | None        | Primary              |
| 201335668        | invasive ductal carcinoma        | negative      | 0             | negative      | 0             | 1           | Primary              |
| 201335669        | invasive ductal carcinoma        | positive      | 98            | positive      | 85            | 2           | Primary              |
| 201335752        | invasive ductal carcinoma        | positive      | 95            | positive      | 95            | 1           | Primary              |
| 201335941        | invasive ductal carcinoma        | positive      | 98            | positive      | 30            | 2           | Primary              |
| 201336051        | mucinous carcinoma               | None          | None          | None          | None          | None        | Primary              |
| 201336053        | mucinous carcinoma               | None          | None          | None          | None          | None        | Primary              |
| 201336161        | invasive ductal carcinoma        | negative      | 0             | negative      | 0             | 1           | Primary              |
| 201336162        | invasive ductal carcinoma        | positive      | 98            | positive      | 95            | 2           | Primary              |
| 201336325        | invasive ductal carcinoma        | positive      | 90            | positive      | 90            | 1           | Primary              |

| Pathology_Number | Diagnosis                  | ER positivity | ER percentage | PR positivity | PR percentage | Her-2 score | Primary or Recurrent |
|------------------|----------------------------|---------------|---------------|---------------|---------------|-------------|----------------------|
| 201336326        | invasive ductal carcinoma  | positive      | 70            | positive      | 20            | 2           | Primary              |
| 201336328        | invasive ductal carcinoma  | positive      | 98            | positive      | 70            | 1           | Primary              |
| 201336512        | invasive ductal carcinoma  | negative      | 0             | negative      | 0             | 0           | Primary              |
| 201336513        | invasive ductal carcinoma  | positive      | 5             | negative      | 0             | 2           | Primary              |
| 201336517        | invasive ductal carcinoma  | positive      | 95            | positive      | 85            | 1           | Primary              |
| 201336528        | invasive lobular carcinoma | None          | None          | None          | None          | None        | Primary              |
| 201336529        | invasive lobular carcinoma | positive      | 60            | positive      | 80            | 0           | Primary              |
| 201336655        | invasive ductal carcinoma  | negative      | 0             | negative      | 0             | 3           | Primary              |
| 201336656        | invasive ductal carcinoma  | positive      | 70            | positive      | 35            | 1           | Primary              |
| 201336657        | invasive ductal carcinoma  | positive      | 90            | positive      | 70            | 0           | Primary              |
| 201336763        | invasive ductal carcinoma  | positive      | 95            | positive      | 55            | 1           | Primary              |
| 201336788        | invasive ductal carcinoma  | negative      | 0             | negative      | 0             | 0           | Primary              |
| 201336789        | invasive ductal carcinoma  | positive      | 95            | positive      | 65            | 1           | Primary              |
| 201336940        | invasive ductal carcinoma  | positive      | 80            | positive      | 10            | 0           | Primary              |
| 201337007        | invasive ductal carcinoma  | positive      | 98            | positive      | 85            | 0           | Primary              |
| 201337008        | invasive ductal carcinoma  | negative      | 0             | negative      | 0             | 1           | Primary              |
| 201337108        | invasive ductal carcinoma  | positive      | 10            | positive      | 90            | 1           | Primary              |
| 201337109        | invasive ductal carcinoma  | positive      | 15            | positive      | 60            | 1           | Primary              |
| 201337113        | neuroendocrine carcinoma   | negative      | 0             | negative      | 0             | 0           | Primary              |
| 201337134        | invasive ductal carcinoma  | positive      | 98            | negative      | 0             | 0           | Primary              |
| 201337190        | invasive ductal carcinoma  | negative      | 0             | negative      | 0             | 0           | Primary              |
| 201337284        | invasive ductal carcinoma  | positive      | 70            | positive      | 40            | 0           | Primary              |
| 201337285        | invasive ductal carcinoma  | positive      | 45            | positive      | 40            | 0           | Primary              |
| 201337317        | invasive ductal carcinoma  | positive      | 80            | negative      | 0             | 0           | Primary              |
| 201337318        | invasive ductal carcinoma  | positive      |               | negative      | 0             | 1           | Primary              |
| 201337361        | mucinous carcinoma         | positive      | 85            | positive      | 95            | 0           | Primary              |
| 201337362        | invasive ductal carcinoma  | positive      |               | positive      |               | None        | Primary              |
| 201337509        | invasive ductal carcinoma  | positive      | 70            | negative      | 0             | 0           | Primary              |
| 201337513        | invasive ductal carcinoma  | positive      | 20            | positive      | 60            | 0           | Primary              |
| 201337581        | invasive ductal carcinoma  | positive      | 60            | positive      | 2             | 0           | Primary              |
| 201337699        | invasive ductal carcinoma  | negative      | 0             | negative      | 0             | 0           | Primary              |
| 201337715        | invasive ductal carcinoma  | negative      | 0             | negative      | 0             | 0           | Primary              |
| 201337749        | invasive ductal carcinoma  | positive      | 100           | positive      |               | 0           | Primary              |
| 201337856        | invasive ductal carcinoma  | positive      | 90            | negative      | 0             | 0           | Primary              |
| 201337863        | invasive ductal carcinoma  | positive      | 98            | positive      | 20            | 0           | Primary              |
| 201337906        | invasive lobular carcinoma | positive      | 95            | negative      | 0             | 0           | Primary              |
| 201338034        | invasive ductal carcinoma  | positive      | 90            | positive      | 90            | 1           | Primary              |
| 201338162        | invasive ductal carcinoma  | positive      | 100           | positive      | 35            | 1           | Primary              |



| Pathology_Number | Diagnosis                  | ER positivity | ER percentage | PR positivity | PR percentage | Her-2 score | Primary or Recurrent |
|------------------|----------------------------|---------------|---------------|---------------|---------------|-------------|----------------------|
| 201338165        | invasive ductal carcinoma  | positive      | 100           | positive      | 98            | 0           | Primary              |
| 201338177        | invasive ductal carcinoma  | positive      | 95            | positive      | 55            | 0           | Primary              |
| 201338209        | invasive ductal carcinoma  | positive      | 95            | positive      |               | 0           | Primary              |
| 201338272        | invasive ductal carcinoma  | negative      | 0             | negative      | 0             | 2           | Primary              |
| 201338398        | invasive ductal carcinoma  | positive      | 95            | positive      | 95            | 1           | Primary              |
| 201338399        | invasive ductal carcinoma  | positive      | 95            | positive      | 95            | 1           | Primary              |
| 201338447        | invasive ductal carcinoma  | positive      | 80            | positive      | 65            | 0           | Primary              |
| 201338488        | mucinous carcinoma         | positive      | 100           | positive      | 20            | 0           | Primary              |
| 201338508        | invasive mammary carcinoma | positive      | 70            | positive      | 20            | 0           | Primary              |
| 201338620        | invasive ductal carcinoma  | positive      | 95            | positive      | 95            | 0           | Primary              |
| 201338623        | solid papillary carcinoma  | positive      | 95            | positive      | 95            | 0           | Primary              |
| 201338632        | invasive ductal carcinoma  | positive      | 24            | positive      | 55            | 0           | Primary              |
| 201338795        | invasive ductal carcinoma  | positive      | 100           | positive      | 100           | 0           | Primary              |
| 201338863        | invasive ductal carcinoma  | positive      | 95            | positive      | 95            | 0           | Primary              |
| 201338932        | invasive ductal carcinoma  | None          | None          | None          | None          | None        | Primary              |
| 201339040        | invasive lobular carcinoma | positive      | 95            | positive      | 98            | 0           | Primary              |
| 201339041        | invasive ductal carcinoma  | positive      | 98            | positive      | 90            | 0           | Primary              |
| 201339042        | invasive ductal carcinoma  | positive      | 98            | positive      | 98            | 1           | Primary              |
| 201339173        | invasive ductal carcinoma  | negative      | 0             | negative      | 0             | 3           | Primary              |
| 201339357        | invasive mammary carcinoma | positive      | 100           | positive      | 95            | 1           | Primary              |
| 201339359        | invasive ductal carcinoma  | positive      | 100           | negative      | 0             | 0           | Primary              |
| 201339387        | invasive ductal carcinoma  | positive      | 99            | positive      | 99            | 0           | Primary              |
| 201339395        | invasive ductal carcinoma  | negative      | 0             | negative      | 0             | None        | Primary              |
| 201339397        | invasive ductal carcinoma  | positive      | 90            | positive      | 90            | 0           | Primary              |
| 201339559        | solid papillary carcinoma  | positive      | 100           | positive      | 98            | None        | Primary              |
| 201339566        | invasive lobular carcinoma | positive      | 100           | positive      | 95            | 1           | Primary              |
| 201339568        | invasive ductal carcinoma  | negative      | 0             | negative      | 0             | 3           | Primary              |
| 201339809        | invasive mammary carcinoma | positive      | 98            | negative      | 0             | 1           | Primary              |
| 201339989        | invasive ductal carcinoma  | negative      | 0             | negative      | 0             | 2           | Primary              |
| 201339990        | invasive ductal carcinoma  | positive      | 95            | negative      | 0             | 2           | Primary              |
| 201340087        | invasive ductal carcinoma  | None          | None          | None          | None          | None        | Primary              |
| 201340245        | invasive ductal carcinoma  | positive      |               | positive      | 70            | 2           | Primary              |
| 201340247        | invasive ductal carcinoma  | positive      |               | positive      | 99            | 0           | Primary              |
| 201340339        | invasive ductal carcinoma  | positive      | 98            | positive      | 10            | 2           | Primary              |
| 201340478        | mucinous carcinoma         | positive      | 70            | negative      | 0             | 1           | Primary              |
| 201340480        | invasive mammary carcinoma | positive      | 98            | positive      | 35            | 2           | Primary              |
| 201340502        | mucinous carcinoma         | positive      |               | positive      | 85            | 2           | Primary              |
| 201340503        | invasive ductal carcinoma  | positive      | 90            | positive      | 45            | 1           | Primary              |

| Pathology_Number | Diagnosis                  | ER positivity | ER percentage | PR positivity | PR percentage | Her-2 score | Primary or Recurrent |
|------------------|----------------------------|---------------|---------------|---------------|---------------|-------------|----------------------|
| 201340632        | invasive ductal carcinoma  | negative      | 0             | negative      | 0             | 3           | Primary              |
| 201340634        | solid papillary carcinoma  | positive      | 99            | positive      | 99            | 0           | Primary              |
| 201340807        | invasive ductal carcinoma  | positive      | 95            | positive      | 3             | 2           | Primary              |
| 201340847        | invasive ductal carcinoma  | positive      | 95            | positive      | 55            | 2           | Primary              |
| 201340848        | invasive ductal carcinoma  | positive      | 90            | positive      | 98            | 1           | Primary              |
| 201340870        | invasive ductal carcinoma  | positive      | 95            | positive      | 95            | 1           | Primary              |
| 201341161        | invasive ductal carcinoma  | positive      | 100           | positive      | 90            | 1           | Primary              |
| 201341222        | invasive ductal carcinoma  | negative      | 0             | negative      | 0             | 0           | Primary              |
| 201341356        | invasive ductal carcinoma  | positive      | 95            | positive      | 2             | 1           | Primary              |
| 201341360        | mucinous carcinoma         | positive      | 95            | negative      | 0             | 2           | Primary              |
| 201341367        | invasive ductal carcinoma  | positive      |               | positive      |               | 1           | Primary              |
| 201341423        | solid papillary carcinoma  | None          | None          | None          | None          | None        | Primary              |
| 201341512        | invasive ductal carcinoma  | negative      | 0             | negative      | 0             | 1           | Primary              |
| 201341514        | invasive ductal carcinoma  | positive      | 85            | negative      | 0             | 3           | Primary              |
| 201341516        | invasive ductal carcinoma  | positive      | 98            | positive      | 90            | 1           | Primary              |
| 201341525        | invasive lobular carcinoma | positive      | 95            | positive      | 90            | 1           | Primary              |
| 201341704        | invasive ductal carcinoma  | positive      | 98            | positive      | 90            | 1           | Primary              |
| 201341845        | mucinous carcinoma         | positive      |               | positive      |               | None        | Primary              |
| 201341857        | invasive ductal carcinoma  | negative      | 0             | negative      | 0             | 0           | Primary              |
| 201342408        | invasive ductal carcinoma  | negative      | 0             | negative      | 0             | 0           | Primary              |
| 201342411        | invasive ductal carcinoma  | negative      | 0             | negative      | 0             | 1           | Primary              |
| 201342412        | invasive ductal carcinoma  | positive      | 100           | negative      | 0             | 0           | Primary              |
| 201342478        | invasive ductal carcinoma  | positive      | 98            | positive      | 3             | 1           | Primary              |
| 201342568        | invasive ductal carcinoma  | positive      | 95            | positive      | 98            | 1           | Primary              |
| 201342884        | invasive ductal carcinoma  | positive      | 95            | positive      |               | 1           | Primary              |
| 201343007        | invasive ductal carcinoma  | positive      | 70            | positive      | 70            | 3           | Primary              |
| 201343009        | invasive ductal carcinoma  | negative      | 0             | negative      | 0             | 0           | Primary              |
| 201343120        | invasive mammary carcinoma | positive      | 100           | positive      | 98            | 1           | Primary              |
| 201343185        | invasive ductal carcinoma  | negative      | 0             | negative      | 0             | 1           | Primary              |
| 201343282        | invasive ductal carcinoma  | positive      | 90            | negative      | 0             | 2           | Primary              |
| 201343292        | invasive ductal carcinoma  | positive      | 90            | positive      | 40            | 1           | Primary              |
| 201343306        | mucinous carcinoma         | positive      | 95            | negative      | 0             | 1           | Primary              |
| 201343362        | invasive ductal carcinoma  | positive      | 95            | positive      | 20            | 1           | Primary              |
| 201343363        | invasive ductal carcinoma  | positive      | 95            | positive      | 20            | 0           | Primary              |
| 201343503        | mucinous carcinoma         | positive      | 99            | positive      | 55            | 0           | Primary              |
| 201343509        | invasive ductal carcinoma  | positive      | 55            | negative      | 0             | 2           | Primary              |
| 201343657        | invasive ductal carcinoma  | negative      | 0             | negative      | 0             | 3           | Primary              |
| 201343659        | invasive ductal carcinoma  | positive      | 90            | positive      | 5             | 1           | Primary              |

| Pathology_Number | Diagnosis                 | ER positivity | ER percentage | PR positivity | PR percentage | Her-2 score | Primary or Recurrent |
|------------------|---------------------------|---------------|---------------|---------------|---------------|-------------|----------------------|
| 201343662        | invasive ductal carcinoma | positive      | 90            | positive      | 95            | 1           | Primary              |
| 201343683        | invasive ductal carcinoma | positive      | 98            | positive      | 80            | 0           | Primary              |
| 201343717        | invasive ductal carcinoma | positive      | 90            | positive      | 98            | 1           | Primary              |
| 201343828        | invasive ductal carcinoma | positive      | 95            | negative      | 0             | 2           | Primary              |
| 201343841        | mucinous carcinoma        | positive      | 98            | positive      | 70            | 0           | Primary              |
| 201343842        | invasive ductal carcinoma | negative      | 0             | negative      | 0             | 3           | Primary              |
| 201343843        | invasive ductal carcinoma | negative      | 0             | negative      | 0             | 3           | Primary              |
| 201344076        | invasive ductal carcinoma | positive      | 95            | positive      | 10            | 2           | Primary              |
| 201344218        | invasive ductal carcinoma | None          | None          | None          | None          | None        | Primary              |
| 201344284        | invasive ductal carcinoma | negative      | 0             | negative      | 0             | 3           | Primary              |
| 201344292        | invasive ductal carcinoma | None          | None          | None          | None          | None        | Primary              |
| 201344411        | invasive ductal carcinoma | positive      | 98            | positive      | 95            | 0           | Primary              |
| 201344463        | invasive ductal carcinoma | positive      |               | negative      | 0             | 1           | Primary              |
| 201344565        | invasive ductal carcinoma | positive      | 98            | positive      | 99            | 2           | Primary              |
| 201344566        | invasive ductal carcinoma | positive      | 98            | positive      | 90            | 2           | Primary              |
| 201344569        | invasive ductal carcinoma | positive      | 98            | positive      | 95            | 2           | Primary              |
| 201344578        | invasive ductal carcinoma | positive      | 100           | positive      | 60            | 2           | Primary              |
| 201344579        | invasive ductal carcinoma | positive      | 179           | positive      | 194           | 1           | Primary              |
| 201344644        | invasive ductal carcinoma | positive      | 80            | positive      | 85            | 2           | Primary              |
| 201344645        | invasive ductal carcinoma | positive      | 95            | positive      | 30            | 1           | Primary              |
| 201344646        | invasive ductal carcinoma | positive      | 90            | positive      | 95            | 1           | Primary              |
| 201344648        | invasive ductal carcinoma | positive      | 85            | positive      | 70            | 2           | Primary              |
| 201344649        | invasive ductal carcinoma | positive      | 98            | positive      | 90            | 1           | Primary              |
| 201344842        | invasive ductal carcinoma | positive      | 60            | positive      | 15            | 2           | Recurrent            |
| 201344902        | invasive ductal carcinoma | positive      | 100           | positive      | 2             | 1           | Primary              |
| 201344905        | invasive ductal carcinoma | negative      | 0             | negative      | 0             | 3           | Primary              |
| 201344996        | invasive ductal carcinoma | negative      | 0             | negative      | 0             | 3           | Primary              |
| 201345007        | invasive ductal carcinoma | positive      | 98            | positive      | 98            | 2           | Primary              |
| 201345047        | invasive ductal carcinoma | negative      | 0             | negative      | 0             | 3           | Primary              |
| 201345150        | invasive ductal carcinoma | negative      | 0             | negative      | 0             | 0           | Primary              |
| 201345326        | invasive ductal carcinoma | negative      | 0             | negative      | 0             | 1           | Primary              |
| 201345330        | invasive ductal carcinoma | negative      | 0             | negative      | 0             | 1           | Primary              |
| 201345335        | invasive ductal carcinoma | positive      | 95            | positive      | 2             | 2           | Primary              |
| 201345498        | invasive ductal carcinoma | positive      | 95            | positive      | 10            | 1           | Primary              |
| 201345501        | invasive ductal carcinoma | positive      | 95            | positive      | 30            | 2           | Primary              |
| 201345502        | invasive ductal carcinoma | positive      | 98            | negative      | 0             | 2           | Primary              |
| 201400071        | invasive ductal carcinoma | positive      | 99            | positive      | 65            | 2           | Primary              |
| 201400229        | invasive ductal carcinoma | negative      | 0             | negative      | 0             | 0           | Primary              |

| Pathology_Number | Diagnosis                 | ER positivity | ER percentage | PR positivity | PR percentage | Her-2 score | Primary or Recurrent |
|------------------|---------------------------|---------------|---------------|---------------|---------------|-------------|----------------------|
| 201400230        | invasive ductal carcinoma | negative      | 0             | negative      | 0             | 2           | Primary              |
| 201400350        | invasive ductal carcinoma | positive      | 45            | positive      | 50            | 1           | Primary              |
| 201400390        | invasive ductal carcinoma | negative      | 0             | negative      | 0             | 3           | Primary              |
| 201400592        | invasive ductal carcinoma | positive      | 100           | negative      | 0             | 2           | Primary              |
| 201400609        | invasive ductal carcinoma | positive      | 98            | positive      | 70            | 2           | Primary              |
| 201400662        | invasive ductal carcinoma | positive      | 98            | positive      | 90            | 1           | Primary              |
| 201400756        | invasive ductal carcinoma | negative      | 0             | negative      | 0             | 3           | Primary              |
| 201400774        | invasive ductal carcinoma | positive      | 90            | positive      | 90            | 2           | Primary              |
| 201400847        | invasive ductal carcinoma | positive      | 95            | negative      | 0             | 0           | Primary              |
| 201400962        | invasive ductal carcinoma | positive      | 85            | positive      | 3             | 2           | Primary              |
| 201401122        | invasive ductal carcinoma | positive      | 98            | positive      | 100           | 1           | Primary              |
| 201401294        | invasive ductal carcinoma | None          | None          | None          | None          | None        | Primary              |
| 201401295        | invasive ductal carcinoma | None          | None          | None          | None          | None        | Primary              |
| 201401296        | invasive ductal carcinoma | None          | None          | None          | None          | None        | Primary              |
| 201401315        | invasive ductal carcinoma | positive      | 70            | negative      | 0             | 1           | Primary              |
| 201401316        | invasive ductal carcinoma | positive      | 95            | positive      | 40            | 2           | Primary              |
| 201401483        | invasive ductal carcinoma | positive      | 90            | positive      | 98            | 0           | Primary              |
| 201401490        | invasive ductal carcinoma | positive      | 9             | negative      | 0             | 0           | Primary              |
| 201401563        | invasive ductal carcinoma | positive      | 90            | positive      | 95            | 0           | Primary              |
| 201401650        | mucinous carcinoma        | positive      | 98            | positive      | 98            | 0           | Primary              |
| 201401654        | invasive ductal carcinoma | positive      | 98            | positive      | 5             | 2           | Primary              |
| 201401742        | invasive ductal carcinoma | negative      | 0             | negative      | 0             | 3           | Primary              |
| 201401745        | invasive ductal carcinoma | positive      | 98            | positive      | -1            | 1           | Primary              |
| 201401817        | invasive ductal carcinoma | negative      | 0             | negative      | 0             | 2           | Primary              |
| 201401819        | invasive ductal carcinoma | positive      | 40            | positive      | 5             | 1           | Primary              |
| 201401820        | invasive ductal carcinoma | positive      | 80            | positive      | 80            | 2           | Primary              |
| 201401821        | invasive ductal carcinoma | positive      | 90            | positive      | 98            | 1           | Primary              |
| 201401828        | invasive ductal carcinoma | positive      | 99            | positive      | 80            | 0           | Primary              |
| 201401965        | invasive ductal carcinoma | positive      | 95            | positive      | 99            | 1           | Primary              |
| 201401966        | invasive ductal carcinoma | negative      | 0             | negative      | 0             | 3           | Primary              |
| 201401994        | invasive ductal carcinoma | positive      | 85            | positive      | 90            | 3           | Primary              |
| 201402050        | invasive ductal carcinoma | negative      | 0             | negative      | 0             | 0           | Primary              |
| 201402143        | invasive ductal carcinoma | positive      | 40            | negative      | 0             | 1           | Primary              |
| 201402144        | mucinous carcinoma        | positive      | 90            | positive      | 100           | 0           | Primary              |
| 201402194        | invasive ductal carcinoma | negative      | 0             | negative      | 0             | 3           | Primary              |
| 201402390        | invasive ductal carcinoma | positive      | 20            | negative      | 0             | 2           | Primary              |
| 201402441        | invasive ductal carcinoma | negative      | 0             | negative      | 0             | 0           | Primary              |
| 201402442        | invasive ductal carcinoma | positive      | 90            | positive      | 60            | 2           | Primary              |

| Pathology_Number | Diagnosis                        | ER positivity | ER percentage | PR positivity | PR percentage | Her-2 score | Primary or Recurrent |
|------------------|----------------------------------|---------------|---------------|---------------|---------------|-------------|----------------------|
| 201402443        | invasive lobular carcinoma       | positive      | 85            | positive      | 95            | 2           | Primary              |
| 201402523        | invasive ductal carcinoma        | positive      | 90            | positive      | 30            | 2           | Primary              |
| 201402603        | invasive ductal carcinoma        | None          | None          | None          | None          | None        | Primary              |
| 201402689        | invasive ductal carcinoma        | negative      | 0             | negative      | 0             | 3           | Primary              |
| 201402693        | invasive ductal carcinoma        | negative      | 0             | None          | None          | 3           | Primary              |
| 201402694        | invasive ductal carcinoma        | None          | None          | None          | None          | None        | Primary              |
| 201402770        | invasive ductal carcinoma        | negative      | 0             | negative      | 0             | 3           | Primary              |
| 201402771        | invasive ductal carcinoma        | negative      | 0             | negative      | 0             | 3           | Primary              |
| 201402848        | invasive ductal carcinoma        | positive      | 55            | positive      | 55            | 2           | Primary              |
| 201402860        | invasive ductal carcinoma        | negative      | 0             | negative      | 0             | 3           | Primary              |
| 201403032        | invasive ductal carcinoma        | positive      | 90            | positive      | 85            | 1           | Primary              |
| 201403033        | invasive ductal carcinoma        | negative      | 0             | negative      | 0             | 3           | Primary              |
| 201403243        | invasive ductal carcinoma        | positive      | 95            | positive      | 40            | 1           | Primary              |
| 201403245        | invasive ductal carcinoma        | positive      | 95            | negative      | 0             | 1           | Primary              |
| 201403413        | invasive ductal carcinoma        | positive      | 99            | positive      | 99            | 1           | Primary              |
| 201403414        | invasive ductal carcinoma        | positive      | 90            | positive      | 98            | 1           | Primary              |
| 201403434        | invasive ductal carcinoma        | negative      | 0             | negative      | 0             | 3           | Primary              |
| 201403489        | invasive ductal carcinoma        | negative      | 0             | negative      | 0             | 3           | Primary              |
| 201403642        | invasive ductal carcinoma        | negative      | 0             | negative      | 0             | 3           | Primary              |
| 201403766        | invasive ductal carcinoma        | positive      | 90            | positive      | 2             | 1           | Primary              |
| 201403768        | invasive ductal carcinoma        | negative      | 0             | negative      | 0             | 3           | Primary              |
| 201403799        | invasive ductal carcinoma        | positive      | 70            | positive      | 15            | 1           | Primary              |
| 201403893        | invasive ductal carcinoma        | positive      | 95            | positive      | 95            | 0           | Primary              |
| 201404103        | invasive ductal carcinoma        | positive      | 95            | positive      | 98            | 0           | Primary              |
| 201404175        | invasive ductal carcinoma        | positive      | 95            | positive      | 25            | 3           | Primary              |
| 201404230        | invasive ductal carcinoma        | positive      | 90            | positive      | 80            | 1           | Primary              |
| 201404232        | invasive ductal carcinoma        | positive      | 90            | negative      | 0             | 2           | Primary              |
| 201404321        | mucinous carcinoma               | positive      | 99            | positive      | 99            | 0           | Primary              |
| 201404506        | invasive ductal carcinoma        | positive      | 95            | positive      | 10            | 1           | Primary              |
| 201404522        | encapsulated papillary carcinoma | positive      | 95            | positive      | 98            | None        | Primary              |
| 201404532        | invasive ductal carcinoma        | positive      |               | positive      | 10            | 2           | Primary              |
| 201404533        | invasive ductal carcinoma        | negative      | 0             | negative      | 0             | 0           | Primary              |
| 201404607        | invasive ductal carcinoma        | negative      | 0             | negative      | 0             | 2           | Primary              |
| 201404715        | invasive ductal carcinoma        | positive      | 98            | negative      | 0             | 1           | Primary              |
| 201404847        | invasive ductal carcinoma        | positive      | 98            | positive      | 70            | 1           | Primary              |
| 201404849        | invasive ductal carcinoma        | positive      | 98            | positive      | 80            | 1           | Primary              |
| 201404852        | invasive ductal carcinoma        | negative      | 0             | negative      | 0             | 0           | Primary              |

| Pathology_Number | Diagnosis                        | ER positivity | ER percentage | PR positivity | PR percentage | Her-2 score | Primary or Recurrent |
|------------------|----------------------------------|---------------|---------------|---------------|---------------|-------------|----------------------|
| 201404860        | invasive ductal carcinoma        | positive      | 98            | positive      | 60            | 1           | Primary              |
| 201405031        | invasive ductal carcinoma        | None          | None          | None          | None          | None        | Primary              |
| 201405098        | invasive ductal carcinoma        | None          | None          | None          | None          | None        | Primary              |
| 201405292        | invasive ductal carcinoma        | positive      | 85            | positive      | 60            | 3           | Primary              |
| 201405423        | invasive ductal carcinoma        | positive      | 100           | negative      | 0             | 2           | Primary              |
| 201405424        | invasive ductal carcinoma        | positive      | 90            | positive      | 30            | 2           | Primary              |
| 201405486        | invasive ductal carcinoma        | positive      | 95            | positive      | 40            | 2           | Primary              |
| 201405545        | invasive ductal carcinoma        | negative      | 0             | negative      | 0             | 0           | Primary              |
| 201405546        | invasive ductal carcinoma        | positive      | 85            | positive      | 98            | 1           | Primary              |
| 201405662        | invasive ductal carcinoma        | positive      | 90            | positive      | 95            | 2           | Primary              |
| 201405666        | invasive ductal carcinoma        | positive      | 95            | positive      | 95            | 1           | Primary              |
| 201405668        | invasive ductal carcinoma        | negative      | 0             | negative      | 0             | 3           | Primary              |
| 201405827        | invasive ductal carcinoma        | negative      | 0             | negative      | 0             | 2           | Primary              |
| 201406049        | invasive ductal carcinoma        | negative      | 0             | negative      | 0             | 3           | Primary              |
| 201406065        | invasive ductal carcinoma        | negative      | 0             | negative      | 0             | 3           | Primary              |
| 201406066        | invasive ductal carcinoma        | positive      | 55            | positive      | 2             | 1           | Primary              |
| 201406067        | invasive ductal carcinoma        | negative      | 0             | negative      | 0             | 3           | Primary              |
| 201406159        | invasive ductal carcinoma        | negative      | 0             | negative      | 0             | 3           | Primary              |
| 201406343        | invasive ductal carcinoma        | positive      | 95            | positive      | 95            | 2           | Primary              |
| 201406344        | invasive ductal carcinoma        | positive      | 90            | positive      | 5             | 2           | Primary              |
| 201406439        | mucinous carcinoma               | positive      | 60            | negative      | 0             | 0           | Primary              |
| 201406619        | invasive ductal carcinoma        | positive      | 45            | positive      | 2             | 3           | Primary              |
| 201406623        | mucinous carcinoma               | None          | None          | None          | None          | None        | Primary              |
| 201406649        | invasive ductal carcinoma        | negative      | 0             | negative      | 0             | None        | Primary              |
| 201406790        | invasive ductal carcinoma        | negative      | 0             | negative      | 0             | 0           | Primary              |
| 201406866        | invasive ductal carcinoma        | negative      | 0             | negative      | 0             | 3           | Primary              |
| 201406872        | invasive ductal carcinoma        | negative      | 0             | negative      | 0             | 3           | Primary              |
| 201406873        | invasive ductal carcinoma        | positive      | 60            | positive      | 10            | 3           | Primary              |
| 201406874        | invasive ductal carcinoma        | positive      | 70            | positive      | 30            | 1           | Primary              |
| 201406990        | invasive ductal carcinoma        | positive      | 90            | positive      | 5             | 1           | Primary              |
| 201406991        | invasive ductal carcinoma        | negative      | 0             | negative      | 0             | 3           | Primary              |
| 201407056        | invasive lobular carcinoma       | positive      | 40            | positive      | 90            | 0           | Primary              |
| 201407148        | invasive ductal carcinoma        | positive      | 100           | positive      | 95            | 1           | Primary              |
| 201407149        | encapsulated papillary carcinoma | positive      | 98            | positive      | 70            | 1           | Primary              |
| 201407160        | invasive ductal carcinoma        | negative      | 0             | negative      | 0             | 2           | Primary              |
| 201407166        | mucinous carcinoma               | positive      |               | positive      | 20            | 2           | Primary              |
| 201407199        | invasive ductal carcinoma        | negative      | 0             | negative      | 0             | 0           | Primary              |

| Pathology_Number | Diagnosis                  | ER positivity | ER percentage | PR positivity | PR percentage | Her-2 score | Primary or Recurrent |
|------------------|----------------------------|---------------|---------------|---------------|---------------|-------------|----------------------|
| 201407200        | invasive ductal carcinoma  | negative      | 0             | negative      | 0             | 0           | Primary              |
| 201407321        | invasive ductal carcinoma  | positive      | 95            | positive      | 10            | 0           | Primary              |
| 201407365        | invasive ductal carcinoma  | positive      | 95            | positive      | 40            | 2           | Primary              |
| 201407366        | invasive ductal carcinoma  | positive      | 98            | positive      | 60            | 1           | Primary              |
| 201407367        | invasive ductal carcinoma  | None          | None          | None          | None          | None        | Primary              |
| 201407508        | invasive ductal carcinoma  | negative      | 0             | negative      | 0             | 3           | Primary              |
| 201407511        | invasive ductal carcinoma  | positive      | 2             | negative      | 0             | 2           | Primary              |
| 201407664        | invasive ductal carcinoma  | positive      | 98            | positive      | 20            | 1           | Primary              |
| 201407772        | invasive ductal carcinoma  | positive      | 95            | positive      | 95            | 0           | Primary              |
| 201407866        | invasive ductal carcinoma  | None          | None          | None          | None          | None        | Primary              |
| 201407868        | invasive ductal carcinoma  | None          | None          | None          | None          | None        | Primary              |
| 201407897        | invasive ductal carcinoma  | None          | None          | None          | None          | None        | Primary              |
| 201408225        | invasive ductal carcinoma  | positive      | 95            | positive      | 95            | 1           | Primary              |
| 201408226        | invasive ductal carcinoma  | negative      | 0             | negative      | 0             | 0           | Primary              |
| 201408330        | invasive ductal carcinoma  | positive      | 80            | positive      | 13            | 2           | Primary              |
| 201408332        | invasive ductal carcinoma  | negative      | 0             | negative      | 0             | 0           | Primary              |
| 201408333        | invasive ductal carcinoma  | positive      | 90            | negative      | 0             | 0           | Primary              |
| 201408394        | invasive lobular carcinoma | positive      | 95            | positive      | 10            | 1           | Primary              |
| 201408397        | invasive ductal carcinoma  | positive      | 99            | positive      | 95            | 1           | Primary              |
| 201408474        | invasive ductal carcinoma  | positive      | 60            | positive      | 30            | 1           | Primary              |
| 201408713        | invasive ductal carcinoma  | positive      | 60            | positive      | 80            | 1           | Primary              |
| 201408722        | invasive ductal carcinoma  | positive      | 30            | negative      | 0             | 1           | Primary              |
| 201408838        | invasive ductal carcinoma  | positive      | 90            | positive      | 80            | 2           | Primary              |
| 201408839        | invasive ductal carcinoma  | negative      | 0             | negative      | 0             | 3           | Recurrent            |
| 201408956        | invasive lobular carcinoma | positive      | 90            | positive      | 15            | 0           | Primary              |
| 201409043        | mucinous carcinoma         | positive      | 90            | positive      | 98            | 0           | Primary              |
| 201409086        | invasive ductal carcinoma  | positive      | 35            | positive      | 70            | 0           | Primary              |
| 201409242        | invasive ductal carcinoma  | positive      | 98            | positive      | 90            | 0           | Primary              |
| 201409421        | invasive ductal carcinoma  | positive      | 40            | positive      | 5             | 1           | Primary              |
| 201409569        | invasive ductal carcinoma  | positive      | 98            | positive      | 98            | 2           | Primary              |
| 201409587        | invasive mammary carcinoma | negative      | 0             | negative      | 0             | 0           | Primary              |
| 201409591        | invasive ductal carcinoma  | positive      | 98            | positive      | 98            | 2           | Primary              |
| 201409666        | invasive ductal carcinoma  | negative      | 0             | negative      | 0             | 1           | Primary              |
| 201409786        | invasive ductal carcinoma  | negative      | 0             | negative      | 0             | 2           | Recurrent            |
| 201409804        | invasive ductal carcinoma  | positive      | 80            | positive      | 10            | 2           | Primary              |
| 201409865        | invasive ductal carcinoma  | positive      | 98            | positive      | 3             | 2           | Primary              |
| 201409867        | invasive ductal carcinoma  | positive      | 65            | positive      | 95            | 1           | Primary              |
| 201409870        | invasive ductal carcinoma  | positive      | 99            | positive      | 99            | 1           | Primary              |

| Pathology_Number | Diagnosis                             | ER positivity | ER percentage | PR positivity | PR percentage | Her-2 score | Primary or Recurrent |
|------------------|---------------------------------------|---------------|---------------|---------------|---------------|-------------|----------------------|
| 201410060        | invasive ductal carcinoma             | negative      | 0             | negative      | 0             | 1           | Primary              |
| 201410102        | invasive ductal carcinoma             | positive      | 95            | positive      | 95            | 1           | Primary              |
| 201410235        | invasive ductal carcinoma             | positive      | 20            | negative      | 0             | 1           | Primary              |
| 201410320        | invasive ductal carcinoma             | positive      | 100           | positive      | 98            | 0           | Primary              |
| 201410426        | invasive ductal carcinoma             | positive      | 95            | positive      | 100           | 1           | Primary              |
| 201410572        | mucinous carcinoma                    | positive      | 99            | negative      | 0             | 0           | Recurrent            |
| 201410888        | encapsulated papillary carcinoma      | positive      | 95            | positive      | 90            | 0           | Primary              |
| 201410940        | invasive ductal carcinoma             | positive      | 20            | negative      | 0             | 3           | Primary              |
| 201411067        | invasive ductal carcinoma             | positive      | 99            | positive      | 90            | 0           | Primary              |
| 201411068        | invasive lobular carcinoma            | positive      | 90            | positive      | 5             | 0           | Primary              |
| 201411202        | invasive ductal carcinoma             | negative      | 0             | negative      | 0             | 3           | Primary              |
| 201411223        | invasive ductal carcinoma             | negative      | 0             | negative      | 0             | 2           | Primary              |
| 201411277        | invasive ductal carcinoma             | positive      | 95            | negative      | 0             | 1           | Primary              |
| 201411419        | invasive ductal carcinoma             | negative      | 0             | negative      | 0             | 3           | Primary              |
| 201411422        | invasive ductal carcinoma             | positive      | 95            | positive      | 65            | 3           | Primary              |
| 201411586        | invasive ductal carcinoma             | positive      | 90            | positive      | 60            | 2           | Primary              |
| 201411658        | invasive ductal carcinoma             | negative      | 0             | negative      | 0             | 3           | Primary              |
| 201411662        | invasive mammary carcinoma            | positive      | 99            | positive      | 45            | 1           | Primary              |
| 201411748        | invasive lobular carcinoma            | negative      | 0             | negative      | 0             | 1           | Primary              |
| 201411749        | invasive ductal carcinoma             | positive      | 95            | positive      | 95            | 0           | Primary              |
| 201411750        | invasive ductal carcinoma             | positive      | 95            | positive      | 98            | 0           | Primary              |
| 201411855        | invasive ductal carcinoma             | negative      | 0             | negative      | 0             | 2           | Primary              |
| 201412023        | invasive ductal carcinoma             | positive      | 98            | positive      | 98            | 1           | Primary              |
| 201412070        | invasive ductal carcinoma             | negative      | 0             | negative      | 0             | 3           | Primary              |
| 201412490        | invasive ductal carcinoma             | positive      | 95            | negative      | 0             | 0           | Primary              |
| 201412593        | invasive ductal carcinoma             | negative      | 0             | negative      | 0             | 0           | Primary              |
| 201412613        | invasive ductal carcinoma             | positive      | 90            | positive      | 95            | 1           | Primary              |
| 201412641        | invasive ductal carcinoma             | positive      | 2             | negative      | 0             | 0           | Primary              |
| 201412842        | invasive ductal carcinoma             | positive      | 90            | positive      | 7             | 1           | Primary              |
| 201412844        | invasive ductal carcinoma             | positive      | 90            | positive      | 80            | 2           | Primary              |
| 201412854        | invasive ductal carcinoma             | positive      | 95            | positive      | 30            | 1           | Primary              |
| 201413027        | invasive ductal carcinoma             | positive      | 55            | negative      | 0             | 1           | Primary              |
| 201413028        | invasive carcinoma of no special type | negative      | 0             | negative      | 0             | 0           | Primary              |
| 201413194        | invasive ductal carcinoma             | positive      | 95            | positive      | 70            | 2           | Primary              |
| 201413344        | invasive ductal carcinoma             | positive      | 70            | positive      | 5             | 1           | Primary              |
| 201413569        | invasive ductal carcinoma             | positive      | 95            | positive      | 95            | 1           | Primary              |
| 201413687        | invasive ductal carcinoma             | positive      | 95            | positive      | 85            | 3           | Primary              |



| Pathology_Number | Diagnosis                        | ER positivity | ER percentage | PR positivity | PR percentage | Her-2 score | Primary or Recurrent |
|------------------|----------------------------------|---------------|---------------|---------------|---------------|-------------|----------------------|
| 201413688        | invasive ductal carcinoma        | positive      | 95            | positive      | 10            | 1           | Primary              |
| 201413689        | invasive ductal carcinoma        | positive      | 95            | positive      | 95            | 1           | Primary              |
| 201413739        | invasive ductal carcinoma        | positive      | 80            | positive      | 98            | 0           | Primary              |
| 201413855        | invasive ductal carcinoma        | positive      | 95            | negative      | 0             | 0           | Primary              |
| 201413902        | invasive ductal carcinoma        | None          | None          | None          | None          | None        | Primary              |
| 201414012        | invasive ductal carcinoma        | positive      | 98            | positive      | 60            | 1           | Primary              |
| 201414029        | invasive ductal carcinoma        | positive      | 45            | positive      | 5             | 2           | Primary              |
| 201414200        | invasive lobular carcinoma       | positive      | 30            | positive      | 95            | 0           | Primary              |
| 201414355        | invasive ductal carcinoma        | positive      | 98            | negative      | 0             | 2           | Primary              |
| 201414462        | invasive ductal carcinoma        | positive      | 90            | positive      | 60            | 3           | Primary              |
| 201414475        | invasive ductal carcinoma        | positive      |               | positive      |               | 3           | Recurrent            |
| 201414564        | invasive ductal carcinoma        | negative      | 0             | positive      |               | 2           | Primary              |
| 201414825        | invasive ductal carcinoma        | positive      | 90            | positive      | 95            | 2           | Primary              |
| 201414829        | invasive ductal carcinoma        | positive      | 55            | positive      | 3             | 1           | Primary              |
| 201415021        | invasive ductal carcinoma        | negative      | 0             | negative      | 0             | 1           | Primary              |
| 201415024        | invasive ductal carcinoma        | positive      | 70            | positive      | 70            | 2           | Primary              |
| 201415086        | encapsulated papillary carcinoma | positive      | 80            | negative      | 0             | 0           | Primary              |
| 201415226        | mucinous carcinoma               | positive      | 98            | positive      | 95            | None        | Primary              |
| 201415508        | invasive ductal carcinoma        | positive      | 98            | negative      | 0             | 3           | Primary              |
| 201415527        | invasive ductal carcinoma        | positive      | 90            | negative      | 0             | 2           | Primary              |
| 201415692        | invasive ductal carcinoma        | positive      | 85            | positive      | 10            | 2           | Primary              |
| 201415695        | invasive ductal carcinoma        | positive      | 98            | positive      | 90            | 2           | Primary              |
| 201415735        | encapsulated papillary carcinoma | positive      |               | positive      |               | 0           | Primary              |
| 201415881        | invasive ductal carcinoma        | positive      | 98            | positive      | 95            | 2           | Primary              |
| 201415904        | invasive mammary carcinoma       | positive      | 85            | negative      | 0             | 3           | Primary              |
| 201415983        | invasive ductal carcinoma        | positive      | 98            | positive      | 85            | 2           | Primary              |
| 201416103        | invasive ductal carcinoma        | positive      | 85            | positive      | 3             | 2           | Primary              |
| 201416141        | invasive ductal carcinoma        | negative      | 0             | negative      | 0             | 2           | Primary              |
| 201416258        | mucinous carcinoma               | positive      | 98            | positive      | 65            | 2           | Primary              |
| 201416524        | invasive ductal carcinoma        | positive      | 95            | positive      | 15            | 2           | Primary              |
| 201416526        | invasive mammary carcinoma       | positive      | 10            | negative      | 0             | 0           | Primary              |
| 201416531        | invasive ductal carcinoma        | negative      | 0             | negative      | 0             | 1           | Primary              |
| 201416779        | invasive ductal carcinoma        | positive      | 75            | positive      | 60            | 2           | Primary              |
| 201416898        | invasive mammary carcinoma       | positive      | 98            | positive      | 65            | 2           | Primary              |
| 201416907        | invasive ductal carcinoma        | positive      | 98            | positive      | 3             | 1           | Primary              |
| 201417084        | invasive lobular carcinoma       | positive      | 95            | positive      | 95            | 1           | Primary              |
| 201417164        | invasive ductal carcinoma        | positive      | 95            | positive      | 98            | 1           | Primary              |

| Pathology_Number | Diagnosis                  | ER positivity | ER percentage | PR positivity | PR percentage | Her-2 score | Primary or Recurrent |
|------------------|----------------------------|---------------|---------------|---------------|---------------|-------------|----------------------|
| 201417244        | invasive ductal carcinoma  | positive      | 98            | positive      | 60            | 2           | Primary              |
| 201417252        | invasive ductal carcinoma  | positive      | 70            | negative      | 0             | 3           | Primary              |
| 201417275        | invasive ductal carcinoma  | positive      | 80            | positive      | 5             | 2           | Primary              |
| 201417337        | invasive ductal carcinoma  | positive      | 90            | positive      | 45            | 2           | Primary              |
| 201417357        | invasive ductal carcinoma  | positive      | 95            | negative      | 0             | 3           | Primary              |
| 201417459        | invasive ductal carcinoma  | negative      | 0             | negative      | 0             | 3           | Primary              |
| 201417476        | invasive ductal carcinoma  | positive      | 80            | positive      | 5             | 2           | Primary              |
| 201417596        | invasive ductal carcinoma  | None          | None          | None          | None          | None        | Primary              |
| 201417599        | invasive ductal carcinoma  | negative      | 0             | negative      | 0             | 1           | Primary              |
| 201417688        | invasive lobular carcinoma | positive      | 98            | positive      | 90            | 0           | Primary              |
| 201417703        | invasive ductal carcinoma  | None          | None          | None          | None          | None        | Primary              |
| 201417750        | invasive ductal carcinoma  | positive      | 98            | positive      | 98            | 0           | Primary              |
| 201417852        | invasive ductal carcinoma  | positive      | 90            | positive      | 80            | 1           | Primary              |
| 201417882        | mucinous carcinoma         | positive      | 100           | positive      | 55            | 2           | Primary              |
| 201417883        | invasive ductal carcinoma  | negative      | 0             | negative      | 0             | 2           | Primary              |
| 201417927        | invasive ductal carcinoma  | positive      | 95            | positive      | 95            | 1           | Primary              |
| 201418059        | invasive ductal carcinoma  | negative      | 0             | negative      | 0             | 2           | Primary              |
| 201418219        | invasive ductal carcinoma  | positive      | 96            | positive      | 2             | 2           | Primary              |
| 201418254        | invasive ductal carcinoma  | positive      | 70            | positive      | 55            | 2           | Primary              |
| 201418256        | invasive ductal carcinoma  | negative      | 0             | negative      | 0             | 3           | Primary              |
| 201418393        | invasive ductal carcinoma  | positive      | 90            | positive      | 20            | 2           | Primary              |
| 201418395        | invasive ductal carcinoma  | positive      | 98            | positive      | 98            | 1           | Primary              |
| 201418396        | invasive ductal carcinoma  | positive      | 98            | positive      | 45            | 2           | Primary              |
| 201418549        | invasive ductal carcinoma  | positive      | 95            | positive      | 95            | 3           | Primary              |
| 201418641        | invasive mammary carcinoma | positive      | 95            | positive      | 90            | 1           | Primary              |
| 201418698        | invasive lobular carcinoma | positive      | 95            | negative      | 0             | 3           | Primary              |
| 201418801        | invasive ductal carcinoma  | positive      | 99            | positive      | 20            | 2           | Primary              |
| 201418821        | mucinous carcinoma         | positive      | 99            | positive      | 95            | 1           | Primary              |
| 201418868        | invasive ductal carcinoma  | negative      | 0             | negative      | 0             | 2           | Primary              |
| 201418869        | invasive ductal carcinoma  | positive      | 30            | positive      | 90            | 3           | Primary              |
| 201419040        | invasive ductal carcinoma  | negative      | 0             | negative      | 0             | 3           | Primary              |
| 201419103        | invasive ductal carcinoma  | positive      | 33            | positive      | 25            | 0           | Primary              |
| 201419195        | mucinous carcinoma         | positive      | 95            | positive      | 100           | 0           | Primary              |
| 201419196        | invasive ductal carcinoma  | negative      | 0             | negative      | 0             | 2           | Primary              |
| 201419397        | invasive ductal carcinoma  | positive      | 99            | positive      | 70            | 2           | Primary              |
| 201419446        | invasive ductal carcinoma  | None          | None          | None          | None          | None        | Primary              |
| 201419529        | invasive ductal carcinoma  | positive      | 90            | positive      | 90            | 1           | Primary              |
| 201419531        | invasive mammary carcinoma | negative      | 0             | negative      | 0             | 2           | Primary              |

| Pathology_Number | Diagnosis                  | ER positivity | ER percentage | PR positivity | PR percentage | Her-2 score | Primary or Recurrent |
|------------------|----------------------------|---------------|---------------|---------------|---------------|-------------|----------------------|
| 201419733        | mucinous carcinoma         | None          | None          | None          | None          | None        | Primary              |
| 201419855        | invasive ductal carcinoma  | positive      | 70            | positive      | 20            | 2           | Primary              |
| 201419869        | invasive ductal carcinoma  | negative      | 0             | negative      | 0             | 3           | Primary              |
| 201420275        | invasive ductal carcinoma  | positive      | 5             | negative      | 0             | 3           | Primary              |
| 201420276        | invasive ductal carcinoma  | negative      | 0             | negative      | 0             | 3           | Primary              |
| 201420277        | invasive ductal carcinoma  | positive      | 85            | positive      | 95            | 1           | Primary              |
| 201420329        | invasive lobular carcinoma | positive      | 90            | negative      | 0             | 1           | Primary              |
| 201420510        | invasive ductal carcinoma  | negative      | 0             | negative      | 0             | 3           | Primary              |
| 201420582        | invasive ductal carcinoma  | None          | None          | None          | None          | None        | Primary              |
| 201420583        | invasive ductal carcinoma  | negative      | 0             | negative      | 0             | 0           | Primary              |
| 201420584        | invasive ductal carcinoma  | positive      | 25            | negative      | 0             | 3           | Primary              |
| 201420585        | mucinous carcinoma         | None          | None          | None          | None          | None        | Primary              |
| 201420665        | invasive ductal carcinoma  | positive      | 90            | positive      | 60            | 1           | Primary              |
| 201420749        | invasive ductal carcinoma  | positive      | 98            | negative      | 0             | 1           | Primary              |
| 201420868        | invasive ductal carcinoma  | positive      | 80            | positive      | 95            | 1           | Primary              |
| 201420870        | invasive ductal carcinoma  | positive      | 100           | positive      | 98            | 1           | Primary              |
| 201420871        | invasive ductal carcinoma  | negative      | 0             | negative      | 0             | 3           | Primary              |
| 201420872        | invasive ductal carcinoma  | negative      | 0             | negative      | 0             | 3           | Primary              |
| 201420873        | invasive ductal carcinoma  | positive      | 40            | positive      | 40            | 1           | Primary              |
| 201421038        | invasive ductal carcinoma  | positive      | 55            | negative      | 0             | 3           | Primary              |
| 201421043        | invasive ductal carcinoma  | positive      | 90            | positive      | 10            | 1           | Primary              |
| 201421149        | invasive ductal carcinoma  | None          | None          | None          | None          | None        | Primary              |
| 201421268        | invasive ductal carcinoma  | negative      | 0             | negative      | 0             | 3           | Primary              |
| 201421314        | invasive ductal carcinoma  | negative      | 0             | negative      | 0             | 3           | Primary              |
| 201421330        | invasive ductal carcinoma  | negative      | 0             | negative      | 0             | 0           | Primary              |
| 201421599        | invasive mammary carcinoma | positive      | 98            | positive      | 90            | 1           | Primary              |
| 201421600        | invasive ductal carcinoma  | positive      | 99            | positive      | 90            | 1           | Primary              |
| 201421601        | invasive ductal carcinoma  | positive      | 85            | negative      | 0             | 1           | Primary              |
| 201421603        | invasive ductal carcinoma  | positive      |               | negative      | 0             | 2           | Primary              |
| 201421714        | invasive mammary carcinoma | negative      | 0             | negative      | 0             | 2           | Primary              |
| 201421715        | invasive ductal carcinoma  | positive      | 98            | negative      | 0             | 1           | Primary              |
| 201421731        | invasive ductal carcinoma  | positive      | 98            | positive      | 98            | 1           | Primary              |
| 201421775        | invasive ductal carcinoma  | positive      | 98            | positive      | 80            | 0           | Primary              |
| 201421831        | invasive ductal carcinoma  | negative      | 0             | negative      | 0             | 3           | Primary              |
| 201422146        | invasive ductal carcinoma  | positive      | 98            | positive      | 55            | 1           | Primary              |
| 201422147        | invasive ductal carcinoma  | positive      | 65            | positive      | 80            | 1           | Primary              |
| 201422328        | invasive ductal carcinoma  | positive      | 75            | negative      | 0             | 3           | Recurrent            |
| 201422332        | invasive ductal carcinoma  | positive      | 90            | positive      | 80            | 3           | Primary              |

| Pathology_Number | Diagnosis                  | ER positivity | ER percentage | PR positivity | PR percentage | Her-2 score | Primary or Recurrent |
|------------------|----------------------------|---------------|---------------|---------------|---------------|-------------|----------------------|
| 201422333        | invasive ductal carcinoma  | negative      | 0             | negative      | 0             | 3           | Primary              |
| 201422477        | invasive ductal carcinoma  | negative      | 0             | negative      | 0             | 3           | Primary              |
| 201422517        | invasive ductal carcinoma  | negative      | 0             | negative      | 0             | 3           | Primary              |
| 201422630        | mucinous carcinoma         | positive      | 100           | positive      | 90            | 2           | Primary              |
| 201422631        | invasive ductal carcinoma  | positive      | 90            | positive      | 90            | 2           | Primary              |
| 201422648        | invasive ductal carcinoma  | positive      | 10            | positive      | 7             | 3           | Primary              |
| 201422663        | invasive ductal carcinoma  | positive      | 90            | positive      | 70            | 3           | Primary              |
| 201422664        | invasive ductal carcinoma  | positive      | 90            | positive      | 80            | 1           | Primary              |
| 201422665        | invasive ductal carcinoma  | negative      | 0             | negative      | 0             | 3           | Primary              |
| 201422794        | invasive ductal carcinoma  | positive      | 100           | negative      | 0             | 1           | Primary              |
| 201422832        | invasive ductal carcinoma  | positive      | 100           | positive      | 55            | None        | Primary              |
| 201422935        | invasive ductal carcinoma  | positive      | 90            | positive      | 20            | 1           | Primary              |
| 201422945        | invasive ductal carcinoma  | positive      | 98            | positive      | 98            | 0           | Primary              |
| 201423049        | invasive ductal carcinoma  | positive      | 85            | positive      | 30            | 1           | Primary              |
| 201423132        | invasive ductal carcinoma  | negative      | 0             | negative      | 0             | 3           | Primary              |
| 201423163        | invasive ductal carcinoma  | negative      | 0             | negative      | 0             | 2           | Primary              |
| 201423199        | invasive ductal carcinoma  | positive      |               | positive      |               | 0           | Primary              |
| 201423200        | invasive ductal carcinoma  | negative      | 0             | negative      | 0             | None        | Primary              |
| 201423206        | invasive ductal carcinoma  | positive      |               | positive      |               | 1           | Primary              |
| 201423207        | invasive ductal carcinoma  | negative      | 0             | negative      | 0             | 3           | Primary              |
| 201423208        | invasive ductal carcinoma  | negative      | 0             | negative      | 0             | 2           | Primary              |
| 201423439        | invasive ductal carcinoma  | positive      | 80            | negative      | 0             | 0           | Primary              |
| 201423440        | invasive ductal carcinoma  | positive      | 90            | positive      | 35            | 2           | Primary              |
| 201423637        | invasive ductal carcinoma  | positive      |               | positive      |               | 1           | Primary              |
| 201423639        | invasive ductal carcinoma  | negative      | 0             | negative      | 0             | 3           | Primary              |
| 201423640        | invasive ductal carcinoma  | positive      |               | positive      |               | 2           | Primary              |
| 201423728        | invasive ductal carcinoma  | positive      | 98            | negative      | 0             | 2           | Primary              |
| 201423813        | invasive ductal carcinoma  | negative      | 0             | negative      | 0             | 3           | Primary              |
| 201423904        | invasive ductal carcinoma  | positive      | 5             | positive      | 98            | 2           | Primary              |
| 201424124        | invasive ductal carcinoma  | positive      | 90            | positive      | 90            | 1           | Primary              |
| 201424126        | invasive ductal carcinoma  | positive      | 85            | positive      | 85            | 2           | Primary              |
| 201424128        | invasive ductal carcinoma  | negative      | 0             | negative      | 0             | 3           | Primary              |
| 201424130        | invasive ductal carcinoma  | positive      | 98            | positive      | 15            | 2           | Primary              |
| 201424131        | invasive ductal carcinoma  | positive      | 65            | negative      | 0             | 2           | Primary              |
| 201424141        | invasive ductal carcinoma  | negative      | 0             | negative      | 0             | 2           | Primary              |
| 201424226        | invasive ductal carcinoma  | None          | None          | None          | None          | 3           | Primary              |
| 201424354        | invasive ductal carcinoma  | positive      | 98            | positive      | 98            | 1           | Primary              |
| 201424356        | invasive mammary carcinoma | positive      | 100           | positive      | 100           | 1           | Primary              |

| Pathology_Number | Diagnosis                        | ER positivity | ER percentage | PR positivity | PR percentage | Her-2 score | Primary or Recurrent |
|------------------|----------------------------------|---------------|---------------|---------------|---------------|-------------|----------------------|
| 201424357        | invasive ductal carcinoma        | negative      | 0             | negative      | 0             | 3           | Primary              |
| 201424699        | invasive ductal carcinoma        | positive      | 98            | positive      | 40            | 2           | Primary              |
| 201424728        | invasive ductal carcinoma        | negative      | 0             | negative      | 0             | 3           | Primary              |
| 201424834        | mucinous carcinoma               | positive      | 100           | negative      | 0             | 1           | Primary              |
| 201424835        | encapsulated papillary carcinoma | positive      | 98            | positive      | 90            | 2           | Primary              |
| 201424836        | invasive ductal carcinoma        | positive      | 95            | positive      | 35            | 1           | Primary              |
| 201424837        | invasive ductal carcinoma        | None          | None          | None          | None          | None        | Primary              |
| 201424838        | invasive ductal carcinoma        | positive      | 70            | negative      | 0             | 3           | Primary              |
| 201424847        | invasive ductal carcinoma        | positive      | 90            | positive      | 98            | 0           | Primary              |
| 201424914        | invasive ductal carcinoma        | positive      | 90            | positive      | 98            | 2           | Primary              |
| 201425115        | invasive ductal carcinoma        | positive      | 60            | negative      | 0             | 0           | Primary              |
| 201425117        | invasive ductal carcinoma        | positive      | 85            | negative      | 0             | 2           | Primary              |
| 201425228        | invasive ductal carcinoma        | positive      | 40            | positive      | 2             | 1           | Primary              |
| 201425312        | invasive ductal carcinoma        | positive      | 95            | negative      | 0             | 1           | Primary              |
| 201425323        | invasive ductal carcinoma        | positive      | 30            | positive      | 15            | 3           | Primary              |
| 201425327        | invasive lobular carcinoma       | negative      | 0             | positive      | 80            | 2           | Primary              |
| 201425389        | invasive ductal carcinoma        | positive      | 80            | positive      | 90            | 0           | Primary              |
| 201425513        | invasive ductal carcinoma        | positive      | 95            | positive      | 98            | 1           | Primary              |
| 201425527        | invasive ductal carcinoma        | positive      | 65            | positive      | 70            | 2           | Primary              |
| 201425528        | invasive ductal carcinoma        | positive      | 90            | positive      | 55            | 1           | Primary              |
| 201425691        | invasive ductal carcinoma        | positive      | 80            | negative      | 0             | 2           | Primary              |
| 201425693        | invasive ductal carcinoma        | positive      | 90            | positive      | 80            | 1           | Primary              |
| 201425847        | invasive ductal carcinoma        | negative      | 0             | negative      | 0             | 0           | Primary              |
| 201425848        | invasive ductal carcinoma        | positive      | 90            | positive      | 80            | 3           | Primary              |
| 201426017        | invasive ductal carcinoma        | negative      | 0             | negative      | 0             | 1           | Primary              |
| 201426131        | invasive ductal carcinoma        | positive      | 80            | negative      | 0             | 3           | Primary              |
| 201426291        | invasive ductal carcinoma        | positive      | 95            | positive      | 60            | 1           | Primary              |
| 201426328        | invasive ductal carcinoma        | positive      | 95            | negative      | 0             | 2           | Primary              |
| 201426521        | invasive ductal carcinoma        | positive      | 80            | positive      | 20            | 2           | Primary              |
| 201426541        | invasive ductal carcinoma        | negative      | 0             | negative      | 0             | 3           | Primary              |
| 201426872        | invasive ductal carcinoma        | positive      | 55            | negative      | 0             | 1           | Primary              |
| 201426942        | metaplastic carcinoma            | negative      | 0             | negative      | 0             | 0           | Primary              |
| 201427078        | invasive ductal carcinoma        | positive      | 80            | positive      | 90            | 3           | Primary              |
| 201427081        | invasive ductal carcinoma        | positive      | 98            | positive      | 70            | 0           | Primary              |
| 201427123        | invasive ductal carcinoma        | positive      |               | positive      |               | 1           | Primary              |
| 201427317        | invasive ductal carcinoma        | positive      | 98            | positive      | 30            | 2           | Primary              |
| 201427318        | invasive ductal carcinoma        | positive      | 98            | negative      | 0             | 3           | Primary              |

| Pathology_Number | Diagnosis                  | ER positivity | ER percentage | PR positivity | PR percentage | Her-2 score | Primary or Recurrent |
|------------------|----------------------------|---------------|---------------|---------------|---------------|-------------|----------------------|
| 201427461        | invasive mammary carcinoma | negative      | 0             | negative      | 0             | 1           | Primary              |
| 201427493        | invasive ductal carcinoma  | negative      | 0             | negative      | 0             | 1           | Primary              |
| 201427521        | invasive ductal carcinoma  | positive      | 60            | negative      | 0             | 3           | Primary              |
| 201427663        | invasive ductal carcinoma  | positive      | 98            | positive      | 50            | 0           | Primary              |
| 201427737        | invasive ductal carcinoma  | positive      |               | positive      |               | 1           | Primary              |
| 201427996        | invasive ductal carcinoma  | negative      | 0             | negative      | 0             | 3           | Primary              |
| 201428000        | invasive ductal carcinoma  | positive      | 60            | negative      | 0             | 2           | Primary              |
| 201428087        | invasive ductal carcinoma  | positive      | 80            | positive      | 80            | 1           | Primary              |
| 201428088        | invasive lobular carcinoma | positive      | 10            | positive      | 90            | 1           | Primary              |
| 201428092        | mucinous carcinoma         | positive      | 99            | negative      | 0             | 0           | Primary              |
| 201428093        | invasive ductal carcinoma  | negative      | 0             | negative      | 0             | 1           | Primary              |
| 201428231        | invasive ductal carcinoma  | positive      | 98            | negative      | 0             | 2           | Primary              |
| 201428237        | invasive ductal carcinoma  | negative      | 0             | negative      | 0             | 2           | Primary              |
| 201428238        | invasive ductal carcinoma  | None          | None          | None          | None          | None        | Primary              |
| 201428407        | invasive ductal carcinoma  | positive      | 65            | negative      | 0             | 2           | Primary              |
| 201428410        | invasive ductal carcinoma  | positive      | 98            | positive      | 5             | 2           | Primary              |
| 201428411        | invasive ductal carcinoma  | positive      | 98            | positive      | 98            | 1           | Primary              |
| 201428483        | invasive ductal carcinoma  | positive      | 55            | positive      | 3             | 1           | Primary              |
| 201428577        | invasive ductal carcinoma  | positive      | 90            | negative      | 0             | 2           | Primary              |
| 201428578        | invasive ductal carcinoma  | positive      | 99            | positive      | 45            | 2           | Primary              |
| 201428739        | invasive ductal carcinoma  | positive      | 90            | positive      | 90            | 1           | Primary              |
| 201428933        | invasive ductal carcinoma  | positive      | 99            | negative      | 0             | 2           | Primary              |
| 201428934        | invasive ductal carcinoma  | positive      | 85            | positive      |               | 1           | Primary              |
| 201429313        | invasive ductal carcinoma  | positive      | 98            | positive      | 98            | 3           | Primary              |
| 201429407        | invasive ductal carcinoma  | positive      | 98            | negative      | 0             | 2           | Primary              |
| 201429490        | invasive ductal carcinoma  | positive      | 98            | positive      | 2             | 2           | Primary              |
| 201429492        | invasive mammary carcinoma | positive      | 90            | positive      | 5             | 2           | Primary              |
| 201429504        | invasive ductal carcinoma  | positive      | 99            | positive      | 90            | 0           | Primary              |
| 201429534        | invasive ductal carcinoma  | positive      | 100           | negative      | 0             | 2           | Primary              |
| 201430235        | invasive ductal carcinoma  | positive      | 85            | negative      | 0             | 2           | Primary              |
| 201430312        | invasive ductal carcinoma  | negative      | 0             | negative      | 0             | 3           | Primary              |
| 201430462        | invasive ductal carcinoma  | positive      | 90            | negative      | 0             | 2           | Primary              |
| 201430556        | invasive ductal carcinoma  | positive      | 10            | positive      | 10            | 3           | Primary              |
| 201430559        | invasive mammary carcinoma | positive      | 95            | positive      | 85            | 1           | Primary              |
| 201430560        | invasive ductal carcinoma  | negative      | 0             | negative      | 0             | 3           | Primary              |
| 201430561        | invasive ductal carcinoma  | positive      | 98            | positive      | 90            | 1           | Primary              |
| 201430562        | invasive ductal carcinoma  | negative      | 0             | None          | None          | 3           | Primary              |
| 201430572        | invasive ductal carcinoma  | positive      | 98            | positive      | 2             | 1           | Recurrent            |

| Pathology_Number | Diagnosis                  | ER positivity | ER percentage | PR positivity | PR percentage | Her-2 score | Primary or Recurrent |
|------------------|----------------------------|---------------|---------------|---------------|---------------|-------------|----------------------|
| 201430963        | invasive ductal carcinoma  | None          | None          | negative      | 0             | 3           | Primary              |
| 201431060        | mucinous carcinoma         | positive      | 98            | positive      | 70            | 1           | Primary              |
| 201431127        | invasive ductal carcinoma  | negative      | 0             | negative      | 0             | 2           | Primary              |
| 201431129        | invasive ductal carcinoma  | positive      | 85            | negative      | 0             | 2           | Primary              |
| 201431130        | invasive mammary carcinoma | positive      | 45            | negative      | 0             | 2           | Primary              |
| 201431144        | invasive ductal carcinoma  | positive      | 45            | negative      | 0             | 2           | Primary              |
| 201431246        | invasive ductal carcinoma  | positive      | 98            | positive      | 2             | 1           | Primary              |
| 201431368        | invasive ductal carcinoma  | positive      | 95            | negative      | 0             | 1           | Primary              |
| 201431510        | invasive ductal carcinoma  | positive      | 70            | positive      | 55            | 1           | Primary              |
| 201431679        | invasive ductal carcinoma  | positive      | 70            | positive      | 30            | 2           | Primary              |
| 201431680        | invasive ductal carcinoma  | positive      | 70            | None          | None          | 2           | Primary              |
| 201431682        | invasive ductal carcinoma  | positive      | 90            | positive      | 90            | 1           | Primary              |
| 201431686        | invasive ductal carcinoma  | positive      | 90            | positive      | 98            | 1           | Primary              |
| 201431724        | invasive ductal carcinoma  | negative      | 0             | negative      | 0             | 3           | Primary              |
| 201431725        | invasive ductal carcinoma  | positive      | 95            | positive      | 70            | 1           | Primary              |
| 201431741        | invasive ductal carcinoma  | negative      | 0             | negative      | 0             | 3           | Primary              |
| 201432047        | invasive ductal carcinoma  | positive      | 99            | positive      | 35            | 1           | Primary              |
| 201432048        | invasive ductal carcinoma  | negative      | 0             | negative      | 0             | 3           | Primary              |
| 201432051        | invasive ductal carcinoma  | positive      | 98            | positive      | 55            | 1           | Primary              |
| 201432061        | invasive ductal carcinoma  | positive      | 100           | positive      | 75            | 2           | Primary              |
| 201432087        | invasive ductal carcinoma  | positive      | 3             | negative      | 0             | 3           | Primary              |
| 201432088        | invasive ductal carcinoma  | positive      | 90            | positive      | 15            | 3           | Primary              |
| 201432181        | invasive ductal carcinoma  | positive      | 60            | negative      | 0             | 2           | Primary              |
| 201432204        | invasive ductal carcinoma  | positive      | 60            | positive      | 24            | 1           | Primary              |
| 201432321        | invasive ductal carcinoma  | positive      | 80            | negative      | 0             | 3           | Primary              |
| 201432455        | invasive ductal carcinoma  | negative      | 0             | negative      | 0             | 2           | Primary              |
| 201432456        | invasive mammary carcinoma | positive      | 65            | positive      | 2             | 1           | Primary              |
| 201432502        | invasive ductal carcinoma  | positive      | 98            | positive      | 90            | 2           | Primary              |
| 201432591        | invasive ductal carcinoma  | negative      | 0             | negative      | 0             | 3           | Primary              |
| 201432636        | invasive ductal carcinoma  | negative      | 0             | negative      | 0             | 2           | Primary              |
| 201433220        | invasive ductal carcinoma  | negative      | 0             | negative      | 0             | 1           | Primary              |
| 201433258        | invasive ductal carcinoma  | positive      | 95            | negative      | 0             | 2           | Primary              |
| 201433571        | invasive ductal carcinoma  | positive      | 95            | positive      | 90            | 2           | Primary              |
| 201433642        | invasive ductal carcinoma  | positive      | 45            | positive      | 100           | 1           | Primary              |
| 201433644        | invasive ductal carcinoma  | positive      | 95            | positive      | 70            | 1           | Primary              |
| 201433646        | invasive ductal carcinoma  | positive      | 90            | negative      | 0             | 1           | Primary              |
| 201433674        | invasive ductal carcinoma  | negative      | 0             | negative      | 0             | 3           | Primary              |
| 201433702        | invasive ductal carcinoma  | positive      | 10            | positive      | 40            | 3           | Recurrent            |

| Pathology_Number | Diagnosis                         | ER positivity | ER percentage | PR positivity | PR percentage | Her-2 score | Primary or Recurrent |
|------------------|-----------------------------------|---------------|---------------|---------------|---------------|-------------|----------------------|
| 201433705        | invasive ductal carcinoma         | negative      | 0             | negative      | 0             | 3           | Primary              |
| 201433826        | invasive ductal carcinoma         | positive      | 98            | positive      | 95            | 2           | Primary              |
| 201433830        | invasive ductal carcinoma         | negative      | 0             | negative      | 0             | 3           | Primary              |
| 201433837        | invasive ductal carcinoma         | positive      | 98            | negative      | 0             | 2           | Primary              |
| 201433891        | invasive ductal carcinoma         | positive      | 80            | negative      | 0             | 0           | Primary              |
| 201433948        | invasive ductal carcinoma         | positive      | 98            | positive      | 95            | 1           | Primary              |
| 201434041        | invasive ductal carcinoma         | positive      | 100           | positive      | 80            | 3           | Primary              |
| 201434097        | invasive ductal carcinoma         | positive      | 80            | negative      | 0             | 3           | Primary              |
| 201434251        | invasive ductal carcinoma         | positive      | 99            | positive      | 2             | 3           | Primary              |
| 201434252        | invasive ductal carcinoma         | negative      | 0             | negative      | 0             | 3           | Primary              |
| 201434254        | invasive ductal carcinoma         | positive      | 90            | positive      | 15            | 2           | Primary              |
| 201434255        | invasive ductal carcinoma         | positive      | 10            | negative      | 0             | 3           | Primary              |
| 201434256        | invasive ductal carcinoma         | positive      | 95            | None          | None          | 2           | Primary              |
| 201434373        | invasive ductal carcinoma         | negative      | 0             | negative      | 0             | 3           | Primary              |
| 201434387        | invasive ductal carcinoma         | negative      | 0             | negative      | 0             | 0           | Recurrent            |
| 201434522        | invasive ductal carcinoma         | positive      | 100           | positive      | 3             | 2           | Primary              |
| 201434524        | invasive ductal carcinoma         | positive      | 98            | positive      | 80            | 1           | Primary              |
| 201434712        | invasive ductal carcinoma         | positive      | 99            | positive      | 90            | 1           | Primary              |
| 201434727        | invasive ductal carcinoma         | positive      | 98            | positive      | 10            | 1           | Primary              |
| 201434805        | invasive ductal carcinoma         | positive      | 98            | positive      | 90            | 2           | Primary              |
| 201434806        | invasive ductal carcinoma         | positive      | 98            | positive      | 30            | 1           | Primary              |
| 201434876        | invasive ductal carcinoma         | positive      | 80            | negative      | 0             | 1           | Primary              |
| 201434877        | invasive lobular carcinoma        | positive      | 98            | negative      | 0             | 1           | Primary              |
| 201434882        | invasive ductal carcinoma         | positive      | 98            | positive      | 90            | 0           | Primary              |
| 201434947        | invasive ductal carcinoma         | positive      | 5             | negative      | 0             | 1           | Primary              |
| 201435083        | invasive ductal carcinoma         | positive      | 100           | positive      | 5             | 1           | Primary              |
| 201435238        | invasive ductal carcinoma         | negative      | 0             | negative      | 0             | 1           | Primary              |
| 201435302        | invasive micropapillary carcinoma | positive      |               | positive      | 35            | 0           | Primary              |
| 201435316        | invasive ductal carcinoma         | negative      | 0             | negative      | 0             | 3           | Primary              |
| 201435318        | invasive ductal carcinoma         | None          | None          | None          | None          | None        | Primary              |
| 201435319        | invasive ductal carcinoma         | negative      | 0             | negative      | 0             | 3           | Primary              |
| 201435508        | invasive ductal carcinoma         | negative      | 0             | negative      | 0             | 3           | Primary              |
| 201435669        | solid papillary carcinoma         | positive      | 98            | negative      | 0             | None        | Primary              |
| 201435671        | invasive ductal carcinoma         | negative      | 0             | negative      | 0             | 1           | Primary              |
| 201435672        | mucinous carcinoma                | positive      | 99            | positive      | 99            | 0           | Primary              |
| 201435673        | invasive ductal carcinoma         | negative      | 0             | negative      | 0             | 0           | Primary              |
| 201435674        | invasive ductal carcinoma         | positive      | 99            | positive      | 99            | 0           | Primary              |



| Pathology_Number | Diagnosis                  | ER positivity | ER percentage | PR positivity | PR percentage | Her-2 score | Primary or Recurrent |
|------------------|----------------------------|---------------|---------------|---------------|---------------|-------------|----------------------|
| 201435682        | invasive ductal carcinoma  | positive      | 98            | negative      | 0             | 2           | Primary              |
| 201435683        | invasive ductal carcinoma  | positive      | 98            | positive      | 70            | 2           | Primary              |
| 201435695        | invasive ductal carcinoma  | positive      | 95            | positive      | 100           | 1           | Primary              |
| 201435869        | invasive ductal carcinoma  | positive      | 90            | positive      | 98            | 1           | Primary              |
| 201436054        | solid papillary carcinoma  | positive      | 99            | positive      | 80            | None        | Primary              |
| 201436055        | invasive ductal carcinoma  | positive      | 98            | negative      | 0             | 1           | Primary              |
| 201436064        | invasive ductal carcinoma  | positive      | 98            | positive      | 98            | 0           | Primary              |
| 201436192        | invasive ductal carcinoma  | positive      | 98            | positive      | 5             | 2           | Primary              |
| 201436336        | invasive ductal carcinoma  | positive      | 90            | positive      | 1             | 0           | Primary              |
| 201436342        | invasive ductal carcinoma  | positive      | 90            | negative      | 0             | 0           | Primary              |
| 201436343        | invasive ductal carcinoma  | positive      | 100           | positive      | 5             | 3           | Primary              |
| 201436514        | invasive mammary carcinoma | positive      | 95            | negative      | 0             | 2           | Primary              |
| 201436516        | invasive ductal carcinoma  | positive      | 98            | positive      | 95            | 2           | Primary              |
| 201436518        | invasive ductal carcinoma  | positive      | 80            | positive      | 60            | 1           | Primary              |
| 201436591        | invasive ductal carcinoma  | positive      | 70            | negative      | 0             | 1           | Primary              |
| 201436676        | invasive ductal carcinoma  | negative      | 0             | negative      | 0             | 3           | Primary              |
| 201436677        | invasive ductal carcinoma  | positive      | 95            | negative      | 0             | 3           | Primary              |
| 201436762        | invasive ductal carcinoma  | positive      |               | positive      |               | 0           | Primary              |
| 201436765        | mucinous carcinoma         | positive      | 100           | positive      | 90            | 1           | Primary              |
| 201436766        | invasive ductal carcinoma  | positive      | 90            | positive      | 90            | 3           | Primary              |
| 201437152        | mucinous carcinoma         | positive      | 99            | positive      | 90            | 1           | Primary              |
| 201437154        | invasive ductal carcinoma  | negative      | 0             | negative      | 0             | 2           | Primary              |
| 201437156        | invasive ductal carcinoma  | positive      | 98            | negative      | 0             | 3           | Primary              |
| 201437173        | invasive ductal carcinoma  | positive      | 80            | positive      | 70            | 0           | Primary              |
| 201437282        | invasive ductal carcinoma  | positive      | 99            | positive      | 100           | 1           | Primary              |
| 201437326        | invasive ductal carcinoma  | positive      | 3             | negative      | 0             | 3           | Primary              |
| 201437330        | invasive ductal carcinoma  | negative      | 0             | negative      | 0             | 2           | Primary              |
| 201437532        | mucinous carcinoma         | positive      | 99            | negative      | 0             | 1           | Primary              |
| 201437576        | invasive ductal carcinoma  | negative      | 0             | negative      | 0             | 2           | Primary              |
| 201437578        | solid papillary carcinoma  | positive      | 99            | positive      | 95            | 1           | Primary              |
| 201437669        | invasive ductal carcinoma  | positive      | 99            | negative      | 0             | 1           | Primary              |
| 201437725        | invasive ductal carcinoma  | negative      | 0             | negative      | 0             | 3           | Primary              |
| 201437726        | invasive ductal carcinoma  | positive      | 99            | positive      | 20            | 1           | Primary              |
| 201437881        | invasive ductal carcinoma  | negative      | 0             | negative      | 0             | 0           | Primary              |
| 201438144        | invasive ductal carcinoma  | positive      | 95            | positive      | 95            | 1           | Primary              |
| 201438145        | invasive ductal carcinoma  | positive      |               | negative      | 0             | 0           | Primary              |
| 201438312        | invasive ductal carcinoma  | positive      | 98            | positive      | 98            | 2           | Primary              |
| 201438456        | invasive ductal carcinoma  | negative      | 0             | negative      | 0             | 1           | Primary              |

| Pathology_Number | Diagnosis                  | ER positivity | ER percentage | PR positivity | PR percentage | Her-2 score | Primary or Recurrent |
|------------------|----------------------------|---------------|---------------|---------------|---------------|-------------|----------------------|
| 201438486        | invasive ductal carcinoma  | negative      | 0             | negative      | 0             | 3           | Primary              |
| 201438550        | invasive ductal carcinoma  | positive      |               | positive      |               | 1           | Primary              |
| 201438551        | invasive ductal carcinoma  | positive      | 90            | negative      | 0             | 3           | Primary              |
| 201438864        | solid papillary carcinoma  | positive      | 99            | positive      | 99            | 0           | Primary              |
| 201439069        | invasive ductal carcinoma  | positive      | 95            | positive      | 98            | 1           | Primary              |
| 201439422        | invasive ductal carcinoma  | negative      | 0             | negative      | 0             | 1           | Primary              |
| 201439502        | invasive ductal carcinoma  | negative      | 0             | negative      | 0             | 0           | Primary              |
| 201439663        | invasive ductal carcinoma  | positive      | 99            | negative      | 0             | 1           | Primary              |
| 201439966        | invasive ductal carcinoma  | positive      | 100           | positive      | 100           | 0           | Primary              |
| 201440200        | invasive ductal carcinoma  | positive      | 90            | positive      | 95            | 0           | Primary              |
| 201440202        | invasive ductal carcinoma  | positive      | 99            | positive      | 85            | 2           | Primary              |
| 201440344        | invasive ductal carcinoma  | positive      | 98            | positive      | 70            | 1           | Primary              |
| 201440345        | invasive ductal carcinoma  | positive      | 30            | positive      | 30            | 2           | Primary              |
| 201440347        | invasive ductal carcinoma  | negative      | 0             | negative      | 0             | 3           | Primary              |
| 201440601        | invasive ductal carcinoma  | positive      | 90            | positive      | 85            | 1           | Primary              |
| 201440602        | invasive ductal carcinoma  | negative      | 0             | negative      | 0             | 3           | Primary              |
| 201440604        | invasive ductal carcinoma  | positive      | 95            | positive      | 40            | 2           | Primary              |
| 201440606        | invasive ductal carcinoma  | negative      | 0             | negative      | 0             | 3           | Primary              |
| 201440674        | invasive ductal carcinoma  | positive      | 90            | positive      | 70            | 1           | Primary              |
| 201440854        | invasive ductal carcinoma  | negative      | 0             | negative      | 0             | 0           | Primary              |
| 201440855        | invasive ductal carcinoma  | positive      | 98            | positive      | 10            | 0           | Primary              |
| 201440886        | invasive ductal carcinoma  | positive      | 90            | positive      | 95            | 1           | Primary              |
| 201441253        | invasive ductal carcinoma  | positive      | 99            | positive      | 99            | 2           | Primary              |
| 201441255        | invasive ductal carcinoma  | negative      | 0             | negative      | 0             | 3           | Primary              |
| 201441294        | invasive ductal carcinoma  | positive      | 90            | positive      | 70            | 1           | Primary              |
| 201441464        | solid papillary carcinoma  | positive      | 95            | positive      | 20            | 2           | Primary              |
| 201441602        | invasive ductal carcinoma  | positive      | 98            | positive      | 80            | 1           | Primary              |
| 201441604        | invasive ductal carcinoma  | positive      | 95            | None          | None          | 1           | Primary              |
| 201441606        | invasive mammary carcinoma | positive      | 99            | positive      | 5             | 1           | Primary              |
| 201441859        | invasive ductal carcinoma  | positive      | 98            | positive      | 90            | 0           | Primary              |
| 201441860        | mucinous carcinoma         | positive      | 95            | positive      | 98            | 0           | Primary              |
| 201442063        | invasive ductal carcinoma  | negative      | 0             | negative      | 0             | 3           | Primary              |
| 201442067        | invasive ductal carcinoma  | negative      | 0             | None          | None          | 3           | Primary              |
| 201442071        | invasive ductal carcinoma  | positive      | 90            | positive      | 10            | 0           | Primary              |
| 201442402        | invasive ductal carcinoma  | negative      | 0             | negative      | 0             | 2           | Primary              |
| 201442443        | invasive ductal carcinoma  | negative      | 0             | negative      | 0             | 1           | Primary              |
| 201442446        | invasive ductal carcinoma  | positive      | 65            | positive      | 60            | 3           | Primary              |
| 201442449        | invasive ductal carcinoma  | positive      | 55            | None          | None          | 3           | Primary              |

| Pathology_Number | Diagnosis                  | ER positivity | ER percentage | PR positivity | PR percentage | Her-2 score | Primary or Recurrent |
|------------------|----------------------------|---------------|---------------|---------------|---------------|-------------|----------------------|
| 201442521        | invasive ductal carcinoma  | positive      | 85            | positive      | 20            | 2           | Primary              |
| 201442800        | invasive ductal carcinoma  | positive      | 99            | positive      | 12            | 1           | Primary              |
| 201442801        | invasive ductal carcinoma  | negative      | 0             | negative      | 0             | 3           | Primary              |
| 201442802        | invasive ductal carcinoma  | negative      | 0             | None          | None          | 3           | Primary              |
| 201442804        | invasive ductal carcinoma  | positive      | 99            | positive      | 98            | 1           | Primary              |
| 201442819        | invasive ductal carcinoma  | positive      | 90            | positive      | 95            | 1           | Primary              |
| 201443054        | invasive ductal carcinoma  | negative      | 0             | negative      | 0             | 3           | Primary              |
| 201443179        | invasive ductal carcinoma  | negative      | 0             | negative      | 0             | 2           | Primary              |
| 201443180        | invasive ductal carcinoma  | positive      | 98            | positive      | 98            | 2           | Primary              |
| 201443199        | invasive ductal carcinoma  | negative      | 0             | negative      | 0             | 1           | Primary              |
| 201443364        | invasive ductal carcinoma  | negative      | 0             | negative      | 0             | 3           | Primary              |
| 201443368        | invasive ductal carcinoma  | positive      | 98            | positive      | 95            | 0           | Primary              |
| 201443542        | invasive ductal carcinoma  | positive      | 95            | positive      | 95            | 0           | Primary              |
| 201443543        | invasive ductal carcinoma  | negative      | 0             | negative      | 0             | 3           | Primary              |
| 201443711        | invasive ductal carcinoma  | positive      | 98            | positive      | 90            | 1           | Primary              |
| 201443775        | invasive ductal carcinoma  | positive      | 98            | positive      | 60            | 1           | Primary              |
| 201443776        | tubular carcinoma          | positive      | 95            | positive      | 20            | 1           | Primary              |
| 201443924        | invasive mammary carcinoma | negative      | 0             | negative      | 0             | 0           | Primary              |
| 201443925        | invasive ductal carcinoma  | negative      | 0             | negative      | 0             | 3           | Primary              |
| 201443926        | invasive ductal carcinoma  | positive      | 98            | positive      | 98            | 1           | Primary              |
| 201443927        | invasive ductal carcinoma  | positive      | 95            | positive      | 3             | 3           | Primary              |
| 201443930        | invasive ductal carcinoma  | positive      | 95            | negative      | 0             | 2           | Primary              |
| 201443932        | invasive ductal carcinoma  | positive      | 99            | positive      | 60            | 2           | Primary              |
| 201443934        | invasive ductal carcinoma  | negative      | 0             | negative      | 0             | 2           | Primary              |
| 201444288        | invasive ductal carcinoma  | positive      | 85            | positive      | 98            | 1           | Primary              |
| 201444289        | invasive ductal carcinoma  | positive      | 95            | positive      | 60            | 1           | Primary              |
| 201444291        | invasive ductal carcinoma  | negative      | 0             | negative      | 0             | 3           | Primary              |
| 201444296        | invasive ductal carcinoma  | positive      | 98            | positive      | 98            | 1           | Primary              |
| 201444306        | invasive ductal carcinoma  | negative      | 0             | negative      | 0             | 3           | Primary              |
| 201444308        | invasive ductal carcinoma  | positive      | 95            | positive      | 95            | 1           | Primary              |
| 201444376        | invasive ductal carcinoma  | positive      | 95            | positive      | 60            | 2           | Primary              |
| 201444377        | invasive ductal carcinoma  | negative      | 0             | negative      | 0             | 3           | Primary              |
| 201444464        | invasive ductal carcinoma  | positive      | 99            | positive      | 95            | 2           | Primary              |
| 201444491        | invasive ductal carcinoma  | negative      | 0             | negative      | 0             | 2           | Primary              |
| 201444661        | invasive ductal carcinoma  | negative      | 0             | negative      | 0             | 3           | Primary              |
| 201444749        | invasive ductal carcinoma  | positive      | 99            | positive      | 55            | 1           | Primary              |
| 201444876        | invasive ductal carcinoma  | negative      | 0             | negative      | 0             | 1           | Primary              |
| 201444877        | invasive ductal carcinoma  | positive      | 98            | positive      | 85            | 2           | Primary              |

| Pathology_Number | Diagnosis                  | ER positivity | ER percentage | PR positivity | PR percentage | Her-2 score | Primary or Recurrent |
|------------------|----------------------------|---------------|---------------|---------------|---------------|-------------|----------------------|
| 201444880        | invasive ductal carcinoma  | positive      | 98            | positive      | 60            | 2           | Primary              |
| 201444961        | invasive ductal carcinoma  | positive      | 98            | positive      | 60            | 0           | Primary              |
| 201445049        | invasive ductal carcinoma  | positive      | 90            | negative      | 0             | 1           | Primary              |
| 201445080        | invasive ductal carcinoma  | negative      | 0             | negative      | 0             | 3           | Primary              |
| 201445170        | mucinous carcinoma         | positive      | 95            | negative      | 0             | 2           | Primary              |
| 201445266        | invasive ductal carcinoma  | positive      | 70            | positive      | 55            | 3           | Primary              |
| 201445268        | invasive ductal carcinoma  | positive      | 95            | positive      | 40            | 3           | Primary              |
| 201445269        | invasive ductal carcinoma  | positive      | 40            | positive      | 90            | 1           | Primary              |
| 201445279        | invasive ductal carcinoma  | positive      | 90            | positive      | 10            | 2           | Primary              |
| 201445336        | invasive ductal carcinoma  | negative      | 0             | negative      | 0             | 3           | Primary              |
| 201445337        | invasive ductal carcinoma  | positive      | 20            | positive      | 5             | 3           | Primary              |
| 201445338        | mucinous carcinoma         | positive      | 95            | negative      | 0             | 1           | Primary              |
| 201445423        | invasive ductal carcinoma  | positive      | 90            | positive      | 5             | 2           | Primary              |
| 201445424        | invasive ductal carcinoma  | positive      | 20            | negative      | 0             | 1           | Primary              |
| 201445463        | invasive ductal carcinoma  | positive      | 95            | positive      | 98            | 0           | Primary              |
| 201445648        | invasive ductal carcinoma  | positive      | 90            | positive      | 85            | 1           | Primary              |
| 201446032        | invasive mammary carcinoma | negative      | 0             | negative      | 0             | 2           | Primary              |
| 201446033        | invasive ductal carcinoma  | positive      | 90            | positive      | 98            | 2           | Primary              |
| 201446042        | invasive ductal carcinoma  | positive      | 10            | negative      | 0             | 1           | Primary              |
| 201446145        | invasive ductal carcinoma  | positive      | 90            | positive      | 90            | 2           | Primary              |
| 201446146        | invasive ductal carcinoma  | positive      | 95            | positive      | 95            | 2           | Primary              |
| 201446147        | invasive lobular carcinoma | negative      | 0             | negative      | 0             | 2           | Primary              |
| 201446216        | invasive ductal carcinoma  | positive      | 65            | negative      | 0             | 1           | Primary              |
| 201446221        | invasive ductal carcinoma  | positive      | 60            | negative      | 0             | 2           | Primary              |
| 201446234        | invasive ductal carcinoma  | positive      | 98            | negative      | 0             | 3           | Primary              |
| 201446407        | invasive mammary carcinoma | positive      | 98            | positive      | 20            | 3           | Primary              |
| 201446446        | invasive ductal carcinoma  | negative      | 0             | negative      | 0             | 3           | Primary              |
| 201446828        | invasive ductal carcinoma  | negative      | 0             | negative      | 0             | 2           | Primary              |
| 201446829        | invasive lobular carcinoma | positive      | 95            | positive      | 80            | 2           | Primary              |
| 201447047        | invasive ductal carcinoma  | negative      | 0             | negative      | 0             | 3           | Primary              |
| 201447050        | invasive lobular carcinoma | positive      | 98            | negative      | 0             | 1           | Primary              |
| 201447051        | invasive ductal carcinoma  | negative      | 0             | negative      | 0             | 2           | Primary              |
| 201447124        | invasive ductal carcinoma  | positive      | 90            | positive      | 99            | 1           | Primary              |
| 201447371        | invasive ductal carcinoma  | positive      | 98            | positive      | 85            | 1           | Primary              |
| 201500038        | invasive ductal carcinoma  | positive      | 60            | positive      | 2             | 3           | Primary              |
| 201500039        | invasive ductal carcinoma  | positive      | 98            | positive      | 80            | 2           | Primary              |
| 201500078        | invasive ductal carcinoma  | positive      | 30            | positive      | 30            | 3           | Primary              |
| 201500079        | invasive ductal carcinoma  | positive      | 80            | positive      | 15            | 2           | Primary              |

| Pathology_Number | Diagnosis                         | ER positivity | ER percentage | PR positivity | PR percentage | Her-2 score | Primary or Recurrent |
|------------------|-----------------------------------|---------------|---------------|---------------|---------------|-------------|----------------------|
| 201500130        | invasive ductal carcinoma         | positive      |               | positive      |               | 3           | Primary              |
| 201500266        | invasive ductal carcinoma         | positive      | 80            | positive      | 95            | 1           | Primary              |
| 201500281        | invasive ductal carcinoma         | positive      | 90            | positive      | 85            | 1           | Primary              |
| 201500385        | invasive mammary carcinoma        | positive      | 2             | positive      | 10            | 2           | Primary              |
| 201500386        | invasive ductal carcinoma         | negative      | 0             | negative      | 0             | 2           | Primary              |
| 201500585        | invasive ductal carcinoma         | positive      | 95            | negative      | 0             | 1           | Primary              |
| 201500618        | invasive lobular carcinoma        | positive      | 98            | positive      | 85            | 2           | Primary              |
| 201500737        | invasive ductal carcinoma         | positive      | 40            | positive      | 30            | 2           | Primary              |
| 201500749        | invasive ductal carcinoma         | positive      | 2             | positive      | 2             | 3           | Primary              |
| 201500793        | invasive micropapillary carcinoma | positive      | 90            | positive      | 55            | 2           | Primary              |
| 201500794        | invasive ductal carcinoma         | positive      | 55            | negative      | 0             | 3           | Primary              |
| 201500903        | invasive ductal carcinoma         | positive      | 60            | positive      | 98            | 2           | Primary              |
| 201500949        | invasive ductal carcinoma         | positive      | 70            | positive      | 90            | 2           | Primary              |
| 201501126        | invasive ductal carcinoma         | positive      | 98            | positive      | 90            | 2           | Primary              |
| 201501206        | invasive ductal carcinoma         | positive      | 90            | positive      | 95            | 2           | Primary              |
| 201501474        | invasive mammary carcinoma        | positive      | 5             | negative      | 0             | 1           | Primary              |
| 201501475        | invasive ductal carcinoma         | positive      | 98            | negative      | 0             | 3           | Primary              |
| 201501499        | invasive ductal carcinoma         | positive      | 90            | positive      | 10            | 2           | Primary              |
| 201501651        | invasive ductal carcinoma         | negative      | 0             | negative      | 0             | 2           | Primary              |
| 201502127        | invasive ductal carcinoma         | negative      | 0             | negative      | 0             | 0           | Primary              |
| 201502418        | invasive ductal carcinoma         | negative      | 0             | negative      | 0             | 2           | Primary              |
| 201502419        | invasive ductal carcinoma         | negative      | 0             | negative      | 0             | 1           | Primary              |
| 201502518        | invasive ductal carcinoma         | positive      | 2             | negative      | 0             | 0           | Primary              |
| 201502519        | invasive ductal carcinoma         | positive      | 90            | positive      | 80            | 1           | Primary              |
| 201502613        | invasive ductal carcinoma         | positive      | 90            | negative      | 0             | 3           | Primary              |
| 201502614        | invasive ductal carcinoma         | negative      | 0             | negative      | 0             | 0           | Primary              |
| 201502619        | invasive ductal carcinoma         | positive      | 55            | positive      | 99            | 0           | Primary              |
| 201502622        | invasive ductal carcinoma         | negative      | 0             | negative      | 0             | 3           | Primary              |
| 201502701        | invasive ductal carcinoma         | positive      | 70            | positive      | 5             | 2           | Primary              |
| 201502755        | invasive ductal carcinoma         | positive      | 90            | positive      | 95            | 1           | Primary              |
| 201503030        | invasive ductal carcinoma         | positive      | 95            | positive      | 55            | 0           | Primary              |
| 201503270        | invasive ductal carcinoma         | positive      | 60            | positive      | 5             | 3           | Primary              |
| 201503271        | invasive ductal carcinoma         | positive      | 90            | positive      | 99            | 1           | Primary              |
| 201503536        | invasive ductal carcinoma         | None          | None          | None          | None          | None        | Primary              |
| 201504032        | invasive ductal carcinoma         | negative      | 0             | negative      | 0             | 0           | Primary              |
| 201504068        | invasive ductal carcinoma         | positive      | 95            | positive      | 99            | 1           | Primary              |
| 201504284        | invasive ductal carcinoma         | positive      | 80            | positive      | 99            | 1           | Primary              |

| Pathology_Number | Diagnosis                  | ER positivity | ER percentage | PR positivity | PR percentage | Her-2 score | Primary or Recurrent |
|------------------|----------------------------|---------------|---------------|---------------|---------------|-------------|----------------------|
| 201504285        | invasive ductal carcinoma  | negative      | 0             | negative      | 0             | 3           | Primary              |
| 201504466        | invasive ductal carcinoma  | negative      | 0             | negative      | 0             | 2           | Primary              |
| 201504467        | invasive ductal carcinoma  | positive      | 95            | positive      | 98            | 1           | Primary              |
| 201504469        | invasive lobular carcinoma | positive      | 95            | positive      | 100           | 1           | Primary              |
| 201504470        | invasive ductal carcinoma  | positive      | 98            | None          | None          | 1           | Primary              |
| 201504508        | mucinous carcinoma         | positive      | 99            | positive      | 96            | 0           | Primary              |
| 201504632        | invasive ductal carcinoma  | negative      | 0             | negative      | 0             | 0           | Primary              |
| 201504809        | invasive ductal carcinoma  | negative      | 0             | negative      | 0             | 3           | Primary              |
| 201504814        | invasive ductal carcinoma  | negative      | 0             | negative      | 0             | 3           | Primary              |
| 201504913        | invasive ductal carcinoma  | positive      | 70            | positive      | 10            | 3           | Recurrent            |
| 201504915        | invasive ductal carcinoma  | positive      | 95            | positive      | 3             | 0           | Primary              |
| 201504997        | invasive ductal carcinoma  | positive      | 90            | positive      | 99            | 0           | Primary              |
| 201505081        | invasive ductal carcinoma  | positive      | 50            | positive      | 90            | 2           | Primary              |
| 201505132        | invasive ductal carcinoma  | negative      | 0             | negative      | 0             | 3           | Primary              |
| 201505226        | invasive ductal carcinoma  | positive      | 70            | positive      | 20            | 1           | Primary              |
| 201505229        | invasive ductal carcinoma  | positive      | 45            | positive      | 3             | 0           | Primary              |
| 201505231        | invasive ductal carcinoma  | negative      | 0             | negative      | 0             | 0           | Primary              |
| 201505290        | invasive ductal carcinoma  | positive      | 85            | positive      | 95            | 0           | Primary              |
| 201505466        | invasive ductal carcinoma  | positive      | 40            | None          | None          | 0           | Primary              |
| 201505489        | invasive ductal carcinoma  | positive      | 95            | negative      | 0             | 0           | Primary              |
| 201505490        | invasive ductal carcinoma  | negative      | 0             | negative      | 0             | 0           | Primary              |
| 201505539        | invasive ductal carcinoma  | positive      | 98            | positive      | 98            | 1           | Primary              |
| 201505812        | invasive ductal carcinoma  | None          | None          | None          | None          | None        | Primary              |
| 201505894        | invasive ductal carcinoma  | negative      | 0             | negative      | 0             | 0           | Primary              |
| 201506068        | invasive ductal carcinoma  | positive      | 80            | negative      | 0             | 3           | Primary              |
| 201506328        | invasive lobular carcinoma | positive      | 80            | positive      | 30            | 1           | Primary              |
| 201506330        | invasive lobular carcinoma | positive      | 95            | positive      | 90            | 2           | Primary              |
| 201506673        | invasive ductal carcinoma  | positive      | 80            | positive      | 95            | 0           | Primary              |
| 201506748        | invasive ductal carcinoma  | positive      | 80            | positive      | 40            | 2           | Primary              |
| 201506749        | invasive ductal carcinoma  | positive      | 98            | positive      | 98            | 1           | Primary              |
| 201506901        | invasive ductal carcinoma  | negative      | 0             | negative      | 0             | 0           | Primary              |
| 201506903        | invasive ductal carcinoma  | positive      |               | negative      | 0             | 2           | Primary              |
| 201506938        | invasive ductal carcinoma  | positive      | 90            | positive      | 95            | 1           | Primary              |
| 201506981        | invasive ductal carcinoma  | negative      | 0             | negative      | 0             | 3           | Primary              |
| 201507129        | invasive ductal carcinoma  | positive      | 80            | positive      | 95            | 1           | Primary              |
| 201507180        | invasive ductal carcinoma  | positive      | 70            | negative      | 0             | 0           | Primary              |
| 201507373        | solid papillary carcinoma  | positive      | 60            | positive      | 99            | 0           | Primary              |
| 201507375        | invasive ductal carcinoma  | negative      | 0             | negative      | 0             | 0           | Primary              |

| Pathology_Number | Diagnosis                  | ER positivity | ER percentage | PR positivity | PR percentage | Her-2 score | Primary or Recurrent |
|------------------|----------------------------|---------------|---------------|---------------|---------------|-------------|----------------------|
| 201507766        | mucinous carcinoma         | None          | None          | None          | None          | None        | Primary              |
| 201507767        | invasive ductal carcinoma  | positive      | 65            | positive      | 40            | 2           | Primary              |
| 201507914        | invasive ductal carcinoma  | positive      | 40            | positive      | 95            | 2           | Primary              |
| 201508122        | invasive ductal carcinoma  | positive      | 70            | positive      | 45            | 2           | Primary              |
| 201508126        | invasive lobular carcinoma | positive      | 5             | positive      | 85            | 1           | Primary              |
| 201508180        | invasive ductal carcinoma  | positive      | 70            | positive      | 60            | 0           | Primary              |
| 201508188        | invasive lobular carcinoma | positive      | 90            | positive      | 90            | 1           | Primary              |
| 201508394        | invasive mammary carcinoma | positive      | 40            | positive      | 45            | 1           | Primary              |
| 201508591        | invasive ductal carcinoma  | positive      | 90            | positive      | 3             | 2           | Primary              |
| 201508594        | invasive ductal carcinoma  | positive      | 90            | positive      | 30            | 2           | Primary              |
| 201508637        | invasive lobular carcinoma | positive      | 80            | negative      | 0             | 0           | Primary              |
| 201508688        | invasive ductal carcinoma  | positive      | 65            | positive      | 70            | 2           | Primary              |
| 201508880        | invasive ductal carcinoma  | negative      | 0             | negative      | 0             | 2           | Primary              |
| 201508947        | invasive ductal carcinoma  | positive      | 98            | negative      | 0             | 2           | Primary              |
| 201508948        | invasive ductal carcinoma  | positive      | 98            | None          | None          | 1           | Primary              |
| 201509149        | invasive ductal carcinoma  | positive      | 90            | positive      | 80            | 2           | Primary              |
| 201509151        | invasive ductal carcinoma  | positive      | 55            | positive      | 10            | 2           | Primary              |
| 201509156        | invasive ductal carcinoma  | positive      | 95            | negative      | 0             | 2           | Primary              |
| 201509276        | invasive ductal carcinoma  | positive      | 80            | positive      | 30            | 0           | Primary              |
| 201509279        | invasive ductal carcinoma  | negative      | 0             | negative      | 0             | 3           | Primary              |
| 201509280        | invasive ductal carcinoma  | negative      | 0             | negative      | 0             | 3           | Primary              |
| 201509281        | invasive ductal carcinoma  | positive      | 95            | positive      | 95            | 0           | Primary              |
| 201509282        | invasive ductal carcinoma  | positive      | 95            | positive      | 99            | 0           | Primary              |
| 201509307        | invasive ductal carcinoma  | positive      | 65            | positive      | 70            | 0           | Primary              |
| 201509463        | invasive ductal carcinoma  | negative      | 0             | positive      | 3             | 2           | Primary              |
| 201509466        | invasive ductal carcinoma  | positive      | 70            | positive      | 99            | 1           | Primary              |
| 201509498        | mucinous carcinoma         | positive      | 98            | positive      | 100           | 0           | Primary              |
| 201509666        | invasive ductal carcinoma  | positive      | 80            | negative      | 0             | 3           | Primary              |
| 201509667        | invasive ductal carcinoma  | positive      | 95            | positive      | 99            | 0           | Primary              |
| 201509823        | invasive ductal carcinoma  | positive      | 95            | positive      | 100           | 0           | Primary              |
| 201509824        | invasive ductal carcinoma  | positive      | 98            | positive      | 70            | 1           | Primary              |
| 201509986        | invasive ductal carcinoma  | positive      | 98            | positive      | 80            | 1           | Primary              |
| 201510196        | invasive ductal carcinoma  | positive      | 5             | negative      | 0             | 2           | Primary              |
| 201510197        | mucinous carcinoma         | None          | None          | None          | None          | None        | Primary              |
| 201510198        | invasive ductal carcinoma  | positive      | 45            | positive      | 98            | 1           | Primary              |
| 201510199        | mucinous carcinoma         | positive      | 80            | positive      | 80            | 0           | Primary              |
| 201510272        | invasive lobular carcinoma | positive      | 25            | positive      | 30            | 0           | Primary              |
| 201510297        | invasive ductal carcinoma  | positive      | 95            | positive      | 20            | 0           | Primary              |

| Pathology_Number | Diagnosis                  | ER positivity | ER percentage | PR positivity | PR percentage | Her-2 score | Primary or Recurrent |
|------------------|----------------------------|---------------|---------------|---------------|---------------|-------------|----------------------|
| 201510299        | invasive ductal carcinoma  | positive      | 90            | positive      | 70            | 0           | Primary              |
| 201510471        | invasive ductal carcinoma  | negative      | 0             | negative      | 0             | 3           | Primary              |
| 201510473        | invasive lobular carcinoma | positive      | 85            | positive      | 95            | 1           | Primary              |
| 201510475        | invasive ductal carcinoma  | positive      | 98            | positive      | 55            | 1           | Primary              |
| 201510546        | invasive ductal carcinoma  | positive      | 90            | positive      | 99            | 1           | Primary              |
| 201510685        | invasive ductal carcinoma  | positive      | 95            | negative      | 0             | 3           | Primary              |
| 201510686        | invasive ductal carcinoma  | positive      | 80            | positive      | 85            | 3           | Recurrent            |
| 201510746        | invasive ductal carcinoma  | positive      | 95            | negative      | 0             | 0           | Primary              |
| 201510747        | invasive ductal carcinoma  | negative      | 0             | negative      | 0             | 1           | Primary              |
| 201510837        | invasive ductal carcinoma  | positive      | 85            | positive      | 20            | 3           | Primary              |
| 201511007        | invasive ductal carcinoma  | positive      | 90            | positive      | 99            | 1           | Primary              |
| 201511008        | invasive lobular carcinoma | positive      | 80            | positive      | 3             | 2           | Primary              |
| 201511009        | invasive ductal carcinoma  | positive      | 60            | negative      | 0             | 1           | Primary              |
| 201511035        | invasive ductal carcinoma  | positive      | 90            | positive      | 90            | 0           | Primary              |
| 201511151        | invasive ductal carcinoma  | positive      | 90            | positive      | 65            | 1           | Primary              |
| 201511152        | invasive ductal carcinoma  | positive      | 95            | positive      | 5             | 3           | Primary              |
| 201511258        | invasive ductal carcinoma  | positive      | 65            | positive      | 98            | 2           | Primary              |
| 201511259        | invasive ductal carcinoma  | positive      | 99            | positive      | 98            | 1           | Primary              |
| 201511323        | invasive ductal carcinoma  | positive      | 60            | positive      | 5             | 2           | Primary              |
| 201511324        | mucinous carcinoma         | positive      | 85            | positive      | 95            | 0           | Primary              |
| 201511471        | invasive ductal carcinoma  | positive      | 90            | positive      | 90            | 0           | Primary              |
| 201511472        | invasive ductal carcinoma  | negative      | 0             | negative      | 0             | 2           | Primary              |
| 201511475        | invasive ductal carcinoma  | positive      | 90            | positive      | 15            | 2           | Primary              |
| 201511478        | invasive ductal carcinoma  | positive      | 20            | negative      | 0             | 3           | Primary              |
| 201511674        | invasive ductal carcinoma  | positive      | 70            | negative      | 0             | 2           | Primary              |
| 201511677        | invasive ductal carcinoma  | positive      | 98            | positive      | 98            | 0           | Primary              |
| 201511705        | invasive ductal carcinoma  | positive      | 98            | positive      | 75            | 1           | Primary              |
| 201511706        | invasive ductal carcinoma  | negative      | 0             | negative      | 0             | 3           | Primary              |
| 201511763        | invasive ductal carcinoma  | positive      | 95            | negative      | 0             | 1           | Primary              |
| 201511877        | invasive ductal carcinoma  | positive      | 95            | positive      | 35            | 2           | Primary              |
| 201511880        | invasive ductal carcinoma  | positive      | 70            | positive      | 80            | 0           | Primary              |
| 201512064        | invasive ductal carcinoma  | positive      | 95            | positive      | 100           | 1           | Primary              |
| 201512091        | invasive lobular carcinoma | negative      | 0             | negative      | 0             | 0           | Primary              |
| 201512158        | invasive ductal carcinoma  | negative      | 0             | negative      | 0             | 0           | Primary              |
| 201512342        | invasive ductal carcinoma  | positive      | 15            | negative      | 0             | 3           | Primary              |
| 201512343        | invasive ductal carcinoma  | positive      | 95            | positive      | 98            | 1           | Primary              |
| 201512345        | invasive ductal carcinoma  | positive      | 99            | positive      | 99            | 2           | Primary              |
| 201512346        | invasive ductal carcinoma  | positive      | 5             | negative      | 0             | 2           | Primary              |



| Pathology_Number | Diagnosis                        | ER positivity | ER percentage | PR positivity | PR percentage | Her-2 score | Primary or Recurrent |
|------------------|----------------------------------|---------------|---------------|---------------|---------------|-------------|----------------------|
| 201512358        | invasive ductal carcinoma        | negative      | 0             | negative      | 0             | 0           | Primary              |
| 201512425        | invasive ductal carcinoma        | positive      | 70            | positive      | 70            | 0           | Primary              |
| 201512427        | invasive ductal carcinoma        | positive      | 95            | positive      | 40            | 0           | Primary              |
| 201512428        | mucinous carcinoma               | positive      | 99            | positive      | 99            | 0           | Primary              |
| 201512483        | invasive ductal carcinoma        | positive      | 90            | positive      | 99            | 2           | Primary              |
| 201512832        | invasive mammary carcinoma       | positive      | 95            | positive      | 99            | 0           | Primary              |
| 201512833        | invasive ductal carcinoma        | positive      | 98            | positive      | 99            | 1           | Primary              |
| 201512996        | invasive ductal carcinoma        | positive      | 70            | positive      | 95            | 0           | Primary              |
| 201513019        | solid papillary carcinoma        | positive      | 98            | positive      | 98            | 0           | Primary              |
| 201513236        | invasive ductal carcinoma        | positive      | 80            | positive      | 80            | 1           | Primary              |
| 201513239        | invasive ductal carcinoma        | negative      | 0             | negative      | 0             | 3           | Primary              |
| 201513273        | invasive lobular carcinoma       | positive      | -1            | positive      | -1            | 2           | Primary              |
| 201513274        | invasive ductal carcinoma        | positive      | 70            | positive      | 90            | 0           | Primary              |
| 201513737        | invasive ductal carcinoma        | positive      | 65            | positive      | 35            | 0           | Primary              |
| 201513739        | invasive ductal carcinoma        | negative      | 0             | negative      | 0             | 0           | Primary              |
| 201513741        | invasive ductal carcinoma        | positive      | 90            | positive      | 30            | 0           | Primary              |
| 201513744        | invasive ductal carcinoma        | positive      | 30            | positive      | 30            | 0           | Primary              |
| 201513785        | invasive ductal carcinoma        | positive      | 85            | positive      | 95            | 0           | Primary              |
| 201513823        | invasive ductal carcinoma        | positive      | 70            | positive      | 55            | 0           | Primary              |
| 201513824        | invasive ductal carcinoma        | positive      | 98            | positive      | 35            | 0           | Primary              |
| 201513929        | invasive ductal carcinoma        | positive      | 90            | positive      | 99            | 2           | Primary              |
| 201514116        | encapsulated papillary carcinoma | positive      | 65            | positive      | 70            | None        | Primary              |
| 201514118        | invasive ductal carcinoma        | negative      | 0             | negative      | 0             | 1           | Primary              |
| 201514119        | invasive ductal carcinoma        | negative      | 0             | negative      | 0             | 3           | Primary              |
| 201514153        | invasive ductal carcinoma        | negative      | 0             | negative      | 0             | 0           | Primary              |
| 201514154        | invasive ductal carcinoma        | positive      | 95            | positive      | 70            | 1           | Primary              |
| 201514198        | invasive ductal carcinoma        | positive      | 95            | positive      | 5             | 1           | Primary              |
| 201514332        | invasive mammary carcinoma       | positive      | 99            | negative      | 0             | 1           | Primary              |
| 201514337        | invasive ductal carcinoma        | positive      | 55            | positive      | 2             | 0           | Primary              |
| 201514338        | invasive ductal carcinoma        | negative      | 0             | negative      | 0             | 3           | Primary              |
| 201514827        | invasive ductal carcinoma        | positive      | 90            | positive      | 8             | 1           | Primary              |
| 201514828        | invasive ductal carcinoma        | positive      | 98            | positive      | 70            | 1           | Primary              |
| 201514829        | invasive ductal carcinoma        | negative      | 0             | negative      | 0             | 3           | Primary              |
| 201514924        | invasive ductal carcinoma        | positive      | 98            | positive      | 45            | 1           | Primary              |
| 201514925        | invasive ductal carcinoma        | positive      | 98            | negative      | 0             | 1           | Primary              |
| 201514926        | invasive ductal carcinoma        | positive      | 98            | positive      | 70            | 0           | Primary              |
| 201515067        | invasive ductal carcinoma        | positive      | 85            | positive      | 100           | 1           | Primary              |

| Pathology_Number | Diagnosis                  | ER positivity | ER percentage | PR positivity | PR percentage | Her-2 score | Primary or Recurrent |
|------------------|----------------------------|---------------|---------------|---------------|---------------|-------------|----------------------|
| 201515077        | invasive lobular carcinoma | positive      | 90            | positive      | 98            | 1           | Primary              |
| 201515078        | invasive ductal carcinoma  | positive      | 80            | positive      | 99            | 1           | Primary              |
| 201515079        | invasive ductal carcinoma  | positive      | 85            | None          | None          | 1           | Primary              |
| 201515227        | invasive ductal carcinoma  | negative      | 0             | negative      | 0             | 1           | Primary              |
| 201515267        | invasive lobular carcinoma | positive      | 80            | positive      | 95            | 2           | Primary              |
| 201515429        | invasive ductal carcinoma  | positive      | 95            | positive      | 20            | 1           | Primary              |
| 201515442        | invasive ductal carcinoma  | positive      | 80            | positive      | 60            | 0           | Primary              |
| 201515443        | invasive ductal carcinoma  | negative      | 0             | negative      | 0             | 2           | Primary              |
| 201515444        | invasive ductal carcinoma  | positive      | 95            | positive      | 20            | 1           | Primary              |
| 201515452        | invasive ductal carcinoma  | positive      | 90            | positive      | 65            | 1           | Primary              |
| 201515669        | invasive ductal carcinoma  | positive      | 90            | positive      | 90            | 0           | Primary              |
| 201515671        | invasive ductal carcinoma  | positive      | 70            | positive      | 55            | 3           | Primary              |
| 201515913        | invasive mammary carcinoma | positive      | 98            | positive      | 65            | 1           | Primary              |
| 201515914        | invasive ductal carcinoma  | positive      | 90            | positive      | 98            | 1           | Primary              |
| 201515916        | invasive ductal carcinoma  | negative      | 0             | negative      | 0             | 3           | Primary              |
| 201515926        | invasive lobular carcinoma | positive      | -1            | positive      | -1            | 2           | Primary              |
| 201516025        | invasive ductal carcinoma  | positive      | 99            | positive      | 85            | 1           | Primary              |
| 201516113        | mucinous carcinoma         | positive      | 99            | positive      | 85            | 1           | Primary              |
| 201516284        | invasive ductal carcinoma  | negative      | 0             | negative      | 0             | 3           | Primary              |
| 201516286        | invasive ductal carcinoma  | negative      | 0             | negative      | 0             | 0           | Primary              |
| 201516289        | invasive ductal carcinoma  | positive      | 90            | positive      | 60            | 2           | Primary              |
| 201516376        | invasive ductal carcinoma  | positive      | 98            | positive      | 100           | 0           | Primary              |
| 201516630        | invasive ductal carcinoma  | negative      | 0             | negative      | 0             | 3           | Primary              |
| 201516631        | invasive mammary carcinoma | negative      | 0             | negative      | 0             | 2           | Primary              |
| 201516707        | invasive ductal carcinoma  | negative      | 0             | negative      | 0             | 1           | Primary              |
| 201516806        | invasive ductal carcinoma  | positive      | 80            | positive      | 80            | 1           | Primary              |
| 201516818        | invasive ductal carcinoma  | positive      | 99            | positive      | 70            | 0           | Primary              |
| 201516910        | invasive ductal carcinoma  | positive      | 30            | negative      | 0             | 2           | Primary              |
| 201516911        | invasive ductal carcinoma  | positive      | 99            | positive      | 20            | 2           | Primary              |
| 201516912        | invasive ductal carcinoma  | positive      | 99            | positive      | 70            | 2           | Primary              |
| 201517020        | invasive ductal carcinoma  | negative      | 0             | negative      | 0             | 2           | Primary              |
| 201517179        | mucinous carcinoma         | positive      | 99            | None          | None          | 0           | Primary              |
| 201517180        | invasive ductal carcinoma  | positive      | 100           | positive      | 30            | 2           | Primary              |
| 201517181        | mucinous carcinoma         | positive      | 99            | positive      | 99            | 0           | Primary              |
| 201517207        | invasive ductal carcinoma  | positive      | 90            | negative      | 0             | 2           | Primary              |
| 201517291        | invasive ductal carcinoma  | positive      | 70            | positive      | 60            | 0           | Primary              |
| 201517444        | invasive lobular carcinoma | positive      | 99            | positive      | 98            | 1           | Primary              |
| 201517445        | invasive ductal carcinoma  | positive      | 98            | positive      | 99            | 1           | Primary              |

| Pathology_Number | Diagnosis                        | ER positivity | ER percentage | PR positivity | PR percentage | Her-2 score | Primary or Recurrent |
|------------------|----------------------------------|---------------|---------------|---------------|---------------|-------------|----------------------|
| 201517515        | invasive ductal carcinoma        | positive      | 95            | positive      | 95            | 1           | Primary              |
| 201517715        | invasive lobular carcinoma       | positive      | 98            | negative      | 0             | 0           | Primary              |
| 201517796        | invasive ductal carcinoma        | positive      | 90            | positive      | 100           | 1           | Primary              |
| 201517962        | invasive ductal carcinoma        | positive      | 98            | positive      | 60            | 0           | Primary              |
| 201518015        | invasive ductal carcinoma        | positive      | 98            | positive      | 95            | 0           | Primary              |
| 201518107        | invasive ductal carcinoma        | positive      | 95            | positive      | 98            | 3           | Primary              |
| 201518108        | invasive ductal carcinoma        | positive      | 98            | positive      | 10            | 2           | Primary              |
| 201518113        | invasive ductal carcinoma        | positive      | 90            | negative      | 0             | 2           | Primary              |
| 201518272        | invasive ductal carcinoma        | positive      | 3             | negative      | 0             | 2           | Primary              |
| 201518274        | invasive ductal carcinoma        | positive      | 90            | negative      | 0             | 1           | Primary              |
| 201518275        | invasive ductal carcinoma        | positive      | 99            | negative      | 0             | 1           | Primary              |
| 201518290        | invasive ductal carcinoma        | positive      | 80            | positive      | 20            | 0           | Primary              |
| 201518385        | invasive ductal carcinoma        | positive      | 90            | positive      | 100           | 0           | Primary              |
| 201518533        | invasive ductal carcinoma        | positive      | 100           | positive      | 100           | 1           | Primary              |
| 201518537        | invasive ductal carcinoma        | negative      | 0             | negative      | 0             | 3           | Primary              |
| 201518540        | invasive lobular carcinoma       | positive      | 98            | positive      | 98            | 2           | Primary              |
| 201518574        | invasive ductal carcinoma        | negative      | 0             | negative      | 0             | 0           | Primary              |
| 201518786        | invasive ductal carcinoma        | negative      | 0             | negative      | 0             | 2           | Primary              |
| 201518791        | invasive ductal carcinoma        | positive      | 90            | positive      | 85            | 3           | Primary              |
| 201518801        | invasive ductal carcinoma        | negative      | 0             | negative      | 0             | 2           | Primary              |
| 201518961        | invasive ductal carcinoma        | negative      | 0             | negative      | 0             | 2           | Primary              |
| 201518966        | invasive ductal carcinoma        | positive      | 95            | positive      | 90            | 1           | Primary              |
| 201518991        | invasive ductal carcinoma        | positive      | 90            | positive      | 98            | 0           | Primary              |
| 201519075        | invasive ductal carcinoma        | positive      | 80            | positive      | 40            | 0           | Primary              |
| 201519196        | invasive ductal carcinoma        | positive      | 99            | positive      | 100           | 1           | Primary              |
| 201519388        | invasive lobular carcinoma       | positive      | 90            | positive      | 60            | 1           | Primary              |
| 201519389        | encapsulated papillary carcinoma | positive      | 100           | positive      | 45            | None        | Primary              |
| 201519448        | mucinous carcinoma               | positive      | 100           | positive      | 90            | 2           | Primary              |
| 201519823        | invasive ductal carcinoma        | negative      | 0             | negative      | 0             | 2           | Primary              |
| 201519825        | invasive ductal carcinoma        | negative      | 0             | negative      | 0             | 2           | Primary              |
| 201519902        | invasive ductal carcinoma        | positive      | 99            | positive      | 85            | 2           | Primary              |
| 201520020        | invasive ductal carcinoma        | positive      | 99            | positive      | 30            | 2           | Primary              |
| 201520097        | invasive ductal carcinoma        | positive      | 99            | positive      | 10            | 2           | Primary              |
| 201520101        | invasive ductal carcinoma        | negative      | 0             | negative      | 0             | 3           | Primary              |
| 201520102        | invasive ductal carcinoma        | positive      | 30            | positive      | 10            | 3           | Primary              |
| 201520248        | invasive lobular carcinoma       | positive      | 95            | positive      | 95            | 1           | Primary              |
| 201520250        | invasive ductal carcinoma        | positive      | 98            | positive      | 90            | 2           | Primary              |

| Pathology_Number | Diagnosis                  | ER positivity | ER percentage | PR positivity | PR percentage | Her-2 score | Primary or Recurrent |
|------------------|----------------------------|---------------|---------------|---------------|---------------|-------------|----------------------|
| 201520394        | invasive mammary carcinoma | positive      | 95            | positive      | 95            | 1           | Primary              |
| 201520435        | invasive ductal carcinoma  | positive      | 98            | positive      | 99            | 0           | Primary              |
| 201520480        | invasive ductal carcinoma  | positive      | 90            | positive      | 95            | 0           | Primary              |
| 201520481        | invasive ductal carcinoma  | negative      | 0             | negative      | 0             | 2           | Primary              |
| 201520652        | invasive ductal carcinoma  | negative      | 0             | negative      | 0             | 1           | Primary              |
| 201520904        | invasive ductal carcinoma  | negative      | 0             | negative      | 0             | 3           | Primary              |
| 201520989        | invasive ductal carcinoma  | positive      | 90            | positive      | 95            | 3           | Primary              |
| 201520990        | invasive ductal carcinoma  | negative      | 0             | negative      | 0             | 0           | Primary              |
| 201520991        | invasive ductal carcinoma  | positive      | 70            | negative      | 0             | 1           | Primary              |
| 201521079        | invasive ductal carcinoma  | positive      | 90            | positive      | 95            | 2           | Primary              |
| 201521437        | invasive ductal carcinoma  | negative      | 0             | negative      | 0             | 3           | Primary              |
| 201521440        | invasive ductal carcinoma  | negative      | 0             | negative      | 0             | 2           | Primary              |
| 201521441        | invasive ductal carcinoma  | negative      | 0             | negative      | 0             | 2           | Primary              |
| 201521468        | invasive ductal carcinoma  | positive      | 90            | positive      | 20            | 2           | Primary              |
| 201521518        | invasive ductal carcinoma  | positive      | 90            | positive      | 98            | 1           | Primary              |
| 201521520        | invasive lobular carcinoma | positive      | 98            | positive      | 98            | 1           | Primary              |
| 201521661        | invasive ductal carcinoma  | positive      | 80            | positive      | 5             | 1           | Primary              |
| 201521662        | invasive ductal carcinoma  | positive      | 90            | positive      | 70            | 0           | Primary              |
| 201521667        | invasive ductal carcinoma  | positive      | 98            | positive      | 65            | 1           | Primary              |
| 201521705        | invasive lobular carcinoma | positive      | 90            | positive      | 90            | 1           | Primary              |
| 201521707        | invasive ductal carcinoma  | positive      | 98            | positive      | 100           | 0           | Primary              |
| 201521710        | invasive ductal carcinoma  | positive      | 100           | positive      | 100           | 0           | Primary              |
| 201521921        | invasive ductal carcinoma  | positive      | 90            | positive      | 55            | 0           | Primary              |
| 201521928        | invasive ductal carcinoma  | negative      | 0             | negative      | 0             | 1           | Primary              |
| 201521929        | invasive mammary carcinoma | positive      | 85            | positive      | 85            | 1           | Primary              |
| 201521931        | invasive ductal carcinoma  | positive      | 65            | positive      | 15            | 2           | Primary              |
| 201522010        | invasive ductal carcinoma  | positive      | 80            | positive      | 95            | 0           | Primary              |
| 201522011        | invasive ductal carcinoma  | negative      | 0             | negative      | 0             | 2           | Primary              |
| 201522099        | invasive ductal carcinoma  | positive      | 45            | negative      | 0             | 1           | Primary              |
| 201522100        | invasive ductal carcinoma  | positive      | 98            | positive      | 98            | 1           | Primary              |
| 201522102        | invasive ductal carcinoma  | positive      | 20            | negative      | 0             | 3           | Primary              |
| 201522103        | invasive ductal carcinoma  | positive      | 90            | None          | None          | 1           | Primary              |
| 201522139        | invasive ductal carcinoma  | positive      | 90            | positive      | 10            | 2           | Primary              |
| 201522314        | invasive ductal carcinoma  | negative      | 0             | negative      | 0             | 0           | Primary              |
| 201522315        | invasive ductal carcinoma  | positive      | 15            | positive      | 15            | 3           | Primary              |
| 201522318        | invasive ductal carcinoma  | negative      | 0             | negative      | 0             | 3           | Primary              |
| 201522320        | invasive ductal carcinoma  | positive      | 98            | positive      | 35            | 2           | Primary              |
| 201522701        | invasive ductal carcinoma  | positive      | 90            | negative      | 0             | 1           | Primary              |

| Pathology_Number | Diagnosis                        | ER positivity | ER percentage | PR positivity | PR percentage | Her-2 score | Primary or Recurrent |
|------------------|----------------------------------|---------------|---------------|---------------|---------------|-------------|----------------------|
| 201522703        | invasive ductal carcinoma        | positive      | 98            | positive      | 98            | 0           | Primary              |
| 201522706        | invasive mammary carcinoma       | positive      | 98            | negative      | 0             | 2           | Primary              |
| 201522708        | invasive ductal carcinoma        | positive      | 98            | negative      | 0             | 2           | Primary              |
| 201522848        | invasive ductal carcinoma        | positive      | 83            | positive      | 98            | 0           | Primary              |
| 201523018        | invasive ductal carcinoma        | positive      | 20            | negative      | 0             | 3           | Primary              |
| 201523035        | invasive ductal carcinoma        | negative      | 0             | negative      | 0             | 2           | Primary              |
| 201523093        | invasive ductal carcinoma        | None          | None          | None          | None          | None        | Primary              |
| 201523254        | invasive ductal carcinoma        | positive      | 90            | positive      | 65            | 0           | Primary              |
| 201523335        | invasive ductal carcinoma        | positive      | 98            | positive      | 20            | 2           | Primary              |
| 201523339        | invasive ductal carcinoma        | positive      | 95            | positive      | 70            | 1           | Primary              |
| 201523425        | invasive ductal carcinoma        | positive      | 98            | positive      | 35            | 2           | Primary              |
| 201523426        | invasive ductal carcinoma        | negative      | 0             | negative      | 0             | 3           | Primary              |
| 201523428        | invasive ductal carcinoma        | positive      | 30            | negative      | 0             | 3           | Primary              |
| 201523429        | invasive ductal carcinoma        | positive      | 98            | positive      | 95            | 1           | Primary              |
| 201523660        | invasive ductal carcinoma        | positive      | 80            | positive      | 98            | 0           | Primary              |
| 201523661        | encapsulated papillary carcinoma | positive      | 80            | positive      | 99            | None        | Primary              |
| 201523865        | invasive ductal carcinoma        | negative      | 0             | negative      | 0             | 3           | Recurrent            |
| 201523899        | invasive ductal carcinoma        | positive      | 98            | positive      | 98            | 2           | Primary              |
| 201523981        | invasive ductal carcinoma        | positive      | 65            | positive      | 98            | 1           | Primary              |
| 201524059        | invasive ductal carcinoma        | negative      | 0             | negative      | 0             | 1           | Primary              |
| 201524060        | solid papillary carcinoma        | positive      | 98            | positive      | 98            | None        | Primary              |
| 201524077        | invasive ductal carcinoma        | positive      | 98            | positive      | 98            | 0           | Primary              |
| 201524156        | invasive ductal carcinoma        | positive      | 70            | positive      | 40            | 1           | Primary              |
| 201524157        | invasive ductal carcinoma        | positive      | 98            | positive      | 98            | 1           | Primary              |
| 201524159        | invasive ductal carcinoma        | positive      | 98            | positive      | 5             | 2           | Primary              |
| 201524243        | invasive ductal carcinoma        | positive      | 99            | positive      | 70            | 2           | Primary              |
| 201524244        | invasive ductal carcinoma        | negative      | 0             | negative      | 0             | 0           | Primary              |
| 201524248        | invasive ductal carcinoma        | positive      | 70            | positive      | 70            | 2           | Primary              |
| 201524249        | invasive ductal carcinoma        | positive      | 80            | positive      | 3             | 2           | Primary              |
| 201524368        | mucinous carcinoma               | positive      | 98            | positive      | 98            | 0           | Primary              |
| 201524375        | invasive ductal carcinoma        | positive      | 98            | positive      | 99            | 0           | Primary              |
| 201524505        | invasive ductal carcinoma        | positive      | 95            | positive      | 80            | 1           | Primary              |
| 201524538        | invasive ductal carcinoma        | positive      | 80            | positive      | 95            | 1           | Primary              |
| 201524591        | invasive ductal carcinoma        | negative      | 0             | negative      | 0             | 0           | Primary              |
| 201524592        | invasive ductal carcinoma        | positive      | 60            | positive      | 90            | 0           | Primary              |
| 201524789        | invasive ductal carcinoma        | positive      | 45            | positive      | 90            | 3           | Primary              |
| 201524792        | invasive ductal carcinoma        | positive      | 85            | positive      | 98            | 2           | Primary              |

| Pathology_Number | Diagnosis                             | ER positivity | ER percentage | PR positivity | PR percentage | Her-2 score | Primary or Recurrent |
|------------------|---------------------------------------|---------------|---------------|---------------|---------------|-------------|----------------------|
| 201524794        | mucinous carcinoma                    | positive      | 98            | positive      | 85            | 0           | Primary              |
| 201524850        | invasive ductal carcinoma             | positive      | 95            | negative      | 0             | 1           | Primary              |
| 201525011        | invasive ductal carcinoma             | negative      | 0             | negative      | 0             | 3           | Primary              |
| 201525028        | invasive ductal carcinoma             | positive      | 98            | positive      | 98            | 0           | Primary              |
| 201525032        | mucinous carcinoma                    | positive      | 98            | positive      | 98            | 0           | Primary              |
| 201525073        | invasive ductal carcinoma             | positive      | 99            | positive      | 99            | 2           | Primary              |
| 201525231        | invasive ductal carcinoma             | positive      | 20            | positive      | 20            | 1           | Primary              |
| 201525232        | invasive ductal carcinoma             | negative      | 0             | negative      | 0             | 0           | Primary              |
| 201525237        | invasive ductal carcinoma             | negative      | 0             | negative      | 0             | 3           | Primary              |
| 201525241        | solid papillary carcinoma             | positive      | 90            | positive      | 95            | None        | Primary              |
| 201525242        | invasive ductal carcinoma             | negative      | 0             | negative      | 0             | 3           | Primary              |
| 201525260        | invasive ductal carcinoma             | positive      | 98            | positive      | 95            | 1           | Primary              |
| 201525296        | invasive ductal carcinoma             | positive      | 80            | positive      | 65            | 0           | Primary              |
| 201525298        | invasive ductal carcinoma             | positive      | 98            | positive      | 80            | 0           | Primary              |
| 201525299        | invasive ductal carcinoma             | positive      | 10            | negative      | 0             | 3           | Primary              |
| 201525397        | invasive ductal carcinoma             | positive      | 98            | positive      | 95            | 1           | Primary              |
| 201525607        | invasive lobular carcinoma            | positive      | 90            | positive      | 95            | 1           | Primary              |
| 201525608        | invasive ductal carcinoma             | negative      | 0             | negative      | 0             | 3           | Primary              |
| 201525809        | invasive ductal carcinoma             | negative      | 0             | negative      | 0             | 3           | Primary              |
| 201525811        | invasive ductal carcinoma             | positive      | 98            | positive      | 30            | 2           | Primary              |
| 201525812        | invasive ductal carcinoma             | negative      | 0             | negative      | 0             | 3           | Recurrent            |
| 201525815        | invasive lobular carcinoma            | positive      | 20            | negative      | 0             | 1           | Primary              |
| 201526144        | invasive ductal carcinoma             | positive      | 85            | positive      | 99            | 0           | Primary              |
| 201526145        | invasive ductal carcinoma             | negative      | 0             | negative      | 0             | 0           | Primary              |
| 201526287        | invasive carcinoma of no special type | positive      | 99            | positive      | 35            | 0           | Primary              |
| 201526344        | invasive ductal carcinoma             | positive      | 3             | negative      | 0             | 3           | Primary              |
| 201526347        | invasive ductal carcinoma             | negative      | 0             | negative      | 0             | 3           | Primary              |
| 201526472        | invasive ductal carcinoma             | positive      | 90            | positive      | 98            | 0           | Primary              |
| 201526582        | invasive ductal carcinoma             | None          | None          | None          | None          | None        | Primary              |
| 201526883        | invasive ductal carcinoma             | positive      | 99            | positive      | 85            | 0           | Primary              |
| 201526884        | invasive ductal carcinoma             | positive      | 10            | negative      | 0             | 3           | Primary              |
| 201526973        | invasive mammary carcinoma            | positive      | 90            | negative      | 0             | 1           | Primary              |
| 201527189        | invasive ductal carcinoma             | positive      | 20            | positive      | 90            | 3           | Primary              |
| 201527190        | invasive ductal carcinoma             | None          | None          | None          | None          | None        | Primary              |
| 201527280        | invasive ductal carcinoma             | negative      | 0             | negative      | 0             | 3           | Primary              |
| 201527281        | invasive ductal carcinoma             | negative      | 0             | negative      | 0             | 0           | Primary              |
| 201527284        | invasive ductal carcinoma             | negative      | 0             | negative      | 0             | 3           | Primary              |

| Pathology_Number | Diagnosis                        | ER positivity | ER percentage | PR positivity | PR percentage | Her-2 score | Primary or Recurrent |
|------------------|----------------------------------|---------------|---------------|---------------|---------------|-------------|----------------------|
| 201527287        | invasive ductal carcinoma        | positive      | 45            | positive      |               | 2           | Primary              |
| 201527290        | invasive ductal carcinoma        | positive      | 90            | positive      | 20            | 2           | Primary              |
| 201527360        | invasive ductal carcinoma        | positive      | 90            | positive      | 99            | 1           | Primary              |
| 201527361        | invasive ductal carcinoma        | positive      | 99            | positive      | 45            | 0           | Primary              |
| 201527362        | invasive ductal carcinoma        | positive      | 90            | negative      | 0             | 2           | Primary              |
| 201527505        | invasive ductal carcinoma        | negative      | 0             | negative      | 0             | 3           | Primary              |
| 201527679        | invasive ductal carcinoma        | positive      | 90            | positive      | 95            | 2           | Primary              |
| 201527680        | invasive mammary carcinoma       | negative      | 0             | negative      | 0             | 0           | Primary              |
| 201527682        | invasive ductal carcinoma        | negative      | 0             | negative      | 0             | 3           | Primary              |
| 201527685        | mucinous carcinoma               | negative      | 0             | negative      | 0             | 2           | Primary              |
| 201527728        | invasive ductal carcinoma        | negative      | 0             | negative      | 0             | 3           | Primary              |
| 201527775        | invasive ductal carcinoma        | negative      | 0             | negative      | 0             | 3           | Primary              |
| 201527777        | invasive ductal carcinoma        | positive      | 98            | positive      | 85            | 0           | Primary              |
| 201527778        | invasive ductal carcinoma        | positive      | 98            | positive      | 80            | 1           | Primary              |
| 201527781        | invasive ductal carcinoma        | positive      | 98            | positive      | 70            | 1           | Primary              |
| 201527905        | mucinous carcinoma               | positive      | 99            | positive      | 95            | 0           | Primary              |
| 201527907        | invasive ductal carcinoma        | negative      | 0             | negative      | 0             | 0           | Primary              |
| 201527942        | invasive ductal carcinoma        | positive      | 99            | positive      | 95            | 1           | Primary              |
| 201527958        | mucinous carcinoma               | positive      | 98            | positive      | 98            | 0           | Primary              |
| 201528264        | encapsulated papillary carcinoma | positive      | 99            | positive      | 95            | 1           | Primary              |
| 201528484        | invasive ductal carcinoma        | positive      | 100           | positive      | 95            | 1           | Primary              |
| 201528485        | invasive ductal carcinoma        | positive      | 45            | positive      | 20            | 0           | Primary              |
| 201528606        | invasive ductal carcinoma        | negative      | 0             | negative      | 0             | 0           | Primary              |
| 201528608        | invasive ductal carcinoma        | negative      | 0             | negative      | 0             | 3           | Primary              |
| 201528609        | invasive ductal carcinoma        | positive      | 98            | positive      | 99            | 1           | Primary              |
| 201528768        | invasive ductal carcinoma        | positive      | 99            | positive      | 85            | 0           | Primary              |
| 201528770        | invasive mammary carcinoma       | negative      | 0             | negative      | 0             | 1           | Primary              |
| 201528857        | invasive ductal carcinoma        | positive      | 70            | negative      | 0             | 1           | Primary              |
| 201528859        | solid papillary carcinoma        | positive      | 95            | positive      | 95            | 0           | Primary              |
| 201528996        | invasive ductal carcinoma        | positive      | 99            | positive      | 95            | 1           | Primary              |
| 201529002        | invasive ductal carcinoma        | positive      | 99            | positive      | 70            | 1           | Primary              |
| 201529010        | mucinous carcinoma               | positive      | 98            | negative      | 0             | 1           | Primary              |
| 201529049        | invasive ductal carcinoma        | positive      | 98            | positive      | 10            | 2           | Primary              |
| 201529278        | invasive lobular carcinoma       | positive      | 90            | negative      | 0             | 2           | Primary              |
| 201529463        | invasive ductal carcinoma        | negative      | 0             | negative      | 0             | 3           | Primary              |
| 201529466        | invasive ductal carcinoma        | positive      | 99            | positive      | 95            | 2           | Primary              |
| 201529553        | invasive ductal carcinoma        | positive      | 55            | positive      | 55            | None        | Primary              |

| Pathology_Number | Diagnosis                        | ER positivity | ER percentage | PR positivity | PR percentage | Her-2 score | Primary or Recurrent |
|------------------|----------------------------------|---------------|---------------|---------------|---------------|-------------|----------------------|
| 201529555        | invasive ductal carcinoma        | positive      | 10            | positive      | 10            | 3           | Primary              |
| 201529556        | invasive ductal carcinoma        | positive      | 99            | positive      | 45            | 1           | Primary              |
| 201529684        | invasive mammary carcinoma       | positive      | 98            | positive      | 98            | 0           | Primary              |
| 201529685        | invasive ductal carcinoma        | positive      | 98            | positive      | 98            | 1           | Primary              |
| 201529840        | invasive ductal carcinoma        | negative      | 0             | negative      | 0             | None        | Primary              |
| 201529841        | encapsulated papillary carcinoma | positive      | 98            | positive      | 99            | None        | Primary              |
| 201529872        | invasive ductal carcinoma        | positive      | 85            | positive      | 80            | 3           | Primary              |
| 201529875        | invasive ductal carcinoma        | positive      | 99            | negative      | 0             | 2           | Primary              |
| 201530095        | invasive ductal carcinoma        | positive      | 98            | positive      | 30            | 2           | Primary              |
| 201530096        | invasive ductal carcinoma        | negative      | 0             | negative      | 0             | 1           | Primary              |
| 201530151        | invasive ductal carcinoma        | positive      | 99            | negative      | 0             | 1           | Primary              |
| 201530152        | invasive ductal carcinoma        | negative      | 0             | negative      | 0             | 0           | Primary              |
| 201530159        | invasive ductal carcinoma        | negative      | 0             | negative      | 0             | 3           | Primary              |
| 201530393        | invasive ductal carcinoma        | positive      | 95            | positive      | 98            | 2           | Primary              |
| 201530395        | invasive ductal carcinoma        | positive      | 90            | positive      | 10            | 2           | Primary              |
| 201530401        | mucinous carcinoma               | positive      | 95            | negative      | 0             | 3           | Primary              |
| 201530485        | invasive ductal carcinoma        | positive      | 98            | positive      | 65            | 0           | Primary              |
| 201530486        | invasive ductal carcinoma        | positive      | 100           | positive      | 100           | 2           | Primary              |
| 201530594        | invasive ductal carcinoma        | positive      | 98            | positive      | 98            | 2           | Primary              |
| 201530595        | invasive ductal carcinoma        | positive      | 98            | None          | None          | 2           | Primary              |
| 201530596        | invasive ductal carcinoma        | positive      | 100           | positive      | 100           | 1           | Primary              |
| 201530598        | invasive ductal carcinoma        | negative      | 0             | negative      | 0             | 3           | Primary              |
| 201530656        | invasive ductal carcinoma        | positive      | 98            | positive      | 5             | 0           | Primary              |
| 201530757        | invasive ductal carcinoma        | positive      | 75            | negative      | 0             | 3           | Primary              |
| 201530913        | invasive ductal carcinoma        | positive      | 98            | negative      | 0             | 2           | Primary              |
| 201530998        | invasive ductal carcinoma        | positive      | 100           | positive      | 90            | 0           | Primary              |
| 201530999        | invasive ductal carcinoma        | negative      | 0             | negative      | 0             | 1           | Primary              |
| 201531004        | invasive ductal carcinoma        | positive      | 100           | positive      | 5             | 2           | Primary              |
| 201531110        | invasive ductal carcinoma        | positive      | 95            | positive      | 15            | 0           | Primary              |
| 201531258        | invasive ductal carcinoma        | negative      | 0             | negative      | 0             | 3           | Primary              |
| 201531259        | invasive ductal carcinoma        | positive      | 98            | positive      | 35            | 2           | Primary              |
| 201531261        | invasive ductal carcinoma        | negative      | 0             | negative      | 0             | 2           | Primary              |
| 201531299        | invasive ductal carcinoma        | negative      | 0             | negative      | 0             | 2           | Primary              |
| 201531507        | invasive ductal carcinoma        | positive      | 95            | positive      | 20            | 2           | Primary              |
| 201531597        | mucinous carcinoma               | positive      | 99            | positive      | 90            | 2           | Primary              |
| 201531600        | invasive ductal carcinoma        | positive      | 95            | positive      | 99            | 1           | Primary              |
| 201531829        | invasive ductal carcinoma        | positive      | 98            | positive      | 98            | 1           | Primary              |



| Pathology_Number | Diagnosis                  | ER positivity | ER percentage | PR positivity | PR percentage | Her-2 score | Primary or Recurrent |
|------------------|----------------------------|---------------|---------------|---------------|---------------|-------------|----------------------|
| 201531830        | invasive ductal carcinoma  | negative      | 0             | negative      | 0             | 0           | Primary              |
| 201531831        | invasive ductal carcinoma  | positive      | 90            | positive      | 95            | 0           | Primary              |
| 201531949        | invasive ductal carcinoma  | positive      | 90            | positive      | 98            | 1           | Primary              |
| 201532147        | invasive ductal carcinoma  | positive      | 65            | positive      | 3             | 1           | Primary              |
| 201532178        | invasive ductal carcinoma  | negative      | 0             | negative      | 0             | 0           | Primary              |
| 201532244        | invasive ductal carcinoma  | positive      | 65            | positive      | 80            | 0           | Primary              |
| 201532449        | invasive ductal carcinoma  | negative      | 0             | None          | None          | None        | Primary              |
| 201532451        | invasive ductal carcinoma  | negative      | 0             | negative      | 0             | 3           | Primary              |
| 201532453        | invasive ductal carcinoma  | negative      | 0             | negative      | 0             | 3           | Primary              |
| 201532490        | invasive ductal carcinoma  | positive      | 30            | negative      | 0             | 2           | Primary              |
| 201532492        | invasive ductal carcinoma  | positive      | 80            | positive      | 98            | 0           | Primary              |
| 201532788        | invasive ductal carcinoma  | positive      | 98            | positive      | 98            | 1           | Primary              |
| 201532789        | invasive ductal carcinoma  | negative      | 0             | negative      | 0             | 3           | Primary              |
| 201532967        | invasive ductal carcinoma  | positive      | 70            | positive      | 90            | 3           | Primary              |
| 201532983        | invasive ductal carcinoma  | positive      | 80            | positive      | 3             | 0           | Primary              |
| 201533039        | invasive ductal carcinoma  | positive      | 80            | positive      | 85            | 0           | Primary              |
| 201533040        | neuroendocrine carcinoma   | positive      | 90            | positive      | 90            | 2           | Primary              |
| 201533170        | invasive ductal carcinoma  | positive      | 98            | negative      | 0             | 1           | Primary              |
| 201533171        | invasive ductal carcinoma  | negative      | 0             | negative      | 0             | 0           | Primary              |
| 201533172        | invasive ductal carcinoma  | positive      | 70            | negative      | 0             | 2           | Primary              |
| 201533424        | invasive ductal carcinoma  | negative      | 0             | negative      | 0             | 0           | Primary              |
| 201533577        | invasive ductal carcinoma  | positive      | 98            | positive      | 98            | 1           | Primary              |
| 201533800        | invasive lobular carcinoma | negative      | 0             | negative      | 0             | 3           | Primary              |
| 201533873        | invasive ductal carcinoma  | positive      | 99            | positive      | 60            | 1           | Primary              |
| 201533959        | invasive ductal carcinoma  | positive      | 95            | positive      | 80            | 1           | Primary              |
| 201534033        | invasive ductal carcinoma  | positive      | 98            | positive      | 70            | 2           | Primary              |
| 201534034        | invasive ductal carcinoma  | positive      | 80            | negative      | 0             | 2           | Primary              |
| 201534037        | invasive ductal carcinoma  | negative      | 0             | negative      | 0             | 1           | Primary              |
| 201534240        | invasive ductal carcinoma  | positive      | 99            | positive      | 90            | 0           | Primary              |
| 201534242        | mucinous carcinoma         | positive      | 99            | positive      | 20            | 0           | Primary              |
| 201534373        | invasive ductal carcinoma  | positive      | 95            | positive      | 55            | 0           | Primary              |
| 201534374        | invasive ductal carcinoma  | negative      | 0             | negative      | 0             | 0           | Primary              |
| 201534408        | invasive ductal carcinoma  | positive      | 80            | positive      | 90            | 0           | Primary              |
| 201534455        | invasive ductal carcinoma  | None          | None          | None          | None          | None        | Primary              |
| 201534457        | invasive ductal carcinoma  | positive      | 90            | negative      | 0             | 1           | Primary              |
| 201534617        | invasive ductal carcinoma  | negative      | 0             | negative      | 0             | 3           | Primary              |
| 201534619        | invasive ductal carcinoma  | positive      | 95            | positive      | 95            | 2           | Primary              |
| 201534620        | invasive ductal carcinoma  | positive      | 99            | positive      | 99            | 0           | Primary              |

| Pathology_Number | Diagnosis                  | ER positivity | ER percentage | PR positivity | PR percentage | Her-2 score | Primary or Recurrent |
|------------------|----------------------------|---------------|---------------|---------------|---------------|-------------|----------------------|
| 201534622        | invasive ductal carcinoma  | negative      | 0             | negative      | 0             | 2           | Primary              |
| 201534697        | invasive ductal carcinoma  | negative      | 0             | negative      | 0             | 0           | Primary              |
| 201534699        | invasive ductal carcinoma  | None          | None          | None          | None          | None        | Primary              |
| 201534839        | invasive ductal carcinoma  | positive      | 55            | positive      | 10            | 0           | Primary              |
| 201534844        | invasive ductal carcinoma  | negative      | 0             | negative      | 0             | 0           | Primary              |
| 201534908        | invasive ductal carcinoma  | positive      | 100           | negative      | 0             | 2           | Primary              |
| 201535018        | invasive ductal carcinoma  | negative      | 0             | negative      | 0             | 0           | Primary              |
| 201535078        | invasive ductal carcinoma  | positive      | 90            | positive      | 30            | 1           | Primary              |
| 201535080        | invasive ductal carcinoma  | positive      | 98            | positive      | 85            | 2           | Primary              |
| 201535091        | invasive ductal carcinoma  | positive      | 98            | positive      | 2             | 1           | Primary              |
| 201535194        | invasive ductal carcinoma  | negative      | 0             | negative      | 0             | 3           | Primary              |
| 201535390        | invasive ductal carcinoma  | positive      | 90            | positive      | 70            | 0           | Primary              |
| 201535456        | invasive ductal carcinoma  | positive      | 98            | positive      | 70            | 0           | Primary              |
| 201535638        | invasive ductal carcinoma  | positive      | 99            | positive      | 5             | 0           | Primary              |
| 201535804        | invasive ductal carcinoma  | positive      | 85            | positive      | 90            | 0           | Primary              |
| 201535876        | invasive ductal carcinoma  | negative      | 0             | negative      | 0             | 0           | Primary              |
| 201535887        | invasive ductal carcinoma  | positive      | 99            | positive      | 99            | 0           | Primary              |
| 201535888        | invasive ductal carcinoma  | positive      | 90            | positive      | 99            | 0           | Primary              |
| 201536021        | invasive ductal carcinoma  | negative      | 0             | negative      | 0             | 1           | Primary              |
| 201536057        | invasive ductal carcinoma  | negative      | 0             | negative      | 0             | 3           | Primary              |
| 201536102        | invasive ductal carcinoma  | negative      | 0             | negative      | 0             | 3           | Primary              |
| 201536245        | invasive ductal carcinoma  | positive      | 85            | positive      | 55            | 1           | Primary              |
| 201536248        | invasive ductal carcinoma  | positive      | 99            | positive      | 2             | 2           | Primary              |
| 201536379        | invasive ductal carcinoma  | positive      | 80            | positive      | 30            | 1           | Primary              |
| 201536380        | invasive ductal carcinoma  | positive      | 90            | positive      | 5             | 0           | Primary              |
| 201536381        | invasive ductal carcinoma  | positive      | 90            | positive      | 70            | 1           | Primary              |
| 201536596        | invasive lobular carcinoma | positive      | 90            | positive      | 99            | 1           | Primary              |
| 201536597        | invasive lobular carcinoma | positive      | 55            | positive      | 90            | 0           | Primary              |
| 201536627        | mucinous carcinoma         | positive      | 99            | positive      | 5             | 0           | Primary              |
| 201536864        | invasive ductal carcinoma  | positive      | 85            | positive      | 2             | 0           | Primary              |
| 201536998        | invasive lobular carcinoma | positive      | 98            | positive      | 99            | 1           | Primary              |
| 201537000        | mucinous carcinoma         | positive      | 95            | positive      | 35            | 0           | Primary              |
| 201537004        | invasive ductal carcinoma  | positive      | 99            | positive      | 99            | 0           | Primary              |
| 201537006        | invasive ductal carcinoma  | positive      | 90            | positive      | 2             | 1           | Primary              |
| 201537048        | invasive ductal carcinoma  | positive      | 60            | negative      | 0             | 3           | Primary              |
| 201537101        | invasive lobular carcinoma | positive      | 70            | positive      | 30            | 0           | Primary              |
| 201537103        | invasive ductal carcinoma  | positive      | 80            | positive      | 2             | 1           | Recurrent            |
| 201537292        | invasive ductal carcinoma  | negative      | 0             | negative      | 0             | 2           | Primary              |

| Pathology_Number | Diagnosis                         | ER positivity | ER percentage | PR positivity | PR percentage | Her-2 score | Primary or Recurrent |
|------------------|-----------------------------------|---------------|---------------|---------------|---------------|-------------|----------------------|
| 201537486        | invasive lobular carcinoma        | positive      | 99            | positive      | 40            | 0           | Primary              |
| 201537646        | invasive ductal carcinoma         | positive      | 80            | positive      | 90            | 2           | Primary              |
| 201537647        | invasive ductal carcinoma         | positive      | 98            | None          | None          | 2           | Primary              |
| 201537651        | invasive ductal carcinoma         | positive      | 90            | positive      | 3             | 1           | Primary              |
| 201537653        | invasive ductal carcinoma         | negative      | 0             | negative      | 0             | 2           | Primary              |
| 201537745        | invasive ductal carcinoma         | negative      | 0             | negative      | 0             | 3           | Primary              |
| 201537746        | invasive ductal carcinoma         | positive      | 95            | positive      | 98            | 0           | Primary              |
| 201537969        | invasive ductal carcinoma         | positive      | 55            | positive      | 98            | 0           | Primary              |
| 201538161        | invasive ductal carcinoma         | positive      | 95            | positive      | 90            | 0           | Primary              |
| 201538192        | invasive ductal carcinoma         | positive      | 95            | positive      | 80            | 2           | Primary              |
| 201538260        | invasive ductal carcinoma         | positive      | -1            | positive      | -1            | 0           | Primary              |
| 201538370        | invasive ductal carcinoma         | positive      | 70            | positive      | 5             | 1           | Primary              |
| 201538574        | invasive ductal carcinoma         | positive      | 70            | positive      | 98            | 1           | Primary              |
| 201538575        | invasive ductal carcinoma         | positive      | 70            | negative      | 0             | 1           | Primary              |
| 201538770        | invasive ductal carcinoma         | negative      | 0             | negative      | 0             | 3           | Primary              |
| 201539005        | invasive ductal carcinoma         | negative      | 0             | negative      | 0             | 3           | Primary              |
| 201539008        | invasive ductal carcinoma         | positive      | 60            | negative      | 0             | 0           | Primary              |
| 201539082        | invasive ductal carcinoma         | positive      | 90            | positive      | 98            | 1           | Primary              |
| 201539083        | invasive ductal carcinoma         | positive      | -1            | positive      | -1            | 0           | Primary              |
| 201539178        | invasive ductal carcinoma         | positive      | 90            | negative      | 0             | 1           | Primary              |
| 201539346        | invasive ductal carcinoma         | positive      | 95            | positive      | 45            | 0           | Primary              |
| 201539526        | invasive ductal carcinoma         | negative      | 0             | negative      | 0             | 0           | Primary              |
| 201539527        | mucinous carcinoma                | positive      | 95            | positive      | 99            | 0           | Primary              |
| 201539571        | invasive ductal carcinoma         | positive      | 70            | positive      | 20            | 0           | Primary              |
| 201539828        | invasive ductal carcinoma         | negative      | 0             | negative      | 0             | 0           | Primary              |
| 201539829        | invasive micropapillary carcinoma | positive      | 20            | negative      | 0             | 0           | Primary              |
| 201539838        | invasive lobular carcinoma        | positive      | 98            | positive      | 90            | 1           | Primary              |
| 201539839        | invasive ductal carcinoma         | positive      | 80            | positive      | 55            | 0           | Primary              |
| 201540058        | invasive ductal carcinoma         | positive      | 98            | negative      | 0             | 2           | Primary              |
| 201540237        | invasive ductal carcinoma         | positive      | 70            | positive      | 40            | 1           | Primary              |
| 201540335        | invasive ductal carcinoma         | negative      | 0             | negative      | 0             | 3           | Primary              |
| 201540337        | invasive ductal carcinoma         | positive      | 99            | positive      | 10            | 3           | Primary              |
| 201540338        | invasive ductal carcinoma         | negative      | 0             | negative      | 0             | 0           | Primary              |
| 201540476        | invasive ductal carcinoma         | positive      | 99            | positive      | 99            | 1           | Primary              |
| 201540479        | invasive ductal carcinoma         | positive      | 95            | positive      | 85            | 0           | Primary              |
| 201540480        | invasive lobular carcinoma        | negative      | 0             | negative      | 0             | 2           | Primary              |
| 201540490        | invasive ductal carcinoma         | negative      | 0             | negative      | 0             | 1           | Primary              |

| Pathology_Number | Diagnosis                  | ER positivity | ER percentage | PR positivity | PR percentage | Her-2 score | Primary or Recurrent |
|------------------|----------------------------|---------------|---------------|---------------|---------------|-------------|----------------------|
| 201540555        | invasive ductal carcinoma  | negative      | 0             | negative      | 0             | 3           | Primary              |
| 201540556        | invasive ductal carcinoma  | negative      | 0             | negative      | 0             | 3           | Primary              |
| 201540697        | invasive ductal carcinoma  | negative      | 0             | negative      | 0             | 0           | Primary              |
| 201540775        | invasive ductal carcinoma  | positive      | 90            | positive      | 20            | 2           | Primary              |
| 201540776        | invasive ductal carcinoma  | positive      | 90            | positive      | 98            | 0           | Primary              |
| 201540777        | invasive lobular carcinoma | positive      | 60            | positive      | 98            | 1           | Primary              |
| 201540855        | invasive ductal carcinoma  | negative      | 0             | negative      | 0             | 3           | Primary              |
| 201541023        | invasive ductal carcinoma  | positive      | 80            | positive      | 5             | 2           | Primary              |
| 201541158        | invasive ductal carcinoma  | positive      | 98            | positive      | 99            | 2           | Primary              |
| 201541420        | invasive lobular carcinoma | positive      | 98            | positive      | 40            | 0           | Primary              |
| 201541421        | invasive ductal carcinoma  | positive      | 90            | negative      | 0             | 0           | Primary              |
| 201541583        | invasive ductal carcinoma  | negative      | 0             | negative      | 0             | 1           | Primary              |
| 201541720        | invasive ductal carcinoma  | positive      | 90            | positive      | 40            | 2           | Primary              |
| 201541738        | invasive ductal carcinoma  | positive      | 90            | positive      | 70            | 2           | Primary              |
| 201541982        | invasive ductal carcinoma  | negative      | 0             | positive      | 40            | 1           | Primary              |
| 201541990        | invasive ductal carcinoma  | positive      | 99            | positive      | 99            | 0           | Primary              |
| 201542094        | invasive ductal carcinoma  | negative      | 0             | negative      | 0             | 0           | Primary              |
| 201542260        | solid papillary carcinoma  | positive      | 98            | positive      | 98            | None        | Primary              |
| 201542262        | invasive ductal carcinoma  | negative      | 0             | negative      | 0             | 2           | Primary              |
| 201542446        | mucinous carcinoma         | positive      | 98            | positive      | 10            | 0           | Primary              |
| 201542449        | invasive ductal carcinoma  | positive      | 90            | positive      | 40            | 2           | Primary              |
| 201542522        | invasive ductal carcinoma  | negative      | 0             | negative      | 0             | 3           | Primary              |
| 201542523        | invasive ductal carcinoma  | positive      | 40            | positive      | 2             | 2           | Primary              |
| 201542524        | invasive ductal carcinoma  | positive      | 90            | positive      | 95            | 0           | Primary              |
| 201542525        | invasive ductal carcinoma  | positive      | 70            | positive      | 95            | 1           | Primary              |
| 201542867        | invasive ductal carcinoma  | positive      | 99            | positive      | 90            | 0           | Primary              |
| 201542869        | invasive ductal carcinoma  | negative      | 0             | negative      | 0             | 1           | Primary              |
| 201542874        | invasive ductal carcinoma  | positive      | 98            | negative      | 0             | 1           | Primary              |
| 201542898        | invasive ductal carcinoma  | positive      | 80            | positive      | 99            | 0           | Primary              |
| 201542937        | invasive ductal carcinoma  | positive      | 80            | negative      | 0             | 2           | Primary              |
| 201542938        | invasive ductal carcinoma  | negative      | 0             | negative      | 0             | 3           | Recurrent            |
| 201542939        | invasive ductal carcinoma  | negative      | 0             | negative      | 0             | 3           | Primary              |
| 201542940        | invasive ductal carcinoma  | positive      | 99            | positive      | 99            | 1           | Primary              |
| 201543081        | invasive ductal carcinoma  | positive      | 90            | positive      | 99            | 0           | Primary              |
| 201543138        | invasive lobular carcinoma | negative      | 0             | negative      | 0             | 1           | Primary              |
| 201543150        | invasive ductal carcinoma  | positive      | 80            | positive      | 10            | 2           | Primary              |
| 201543471        | invasive ductal carcinoma  | positive      | 40            | positive      | 5             | 1           | Primary              |
| 201543571        | invasive ductal carcinoma  | positive      | 99            | positive      | 99            | 2           | Primary              |

| Pathology_Number | Diagnosis                  | ER positivity | ER percentage | PR positivity | PR percentage | Her-2 score | Primary or Recurrent |
|------------------|----------------------------|---------------|---------------|---------------|---------------|-------------|----------------------|
| 201543572        | invasive ductal carcinoma  | positive      | 20            | negative      | 0             | 1           | Primary              |
| 201543579        | invasive ductal carcinoma  | positive      | 5             | positive      | 70            | 1           | Primary              |
| 201543794        | invasive ductal carcinoma  | positive      | 55            | negative      | 0             | 3           | Primary              |
| 201543796        | invasive ductal carcinoma  | positive      | 95            | positive      | 85            | 1           | Primary              |
| 201543802        | invasive ductal carcinoma  | positive      | 98            | positive      | 95            | 1           | Primary              |
| 201543822        | invasive ductal carcinoma  | positive      | 60            | positive      | 85            | 2           | Primary              |
| 201543879        | invasive ductal carcinoma  | positive      | 90            | positive      | 99            | 0           | Primary              |
| 201543880        | invasive ductal carcinoma  | negative      | 0             | negative      | 0             | 0           | Primary              |
| 201543990        | invasive ductal carcinoma  | positive      | 2             | negative      | 0             | 2           | Primary              |
| 201543997        | invasive ductal carcinoma  | negative      | 0             | negative      | 0             | 3           | Primary              |
| 201544062        | invasive ductal carcinoma  | negative      | 0             | negative      | 0             | 2           | Primary              |
| 201544063        | invasive ductal carcinoma  | positive      | 98            | negative      | 0             | None        | Primary              |
| 201544217        | invasive ductal carcinoma  | positive      | 45            | positive      | 15            | 1           | Primary              |
| 201544220        | invasive mammary carcinoma | negative      | 0             | negative      | 0             | 3           | Primary              |
| 201544221        | invasive ductal carcinoma  | positive      | 60            | positive      | 98            | 2           | Primary              |
| 201544246        | neuroendocrine carcinoma   | negative      | 0             | negative      | 0             | 0           | Primary              |
| 201544247        | invasive ductal carcinoma  | positive      | 90            | positive      | 99            | 1           | Primary              |
| 201544248        | invasive ductal carcinoma  | positive      | 30            | positive      | 3             | 0           | Primary              |
| 201544261        | mucinous carcinoma         | positive      | 85            | positive      | 99            | 0           | Primary              |
| 201544484        | invasive ductal carcinoma  | positive      | 65            | positive      | 75            | 1           | Primary              |
| 201544700        | invasive ductal carcinoma  | negative      | 0             | negative      | 0             | 3           | Primary              |
| 201544701        | invasive ductal carcinoma  | negative      | 0             | negative      | 0             | 0           | Primary              |
| 201544704        | invasive ductal carcinoma  | positive      | 90            | positive      | 90            | 1           | Primary              |
| 201544729        | mucinous carcinoma         | positive      | 98            | positive      | 90            | 0           | Primary              |
| 201544782        | invasive ductal carcinoma  | positive      | 98            | positive      | 98            | 0           | Primary              |
| 201544784        | invasive ductal carcinoma  | negative      | 0             | negative      | 0             | 3           | Primary              |
| 201544785        | invasive ductal carcinoma  | positive      | 70            | positive      | 45            | 0           | Primary              |
| 201544889        | metaplastic carcinoma      | negative      | 0             | negative      | 0             | 0           | Primary              |
| 201544891        | invasive ductal carcinoma  | positive      | 95            | positive      | 90            | 0           | Primary              |
| 201544896        | invasive mammary carcinoma | positive      | 55            | positive      | 90            | 1           | Primary              |
| 201544958        | invasive ductal carcinoma  | positive      | 95            | positive      | 90            | 0           | Primary              |
| 201545093        | invasive ductal carcinoma  | positive      | 85            | positive      | 35            | 0           | Primary              |
| 201545095        | invasive ductal carcinoma  | positive      | 60            | positive      | 80            | 0           | Primary              |
| 201545165        | invasive ductal carcinoma  | positive      | 2             | negative      | 0             | 0           | Primary              |
| 201545304        | invasive ductal carcinoma  | positive      | 99            | positive      | 99            | 3           | Primary              |
| 201545385        | invasive ductal carcinoma  | positive      | 100           | positive      | 100           | 1           | Primary              |
| 201545401        | invasive ductal carcinoma  | positive      | 99            | positive      | 20            | 3           | Primary              |
| 201545536        | invasive ductal carcinoma  | positive      | 99            | negative      | 0             | 2           | Primary              |

| Pathology_Number | Diagnosis                  | ER positivity | ER percentage | PR positivity | PR percentage | Her-2 score | Primary or Recurrent |
|------------------|----------------------------|---------------|---------------|---------------|---------------|-------------|----------------------|
| 201545831        | invasive ductal carcinoma  | positive      | 99            | positive      | 65            | 2           | Primary              |
| 201545833        | invasive ductal carcinoma  | positive      | 99            | positive      | 20            | 1           | Primary              |
| 201545848        | invasive ductal carcinoma  | positive      | 85            | positive      | 85            | 0           | Primary              |
| 201545915        | invasive ductal carcinoma  | negative      | 0             | negative      | 0             | 1           | Primary              |
| 201545916        | mucinous carcinoma         | positive      | 99            | positive      | 10            | 0           | Primary              |
| 201545917        | invasive ductal carcinoma  | positive      | 99            | positive      | 2             | 0           | Primary              |
| 201546081        | invasive ductal carcinoma  | positive      | 99            | positive      | 99            | 1           | Primary              |
| 201546088        | invasive ductal carcinoma  | positive      | 80            | positive      | 55            | 1           | Primary              |
| 201546274        | invasive ductal carcinoma  | positive      | 99            | positive      | 2             | 2           | Primary              |
| 201546385        | invasive ductal carcinoma  | negative      | 0             | negative      | 0             | 3           | Primary              |
| 201546533        | invasive lobular carcinoma | positive      | 98            | positive      | 95            | 0           | Primary              |
| 201546534        | invasive ductal carcinoma  | negative      | 0             | negative      | 0             | 1           | Primary              |
| 201546535        | invasive ductal carcinoma  | positive      | 99            | positive      | 55            | 1           | Primary              |
| 201546536        | invasive ductal carcinoma  | positive      | 95            | positive      | 70            | 2           | Primary              |
| 201546782        | invasive ductal carcinoma  | positive      | 98            | negative      | 0             | 2           | Primary              |
| 201547057        | invasive ductal carcinoma  | positive      | 99            | positive      | 20            | 1           | Primary              |
| 201547227        | invasive ductal carcinoma  | positive      | 60            | negative      | 0             | 3           | Primary              |
| 201547293        | invasive ductal carcinoma  | positive      | 85            | positive      | 45            | 3           | Primary              |
| 201547294        | solid papillary carcinoma  | positive      | 95            | positive      | 95            | 1           | Primary              |
| 201547295        | invasive ductal carcinoma  | positive      | 70            | positive      | 60            | 1           | Primary              |
| 201547296        | invasive ductal carcinoma  | positive      | 99            | positive      | 99            | 1           | Primary              |
| 201547413        | invasive ductal carcinoma  | positive      | 98            | positive      | 70            | 1           | Primary              |
| 201547489        | invasive ductal carcinoma  | positive      | 90            | positive      | 98            | 1           | Primary              |
| 201547490        | invasive ductal carcinoma  | positive      | 80            | positive      | 98            | 1           | Primary              |
| 201547494        | invasive ductal carcinoma  | negative      | 0             | negative      | 0             | 0           | Primary              |
| 201547685        | invasive ductal carcinoma  | None          | None          | None          | None          | None        | Primary              |
| 201547686        | invasive ductal carcinoma  | positive      | 99            | negative      | 0             | 1           | Primary              |
| 201547699        | invasive ductal carcinoma  | positive      | 10            | negative      | 0             | 3           | Primary              |
| 201547963        | invasive ductal carcinoma  | positive      | 99            | positive      | 99            | 1           | Primary              |
| 201548164        | invasive ductal carcinoma  | positive      | 80            | positive      | 30            | 1           | Primary              |
| 201548169        | invasive ductal carcinoma  | positive      | 99            | positive      | 1             | 3           | Primary              |
| 201548170        | invasive ductal carcinoma  | positive      | 99            | negative      | 0             | 2           | Primary              |
| 201548240        | invasive ductal carcinoma  | positive      | 99            | positive      | 99            | 0           | Primary              |
| 201548384        | invasive ductal carcinoma  | negative      | 0             | negative      | 0             | 3           | Primary              |
| 201548385        | mucinous carcinoma         | positive      | 80            | negative      | 0             | 1           | Primary              |
| 201548390        | invasive mammary carcinoma | positive      | 99            | positive      | 5             | 1           | Primary              |
| 201548407        | invasive ductal carcinoma  | positive      | 98            | positive      | 98            | 1           | Primary              |
| 201548463        | invasive ductal carcinoma  | positive      | 98            | positive      | 99            | 0           | Primary              |

| Pathology_Number | Diagnosis                  | ER positivity | ER percentage | PR positivity | PR percentage | Her-2 score | Primary or Recurrent |
|------------------|----------------------------|---------------|---------------|---------------|---------------|-------------|----------------------|
| 201548576        | invasive ductal carcinoma  | positive      | 99            | positive      | 95            | 2           | Primary              |
| 201548578        | invasive ductal carcinoma  | positive      | 99            | positive      | 98            | 2           | Primary              |
| 201548579        | invasive ductal carcinoma  | positive      | 99            | negative      | 0             | 2           | Primary              |
| 201548610        | invasive ductal carcinoma  | negative      | 0             | negative      | 0             | 0           | Primary              |
| 201548652        | invasive ductal carcinoma  | positive      | 98            | positive      | 99            | 0           | Primary              |
| 201548653        | invasive ductal carcinoma  | negative      | 0             | negative      | 0             | 3           | Primary              |
| 201548654        | metaplastic carcinoma      | negative      | 0             | negative      | 0             | 0           | Primary              |
| 201548655        | invasive ductal carcinoma  | negative      | 0             | negative      | 0             | 3           | Primary              |
| 201548807        | invasive ductal carcinoma  | positive      | 99            | positive      | 30            | 0           | Primary              |
| 201548808        | invasive ductal carcinoma  | negative      | 0             | negative      | 0             | 0           | Primary              |
| 201548810        | invasive ductal carcinoma  | positive      | 99            | positive      | 1             | 1           | Primary              |
| 201548875        | invasive ductal carcinoma  | positive      | 99            | positive      | 99            | 0           | Primary              |
| 201548877        | invasive ductal carcinoma  | positive      | 99            | positive      | 85            | 0           | Primary              |
| 201549256        | invasive ductal carcinoma  | positive      | 99            | positive      | 90            | 1           | Primary              |
| 201549257        | invasive ductal carcinoma  | positive      | 99            | None          | None          | 1           | Primary              |
| 201549275        | invasive ductal carcinoma  | positive      | 98            | positive      | 98            | 0           | Primary              |
| 201549336        | invasive ductal carcinoma  | positive      | 98            | negative      | 0             | 3           | Primary              |
| 201549337        | invasive ductal carcinoma  | positive      | 98            | positive      | 98            | 0           | Primary              |
| 201549440        | invasive ductal carcinoma  | negative      | 0             | negative      | 0             | 3           | Primary              |
| 201549544        | invasive ductal carcinoma  | positive      | 95            | positive      | 90            | None        | Primary              |
| 201549545        | invasive ductal carcinoma  | positive      | 95            | positive      | 99            | 2           | Primary              |
| 201549546        | invasive ductal carcinoma  | positive      | 90            | positive      | 3             | 2           | Primary              |
| 201549547        | invasive ductal carcinoma  | positive      | 80            | positive      | 80            | 0           | Primary              |
| 201549740        | invasive lobular carcinoma | positive      | 95            | positive      | 99            | 0           | Primary              |
| 201549742        | invasive ductal carcinoma  | positive      | 98            | positive      | 95            | 0           | Primary              |
| 201549743        | invasive ductal carcinoma  | positive      | 15            | negative      | 0             | 1           | Primary              |
| 201549744        | invasive ductal carcinoma  | negative      | 0             | negative      | 0             | 0           | Primary              |
| 201549745        | invasive ductal carcinoma  | None          | None          | None          | None          | None        | Primary              |
| 201549900        | invasive ductal carcinoma  | positive      | 99            | negative      | 0             | 0           | Primary              |
| 201549905        | invasive ductal carcinoma  | positive      | 99            | positive      | 55            | 1           | Primary              |
| 201550107        | invasive ductal carcinoma  | positive      | 95            | positive      | 99            | 1           | Primary              |
| 201550108        | invasive ductal carcinoma  | positive      | 99            | positive      | 99            | 1           | Primary              |
| 201550109        | invasive lobular carcinoma | positive      | 98            | positive      | 98            | 1           | Primary              |
| 201550111        | invasive ductal carcinoma  | negative      | 0             | negative      | 0             | 3           | Primary              |
| 201550112        | invasive lobular carcinoma | positive      | 90            | None          | None          | 0           | Primary              |
| 201550114        | invasive lobular carcinoma | positive      | 30            | positive      | 95            | 0           | Primary              |
| 201550308        | invasive ductal carcinoma  | positive      | 98            | negative      | 0             | 0           | Primary              |
| 201550309        | invasive ductal carcinoma  | positive      | 95            | positive      | 90            | 1           | Primary              |

| Pathology_Number | Diagnosis                  | ER positivity | ER percentage | PR positivity | PR percentage | Her-2 score | Primary or Recurrent |
|------------------|----------------------------|---------------|---------------|---------------|---------------|-------------|----------------------|
| 201550310        | invasive ductal carcinoma  | positive      | 98            | positive      | 99            | 1           | Primary              |
| 201550312        | invasive ductal carcinoma  | negative      | 0             | negative      | 0             | 1           | Primary              |
| 201550313        | invasive ductal carcinoma  | negative      | 0             | negative      | 0             | 0           | Primary              |
| 201550328        | invasive ductal carcinoma  | positive      | 55            | negative      | 0             | 2           | Recurrent            |
| 201550522        | invasive mammary carcinoma | positive      | 99            | positive      | 3             | 2           | Primary              |
| 201550527        | invasive ductal carcinoma  | positive      | 99            | positive      | 70            | 2           | Primary              |
| 201550616        | invasive ductal carcinoma  | positive      | 99            | positive      | 15            | 2           | Primary              |
| 201550730        | invasive ductal carcinoma  | positive      | 90            | positive      | 70            | 2           | Primary              |
| 201550794        | invasive lobular carcinoma | positive      | 99            | positive      | 99            | 1           | Primary              |
| 201550795        | invasive ductal carcinoma  | positive      | 99            | positive      | 10            | 2           | Primary              |
| 201550981        | invasive ductal carcinoma  | positive      | 3             | negative      | 0             | 3           | Primary              |
| 201551003        | invasive ductal carcinoma  | positive      | 98            | positive      |               | 0           | Primary              |
| 201551005        | invasive ductal carcinoma  | negative      | 0             | negative      | 0             | 2           | Primary              |
| 201551006        | invasive ductal carcinoma  | negative      | 0             | negative      | 0             | 2           | Primary              |
| 201551470        | mucinous carcinoma         | positive      | 99            | positive      | 99            | 1           | Primary              |
| 201551480        | invasive ductal carcinoma  | positive      | 99            | positive      | 95            | 1           | Primary              |
| 201551481        | invasive ductal carcinoma  | negative      | 0             | positive      | 2             | 3           | Primary              |
| 201551482        | invasive ductal carcinoma  | positive      | 99            | positive      | 98            | 1           | Primary              |
| 201551681        | invasive ductal carcinoma  | positive      | 99            | positive      | 45            | 0           | Primary              |
| 201551751        | invasive ductal carcinoma  | positive      | 99            | positive      | 99            | 2           | Primary              |
| 201551753        | invasive ductal carcinoma  | positive      | 99            | positive      | 99            | 2           | Primary              |
| 201551863        | invasive mammary carcinoma | negative      | 0             | negative      | 0             | 3           | Primary              |
| 201551864        | invasive ductal carcinoma  | negative      | 0             | negative      | 0             | 3           | Primary              |
| 201551996        | invasive lobular carcinoma | positive      | 98            | positive      | 98            | 0           | Primary              |
| 201552000        | invasive ductal carcinoma  | positive      | 99            | positive      | 5             | 2           | Primary              |
| 201552100        | invasive ductal carcinoma  | negative      | 0             | negative      | 0             | 0           | Primary              |
| 201552102        | invasive ductal carcinoma  | positive      | 99            | negative      | 0             | 2           | Primary              |
| 201552154        | invasive ductal carcinoma  | positive      | 20            | negative      | 0             | 0           | Primary              |
| 201552421        | invasive ductal carcinoma  | positive      | 99            | positive      | 10            | 1           | Primary              |
| 201552422        | invasive ductal carcinoma  | negative      | 0             | negative      | 0             | 3           | Primary              |
| 201552423        | invasive ductal carcinoma  | negative      | 0             | negative      | 0             | 2           | Primary              |
| 201552622        | mucinous carcinoma         | positive      | 99            | positive      | 2             | 1           | Primary              |
| 201552635        | invasive ductal carcinoma  | positive      | 95            | negative      | 0             | 2           | Primary              |
| 201552664        | invasive ductal carcinoma  | positive      | 99            | positive      | 20            | 0           | Primary              |
| 201552665        | invasive ductal carcinoma  | positive      | 95            | negative      | 0             | 1           | Primary              |
| 201552795        | invasive ductal carcinoma  | negative      | 0             | None          | None          | 2           | Primary              |
| 201552800        | invasive ductal carcinoma  | negative      | 0             | negative      | 0             | 2           | Primary              |
| 201552974        | invasive ductal carcinoma  | positive      | 99            | positive      | 95            | 2           | Primary              |



| Pathology_Number | Diagnosis                  | ER positivity | ER percentage | PR positivity | PR percentage | Her-2 score | Primary or Recurrent |
|------------------|----------------------------|---------------|---------------|---------------|---------------|-------------|----------------------|
| 201600017        | invasive ductal carcinoma  | positive      | 99            | negative      | 0             | 2           | Primary              |
| 201600021        | invasive ductal carcinoma  | negative      | 0             | negative      | 0             | 2           | Primary              |
| 201600023        | invasive ductal carcinoma  | negative      | 0             | negative      | 0             | 2           | Primary              |
| 201600069        | invasive ductal carcinoma  | positive      | 99            | positive      | 99            | 1           | Primary              |
| 201600205        | invasive lobular carcinoma | positive      | 98            | positive      | 85            | 2           | Primary              |
| 201600323        | invasive lobular carcinoma | positive      | 99            | positive      | 4             | 1           | Primary              |
| 201600332        | invasive ductal carcinoma  | positive      | 99            | negative      | 0             | 2           | Primary              |
| 201600493        | invasive ductal carcinoma  | positive      | 98            | positive      | 98            | 1           | Primary              |
| 201600496        | invasive ductal carcinoma  | positive      | 99            | negative      | 0             | 1           | Primary              |
| 201600519        | invasive ductal carcinoma  | negative      | 0             | negative      | 0             | 3           | Recurrent            |
| 201600561        | invasive ductal carcinoma  | positive      | 99            | positive      |               | 2           | Recurrent            |
| 201600716        | invasive ductal carcinoma  | positive      | 98            | positive      | 98            | 1           | Primary              |
| 201600722        | invasive ductal carcinoma  | positive      | 99            | positive      | 99            | 0           | Primary              |
| 201600730        | invasive ductal carcinoma  | negative      | 0             | negative      | 0             | 3           | Primary              |
| 201600784        | invasive lobular carcinoma | positive      | 70            | positive      | 45            | 0           | Primary              |
| 201600786        | invasive ductal carcinoma  | negative      | 0             | negative      | 0             | 3           | Primary              |
| 201600882        | mucinous carcinoma         | positive      | 99            | positive      | 95            | 0           | Primary              |
| 201600883        | invasive ductal carcinoma  | positive      | 99            | positive      | 98            | 0           | Primary              |
| 201600967        | invasive ductal carcinoma  | positive      | 98            | positive      | 20            | 1           | Primary              |
| 201600968        | invasive ductal carcinoma  | positive      | 98            | positive      | 70            | 2           | Primary              |
| 201600969        | invasive ductal carcinoma  | positive      | 99            | positive      | 40            | 2           | Primary              |
| 201600970        | invasive ductal carcinoma  | positive      | 85            | positive      | 40            | 2           | Primary              |
| 201601116        | invasive ductal carcinoma  | positive      | 90            | positive      | 80            | 0           | Primary              |
| 201601117        | invasive ductal carcinoma  | positive      | 15            | negative      | 0             | 3           | Primary              |
| 201601120        | invasive ductal carcinoma  | negative      | 0             | negative      | 0             | 1           | Primary              |
| 201601125        | invasive ductal carcinoma  | positive      | 98            | positive      | 95            | 1           | Primary              |
| 201601163        | metaplastic carcinoma      | negative      | 0             | negative      | 0             | 0           | Primary              |
| 201601579        | invasive ductal carcinoma  | positive      | 98            | positive      | 40            | 2           | Primary              |
| 201601581        | invasive lobular carcinoma | positive      | 99            | negative      | 0             | 1           | Primary              |
| 201601687        | invasive ductal carcinoma  | positive      | 98            | positive      | 80            | 3           | Primary              |
| 201601850        | invasive ductal carcinoma  | positive      | 5             | negative      | 0             | 3           | Primary              |
| 201601851        | invasive ductal carcinoma  | positive      | 5             | negative      | 0             | 1           | Primary              |
| 201601852        | invasive ductal carcinoma  | positive      | 99            | positive      | 99            | 2           | Primary              |
| 201601985        | invasive ductal carcinoma  | positive      | 99            | positive      | 60            | 1           | Primary              |
| 201601986        | invasive ductal carcinoma  | negative      | 0             | negative      | 0             | 1           | Primary              |
| 201602088        | invasive ductal carcinoma  | negative      | 0             | negative      | 0             | 0           | Primary              |
| 201602260        | invasive ductal carcinoma  | positive      | 2             | negative      | 0             | 0           | Primary              |
| 201602261        | invasive ductal carcinoma  | positive      | 98            | positive      |               | 0           | Primary              |

| Pathology_Number | Diagnosis                  | ER positivity | ER percentage | PR positivity | PR percentage | Her-2 score | Primary or Recurrent |
|------------------|----------------------------|---------------|---------------|---------------|---------------|-------------|----------------------|
| 201602447        | invasive lobular carcinoma | positive      | 99            | positive      | 80            | 0           | Primary              |
| 201602477        | invasive mammary carcinoma | negative      | 0             | negative      | 0             | 0           | Primary              |
| 201602654        | invasive ductal carcinoma  | positive      | 99            | positive      | 55            | 2           | Primary              |
| 201602674        | invasive ductal carcinoma  | positive      | 99            | negative      | 0             | 1           | Primary              |
| 201602736        | invasive ductal carcinoma  | positive      | 98            | positive      | 98            | 1           | Primary              |
| 201602737        | mucinous carcinoma         | None          | None          | None          | None          | None        | Primary              |
| 201602859        | invasive ductal carcinoma  | positive      | 98            | positive      | 90            | 1           | Primary              |
| 201602942        | invasive ductal carcinoma  | positive      |               | positive      | 90            | 2           | Primary              |
| 201602944        | invasive ductal carcinoma  | positive      | 95            | positive      | 60            | 2           | Primary              |
| 201602945        | invasive ductal carcinoma  | positive      | 99            | positive      | 30            | 1           | Primary              |
| 201603033        | invasive mammary carcinoma | positive      | 98            | positive      | 5             | 2           | Primary              |
| 201603035        | invasive ductal carcinoma  | positive      | 10            | negative      | 0             | 2           | Primary              |
| 201603072        | mucinous carcinoma         | positive      | 99            | positive      | 95            | 0           | Primary              |
| 201603129        | invasive ductal carcinoma  | positive      | 95            | positive      | 95            | 3           | Primary              |
| 201603290        | invasive ductal carcinoma  | positive      | 70            | negative      | 0             | 3           | Primary              |
| 201603331        | invasive ductal carcinoma  | positive      | 98            | positive      | 98            | 1           | Primary              |
| 201603332        | invasive ductal carcinoma  | positive      | 99            | positive      | 85            | 0           | Primary              |
| 201603338        | invasive mammary carcinoma | positive      | 98            | positive      | 20            | 2           | Primary              |
| 201603704        | invasive ductal carcinoma  | positive      | 95            | positive      | 90            | 2           | Primary              |
| 201603744        | invasive ductal carcinoma  | positive      | 55            | negative      | 0             | 3           | Primary              |
| 201603818        | invasive lobular carcinoma | positive      | 99            | positive      | 80            | 0           | Primary              |
| 201603820        | invasive ductal carcinoma  | positive      | 99            | positive      | 80            | 0           | Primary              |
| 201604014        | invasive ductal carcinoma  | negative      | 0             | negative      | 0             | 0           | Primary              |
| 201604016        | invasive ductal carcinoma  | positive      | 99            | negative      | 0             | 2           | Primary              |
| 201604102        | invasive ductal carcinoma  | negative      | 0             | negative      | 0             | 3           | Primary              |
| 201604177        | invasive ductal carcinoma  | positive      | 98            | positive      | 70            | 0           | Primary              |
| 201604178        | mucinous carcinoma         | positive      | 99            | positive      | 98            | 0           | Primary              |
| 201604273        | invasive lobular carcinoma | positive      | 98            | positive      | 10            | 1           | Primary              |
| 201604282        | invasive ductal carcinoma  | negative      | 0             | negative      | 0             | 2           | Primary              |
| 201604346        | invasive ductal carcinoma  | positive      | 95            | negative      | 0             | 2           | Primary              |
| 201604347        | invasive ductal carcinoma  | negative      | 0             | negative      | 0             | 3           | Primary              |
| 201604348        | invasive ductal carcinoma  | positive      | 98            | positive      | 90            | 3           | Primary              |
| 201604564        | invasive ductal carcinoma  | positive      | 95            | positive      | 95            | 3           | Primary              |
| 201604743        | mucinous carcinoma         | positive      | 99            | positive      | 90            | 2           | Primary              |
| 201604762        | invasive ductal carcinoma  | positive      | 5             | negative      | 0             | 0           | Primary              |
| 201604788        | invasive ductal carcinoma  | positive      | 80            | positive      | 20            | 0           | Primary              |
| 201604789        | invasive ductal carcinoma  | positive      | 85            | positive      | 10            | 1           | Primary              |
| 201604790        | invasive ductal carcinoma  | negative      | 0             | negative      | 0             | 1           | Primary              |

| Pathology_Number | Diagnosis                        | ER positivity | ER percentage | PR positivity | PR percentage | Her-2 score | Primary or Recurrent |
|------------------|----------------------------------|---------------|---------------|---------------|---------------|-------------|----------------------|
| 201604881        | invasive lobular carcinoma       | positive      | 95            | positive      | 15            | 0           | Primary              |
| 201604883        | invasive ductal carcinoma        | positive      | 70            | positive      | 60            | 3           | Primary              |
| 201605014        | encapsulated papillary carcinoma | positive      | 99            | positive      | 99            | None        | Primary              |
| 201605168        | invasive mammary carcinoma       | positive      | 98            | positive      | 99            | 0           | Primary              |
| 201605377        | invasive ductal carcinoma        | positive      | 99            | negative      | 0             | 2           | Primary              |
| 201605378        | invasive ductal carcinoma        | negative      | 0             | negative      | 0             | 2           | Primary              |
| 201605421        | invasive ductal carcinoma        | positive      | 90            | positive      | 20            | 0           | Primary              |
| 201605422        | invasive ductal carcinoma        | negative      | 0             | negative      | 0             | 3           | Primary              |
| 201605546        | invasive ductal carcinoma        | positive      | 80            | positive      | 10            | 1           | Primary              |
| 201605549        | invasive ductal carcinoma        | negative      | 0             | negative      | 0             | 3           | Primary              |
| 201605550        | invasive ductal carcinoma        | positive      | 99            | positive      | 85            | 2           | Primary              |
| 201605724        | invasive ductal carcinoma        | negative      | 0             | negative      | 0             | 3           | Primary              |
| 201605977        | invasive ductal carcinoma        | positive      | 85            | positive      | 2             | 0           | Primary              |
| 201606080        | invasive ductal carcinoma        | positive      | 99            | positive      | 90            | 0           | Primary              |
| 201606123        | invasive ductal carcinoma        | positive      | 85            | positive      | 95            | 1           | Primary              |
| 201606126        | invasive ductal carcinoma        | negative      | 0             | negative      | 0             | 3           | Recurrent            |
| 201606128        | invasive ductal carcinoma        | positive      | 85            | positive      | 95            | 1           | Primary              |
| 201606150        | invasive ductal carcinoma        | positive      | 60            | positive      | 40            | 3           | Primary              |
| 201606293        | invasive ductal carcinoma        | positive      | 99            | positive      | 15            | 2           | Primary              |
| 201606331        | invasive ductal carcinoma        | positive      | 95            | positive      | 10            | 1           | Primary              |
| 201606758        | invasive ductal carcinoma        | positive      | 99            | positive      | 95            | 2           | Primary              |
| 201606761        | invasive lobular carcinoma       | positive      | 98            | positive      | 98            | 0           | Primary              |
| 201606791        | invasive ductal carcinoma        | positive      | 98            | negative      | 0             | 2           | Primary              |
| 201606802        | invasive ductal carcinoma        | positive      | 98            | positive      | 60            | 3           | Primary              |
| 201606975        | invasive ductal carcinoma        | negative      | 0             | negative      | 0             | 1           | Primary              |
| 201606976        | invasive lobular carcinoma       | positive      | 99            | positive      | 99            | 2           | Primary              |
| 201607039        | invasive lobular carcinoma       | positive      | 95            | positive      | 95            | 1           | Primary              |
| 201607040        | invasive ductal carcinoma        | positive      | 99            | positive      | 20            | 0           | Primary              |
| 201607052        | invasive ductal carcinoma        | positive      | 100           | positive      | 3             | 2           | Primary              |
| 201607136        | invasive ductal carcinoma        | negative      | 0             | negative      | 0             | 3           | Primary              |
| 201607147        | invasive ductal carcinoma        | positive      | 95            | positive      | 20            | 0           | Primary              |
| 201607224        | invasive ductal carcinoma        | positive      | 99            | positive      | 80            | 1           | Primary              |
| 201607316        | encapsulated papillary carcinoma | positive      | 65            | positive      | 20            | None        | Primary              |
| 201607330        | invasive ductal carcinoma        | positive      | 99            | positive      | 98            | 2           | Primary              |
| 201607334        | invasive ductal carcinoma        | positive      | 97            | positive      | 90            | 2           | Primary              |
| 201607335        | invasive ductal carcinoma        | positive      | 98            | positive      | 99            | 2           | Primary              |
| 201607390        | invasive lobular carcinoma       | positive      | 95            | positive      | 20            | 1           | Primary              |

| Pathology_Number | Diagnosis                  | ER positivity | ER percentage | PR positivity | PR percentage | Her-2 score | Primary or Recurrent |
|------------------|----------------------------|---------------|---------------|---------------|---------------|-------------|----------------------|
| 201607401        | invasive ductal carcinoma  | positive      | 90            | positive      | 15            | 2           | Primary              |
| 201607404        | invasive ductal carcinoma  | positive      | 99            | positive      | 10            | 2           | Primary              |
| 201607405        | invasive ductal carcinoma  | positive      | 98            | negative      | 0             | 3           | Primary              |
| 201607465        | invasive ductal carcinoma  | positive      | 98            | positive      | 80            | 0           | Primary              |
| 201607760        | invasive ductal carcinoma  | positive      | 90            | positive      | 98            | 2           | Primary              |
| 201607761        | invasive ductal carcinoma  | positive      | 99            | positive      | 10            | 1           | Primary              |
| 201607854        | invasive ductal carcinoma  | positive      | 98            | positive      | 98            | 0           | Primary              |
| 201607855        | invasive ductal carcinoma  | negative      | 0             | negative      | 0             | 2           | Primary              |
| 201607856        | invasive lobular carcinoma | positive      | 98            | positive      | 80            | 2           | Primary              |
| 201607962        | invasive ductal carcinoma  | negative      | 0             | negative      | 0             | 1           | Primary              |
| 201608040        | invasive ductal carcinoma  | positive      | 5             | negative      | 0             | 3           | Primary              |
| 201608114        | invasive ductal carcinoma  | positive      | 98            | positive      | 80            | 1           | Primary              |
| 201608116        | invasive ductal carcinoma  | positive      | 98            | positive      | 95            | 1           | Primary              |
| 201608119        | invasive ductal carcinoma  | negative      | 0             | negative      | 0             | 2           | Primary              |
| 201608319        | invasive ductal carcinoma  | positive      | 99            | positive      | 85            | 0           | Primary              |
| 201608327        | invasive ductal carcinoma  | positive      | 99            | positive      | 70            | 0           | Primary              |
| 201608328        | invasive ductal carcinoma  | positive      | 95            | negative      | 0             | 2           | Primary              |
| 201608380        | invasive ductal carcinoma  | positive      | 5             | negative      | 0             | 3           | Primary              |
| 201608382        | invasive ductal carcinoma  | positive      | 99            | positive      | 95            | 1           | Primary              |
| 201608519        | invasive ductal carcinoma  | None          | None          | None          | None          | None        | Primary              |
| 201608614        | invasive ductal carcinoma  | positive      | 99            | positive      | 55            | 1           | Primary              |
| 201608616        | invasive lobular carcinoma | positive      | 99            | positive      | 99            | 2           | Primary              |
| 201608618        | invasive ductal carcinoma  | positive      | 99            | negative      | 0             | 2           | Primary              |
| 201608805        | invasive ductal carcinoma  | positive      | 70            | positive      | 30            | 0           | Primary              |
| 201608807        | invasive ductal carcinoma  | positive      | 99            | positive      | 99            | 2           | Primary              |
| 201608829        | metaplastic carcinoma      | negative      | 0             | negative      | 0             | 0           | Primary              |
| 201608844        | invasive ductal carcinoma  | positive      | 90            | positive      | 30            | 1           | Primary              |
| 201608846        | invasive lobular carcinoma | positive      | 80            | positive      | 80            | 1           | Primary              |
| 201608847        | invasive ductal carcinoma  | positive      | 99            | positive      | 20            | 2           | Recurrent            |
| 201609020        | invasive ductal carcinoma  | None          | None          | None          | None          | None        | Primary              |
| 201609030        | invasive ductal carcinoma  | positive      | 98            | negative      | 0             | 2           | Primary              |
| 201609033        | invasive ductal carcinoma  | positive      | 95            | positive      | 70            | 2           | Primary              |
| 201609317        | invasive ductal carcinoma  | negative      | 0             | negative      | 0             | 3           | Primary              |
| 201609487        | invasive ductal carcinoma  | negative      | 0             | negative      | 0             | 1           | Primary              |
| 201609488        | invasive ductal carcinoma  | negative      | 0             | negative      | 0             | 1           | Primary              |
| 201609516        | invasive ductal carcinoma  | negative      | 0             | negative      | 0             | 0           | Primary              |
| 201609517        | invasive ductal carcinoma  | positive      | 99            | positive      | 90            | 1           | Primary              |
| 201609518        | invasive ductal carcinoma  | positive      | 98            | positive      | 98            | 1           | Primary              |

| Pathology_Number | Diagnosis                        | ER positivity | ER percentage | PR positivity | PR percentage | Her-2 score | Primary or Recurrent |
|------------------|----------------------------------|---------------|---------------|---------------|---------------|-------------|----------------------|
| 201609519        | invasive ductal carcinoma        | positive      | 90            | negative      | 0             | 0           | Primary              |
| 201609521        | invasive ductal carcinoma        | positive      | 70            | None          | None          | 3           | Primary              |
| 201609773        | invasive ductal carcinoma        | positive      | 98            | positive      | 30            | 2           | Primary              |
| 201609952        | invasive ductal carcinoma        | positive      | 85            | negative      | 0             | 3           | Primary              |
| 201609999        | invasive ductal carcinoma        | positive      | 95            | positive      | 85            | 1           | Primary              |
| 201610000        | invasive ductal carcinoma        | positive      | 95            | negative      | 0             | 2           | Primary              |
| 201610001        | encapsulated papillary carcinoma | positive      | 95            | positive      | 95            | 0           | Primary              |
| 201610002        | invasive ductal carcinoma        | positive      | 99            | positive      | 99            | 0           | Primary              |
| 201610003        | mucinous carcinoma               | positive      | 99            | positive      | 99            | 0           | Primary              |
| 201610026        | invasive ductal carcinoma        | positive      | 98            | positive      | 98            | 1           | Primary              |
| 201610027        | invasive ductal carcinoma        | positive      | 98            | positive      | 15            | 2           | Primary              |
| 201610030        | invasive ductal carcinoma        | positive      | 95            | positive      | 30            | 2           | Primary              |
| 201610034        | invasive ductal carcinoma        | negative      | 0             | negative      | 0             | 2           | Primary              |
| 201610170        | invasive ductal carcinoma        | negative      | 0             | negative      | 0             | 1           | Primary              |
| 201610236        | invasive ductal carcinoma        | positive      | 95            | negative      | 0             | 0           | Primary              |
| 201610559        | invasive ductal carcinoma        | positive      | 85            | positive      | 90            | 2           | Primary              |
| 201610560        | invasive ductal carcinoma        | positive      | 99            | positive      | 99            | 0           | Primary              |
| 201610565        | invasive ductal carcinoma        | positive      | 99            | positive      | 98            | 2           | Primary              |
| 201610569        | invasive ductal carcinoma        | negative      | 0             | negative      | 0             | 0           | Primary              |
| 201610572        | invasive ductal carcinoma        | positive      | 99            | positive      | 90            | 2           | Primary              |
| 201610627        | invasive ductal carcinoma        | positive      | 70            | negative      | 0             | 3           | Primary              |
| 201610866        | invasive ductal carcinoma        | positive      | 98            | positive      | 95            | 1           | Primary              |
| 201611052        | mucinous carcinoma               | positive      | 90            | positive      | 90            | 2           | Primary              |
| 201611054        | invasive ductal carcinoma        | positive      | 95            | positive      | 12            | 1           | Primary              |
| 201611070        | invasive ductal carcinoma        | negative      | 0             | negative      | 0             | 0           | Primary              |
| 201611138        | invasive ductal carcinoma        | positive      | 99            | positive      | 20            | 1           | Primary              |
| 201611140        | invasive ductal carcinoma        | negative      | 0             | negative      | 0             | 3           | Primary              |
| 201611141        | invasive lobular carcinoma       | positive      | 99            | positive      | 98            | 1           | Primary              |
| 201611282        | invasive ductal carcinoma        | positive      | 99            | positive      | 10            | 1           | Primary              |
| 201611322        | encapsulated papillary carcinoma | positive      | 99            | positive      | 99            | 2           | Primary              |
| 201611324        | invasive ductal carcinoma        | positive      | 98            | positive      | 90            | 0           | Primary              |
| 201611355        | invasive ductal carcinoma        | negative      | 0             | negative      | 0             | 3           | Primary              |
| 201611356        | invasive ductal carcinoma        | positive      | 2             | negative      | 0             | 2           | Primary              |
| 201611358        | invasive ductal carcinoma        | negative      | 0             | negative      | 0             | 3           | Primary              |
| 201611360        | invasive ductal carcinoma        | positive      | 70            | positive      | 10            | 3           | Primary              |
| 201611362        | invasive ductal carcinoma        | positive      | 98            | negative      | 0             | 1           | Primary              |
| 201611465        | invasive ductal carcinoma        | positive      | 98            | positive      | 90            | 0           | Primary              |

| Pathology_Number | Diagnosis                  | ER positivity | ER percentage | PR positivity | PR percentage | Her-2 score | Primary or Recurrent |
|------------------|----------------------------|---------------|---------------|---------------|---------------|-------------|----------------------|
| 201611466        | invasive ductal carcinoma  | negative      | 0             | negative      | 0             | 3           | Primary              |
| 201611540        | invasive ductal carcinoma  | positive      | 80            | positive      | 45            | 3           | Primary              |
| 201611683        | invasive mammary carcinoma | positive      | 99            | positive      | 99            | 2           | Primary              |
| 201611688        | invasive ductal carcinoma  | negative      | 0             | negative      | 0             | 3           | Primary              |
| 201611738        | invasive ductal carcinoma  | positive      | 95            | positive      | 30            | 2           | Primary              |
| 201611739        | invasive ductal carcinoma  | positive      | 99            | positive      | 95            | 2           | Recurrent            |
| 201611740        | invasive ductal carcinoma  | negative      | 0             | negative      | 0             | 2           | Primary              |
| 201611741        | invasive ductal carcinoma  | positive      | 99            | positive      | 99            | 2           | Primary              |
| 201612013        | invasive mammary carcinoma | positive      | 95            | positive      | 80            | 3           | Primary              |
| 201612016        | invasive ductal carcinoma  | positive      | 30            | positive      | 3             | 2           | Primary              |
| 201612197        | invasive ductal carcinoma  | positive      | 98            | positive      | 80            | 3           | Primary              |
| 201612207        | invasive ductal carcinoma  | negative      | 0             | negative      | 0             | 2           | Primary              |
| 201612208        | invasive ductal carcinoma  | positive      | 5             | negative      | 0             | 3           | Primary              |
| 201612211        | invasive ductal carcinoma  | positive      | 98            | positive      | 95            | 2           | Primary              |
| 201612311        | invasive ductal carcinoma  | positive      | 99            | positive      | 99            | 1           | Primary              |
| 201612469        | invasive ductal carcinoma  | positive      | 98            | positive      | 98            | 2           | Primary              |
| 201612471        | invasive ductal carcinoma  | positive      | 99            | negative      | 0             | 2           | Primary              |
| 201612472        | invasive ductal carcinoma  | positive      | 98            | positive      | 30            | 2           | Primary              |
| 201612478        | invasive mammary carcinoma | positive      | 80            | positive      | 70            | 1           | Primary              |
| 201612491        | invasive lobular carcinoma | positive      | 99            | positive      | 99            | 2           | Primary              |
| 201612697        | invasive ductal carcinoma  | positive      | 70            | positive      | 95            | 1           | Primary              |
| 201612885        | invasive ductal carcinoma  | positive      | 99            | positive      | 99            | 1           | Primary              |
| 201612886        | invasive ductal carcinoma  | positive      | 10            | positive      | 2             | 1           | Primary              |
| 201612887        | invasive ductal carcinoma  | positive      | 99            | positive      | 30            | 2           | Primary              |
| 201612924        | invasive ductal carcinoma  | positive      | 99            | positive      | 70            | 0           | Primary              |
| 201612925        | invasive ductal carcinoma  | negative      | 0             | negative      | 0             | 1           | Primary              |
| 201613092        | invasive ductal carcinoma  | positive      | 99            | negative      | 0             | 2           | Primary              |
| 201613093        | invasive ductal carcinoma  | positive      | 98            | positive      | 65            | 1           | Primary              |
| 201613204        | invasive ductal carcinoma  | positive      | 10            | negative      | 0             | 2           | Primary              |
| 201613209        | invasive mammary carcinoma | negative      | 0             | negative      | 0             | 3           | Primary              |
| 201613249        | invasive ductal carcinoma  | positive      | 40            | negative      | 0             | 3           | Primary              |
| 201613263        | invasive ductal carcinoma  | positive      | 60            | positive      | 20            | 3           | Primary              |
| 201613397        | invasive ductal carcinoma  | negative      | 0             | negative      | 0             | 3           | Primary              |
| 201613405        | invasive ductal carcinoma  | positive      | 99            | positive      | 50            | 2           | Primary              |
| 201613499        | invasive lobular carcinoma | positive      | 60            | negative      | 0             | 2           | Primary              |
| 201613511        | invasive ductal carcinoma  | positive      | 98            | negative      | 0             | 3           | Primary              |
| 201613571        | invasive ductal carcinoma  | positive      | 99            | negative      | 0             | 3           | Primary              |
| 201613779        | mucinous carcinoma         | positive      | 99            | positive      | 90            | 1           | Primary              |

| Pathology_Number | Diagnosis                 | ER positivity | ER percentage | PR positivity | PR percentage | Her-2 score | Primary or Recurrent |
|------------------|---------------------------|---------------|---------------|---------------|---------------|-------------|----------------------|
| 201613780        | invasive ductal carcinoma | None          | None          | positive      | 99            | 1           | Primary              |
| 201613789        | invasive ductal carcinoma | negative      | 0             | negative      | 0             | 2           | Primary              |
| 201613792        | invasive ductal carcinoma | positive      | 60            | negative      | 0             | 2           | Primary              |
| 201613805        | invasive ductal carcinoma | positive      | 2             | negative      | 0             | 2           | Primary              |
| 201614042        | invasive ductal carcinoma | positive      | 99            | positive      | 99            | 2           | Primary              |
| 201614045        | invasive ductal carcinoma | positive      | 99            | negative      | 0             | 3           | Primary              |
| 201614245        | invasive ductal carcinoma | positive      | 99            | positive      | 95            | 2           | Primary              |
| 201614247        | invasive ductal carcinoma | negative      | 0             | negative      | 0             | 3           | Primary              |
| 201614283        | invasive ductal carcinoma | positive      | 99            | negative      | 0             | 2           | Primary              |
| 201614289        | invasive ductal carcinoma | positive      |               | positive      | 35            | 2           | Primary              |
| 201614356        | invasive ductal carcinoma | positive      | 99            | positive      | 99            | 1           | Primary              |
| 201614484        | invasive ductal carcinoma | negative      | 0             | negative      | 0             | 3           | Primary              |
| 201614569        | invasive ductal carcinoma | positive      | 99            | negative      | 0             | 0           | Primary              |
| 201614581        | invasive ductal carcinoma | positive      | 98            | negative      | 0             | 2           | Primary              |
| 201614701        | invasive ductal carcinoma | negative      | 0             | negative      | 0             | 2           | Primary              |
| 201614702        | invasive ductal carcinoma | negative      | 0             | negative      | 0             | 3           | Primary              |
| 201614710        | invasive ductal carcinoma | positive      | 90            | positive      | 2             | 2           | Primary              |
| 201614766        | invasive ductal carcinoma | positive      | 99            | negative      | 0             | 2           | Primary              |
| 201614767        | invasive ductal carcinoma | positive      | 90            | positive      | 80            | 2           | Primary              |
| 201614935        | invasive ductal carcinoma | positive      | 99            | negative      | 0             | 0           | Primary              |
| 201615004        | invasive ductal carcinoma | negative      | 0             | negative      | 0             | 3           | Primary              |
| 201615143        | invasive ductal carcinoma | positive      | 55            | positive      | 40            | 2           | Primary              |
| 201615278        | invasive ductal carcinoma | negative      | 0             | positive      | -1            | 3           | Primary              |
| 201615323        | mucinous carcinoma        | positive      | 99            | negative      | 0             | 2           | Primary              |
| 201615325        | invasive ductal carcinoma | positive      | 90            | positive      | 55            | 1           | Primary              |
| 201615327        | invasive ductal carcinoma | positive      | 99            | positive      | 15            | 1           | Primary              |
| 201615328        | invasive ductal carcinoma | negative      | 0             | negative      | 0             | 1           | Primary              |
| 201615547        | invasive ductal carcinoma | positive      | 98            | positive      | 98            | 2           | Primary              |
| 201615577        | invasive ductal carcinoma | negative      | 0             | negative      | 0             | 3           | Primary              |
| 201615636        | invasive ductal carcinoma | negative      | 0             | negative      | 0             | 0           | Primary              |
| 201615715        | invasive ductal carcinoma | positive      | 97            | positive      | 2             | 1           | Primary              |
| 201615718        | invasive ductal carcinoma | positive      | 99            | positive      | 40            | 2           | Primary              |
| 201615814        | invasive ductal carcinoma | positive      | 99            | positive      | 99            | 0           | Primary              |
| 201615816        | invasive ductal carcinoma | negative      | 0             | negative      | 0             | 3           | Primary              |
| 201615844        | mucinous carcinoma        | positive      | 99            | positive      | 99            | 1           | Primary              |
| 201615845        | invasive ductal carcinoma | positive      | 99            | negative      | 0             | 1           | Primary              |
| 201615846        | invasive ductal carcinoma | negative      | 0             | negative      | 0             | 3           | Recurrent            |
| 201616035        | invasive ductal carcinoma | positive      | 99            | negative      | 0             | 1           | Primary              |

| Pathology_Number | Diagnosis                        | ER positivity | ER percentage | PR positivity | PR percentage | Her-2 score | Primary or Recurrent |
|------------------|----------------------------------|---------------|---------------|---------------|---------------|-------------|----------------------|
| 201616037        | invasive ductal carcinoma        | positive      | 98            | positive      | 85            | 2           | Primary              |
| 201616108        | invasive ductal carcinoma        | positive      | 80            | positive      | 10            | 2           | Primary              |
| 201616114        | invasive ductal carcinoma        | positive      | 15            | negative      | 0             | 0           | Primary              |
| 201616122        | invasive ductal carcinoma        | positive      | 99            | positive      | 99            | 1           | Primary              |
| 201616301        | invasive ductal carcinoma        | positive      | 90            | positive      | 20            | 3           | Primary              |
| 201616304        | invasive mammary carcinoma       | positive      | 99            | positive      | 5             | 1           | Primary              |
| 201616517        | invasive ductal carcinoma        | negative      | 0             | negative      | 0             | 1           | Primary              |
| 201616518        | encapsulated papillary carcinoma | positive      | 99            | positive      | 45            | None        | Primary              |
| 201616521        | invasive ductal carcinoma        | negative      | 0             | negative      | 0             | 2           | Primary              |
| 201616522        | invasive ductal carcinoma        | positive      | 5             | negative      | 0             | 2           | Primary              |
| 201616560        | invasive ductal carcinoma        | positive      | 99            | positive      | 10            | 2           | Primary              |
| 201616615        | invasive ductal carcinoma        | positive      | 98            | positive      | 90            | 2           | Primary              |
| 201616616        | invasive ductal carcinoma        | positive      | 98            | positive      | 160           | 2           | Primary              |
| 201616733        | invasive mammary carcinoma       | positive      | 99            | positive      | 65            | 1           | Primary              |
| 201616734        | invasive ductal carcinoma        | positive      | 2             | negative      | 0             | 3           | Primary              |
| 201616780        | invasive ductal carcinoma        | positive      | 98            | positive      |               | 1           | Primary              |
| 201616967        | invasive ductal carcinoma        | positive      | 99            | positive      | 35            | 2           | Primary              |
| 201616993        | invasive ductal carcinoma        | positive      | 99            | negative      | 0             | 2           | Primary              |
| 201617266        | invasive ductal carcinoma        | negative      | 0             | negative      | 0             | 1           | Primary              |
| 201617294        | mucinous carcinoma               | positive      | 95            | positive      | 90            | 0           | Primary              |
| 201617314        | invasive ductal carcinoma        | positive      | 98            | positive      | 90            | 0           | Primary              |
| 201617407        | invasive ductal carcinoma        | positive      | 98            | positive      | 90            | 1           | Primary              |
| 201617408        | invasive ductal carcinoma        | positive      | 98            | positive      | 85            | 1           | Primary              |
| 201617610        | invasive ductal carcinoma        | negative      | 0             | negative      | 0             | 0           | Primary              |
| 201617649        | invasive ductal carcinoma        | positive      | 99            | positive      | 40            | 1           | Primary              |
| 201617650        | invasive ductal carcinoma        | positive      | 99            | positive      | 85            | 1           | Primary              |
| 201617651        | invasive ductal carcinoma        | negative      | 0             | negative      | 0             | 0           | Primary              |
| 201617652        | invasive ductal carcinoma        | negative      | 0             | negative      | 0             | 3           | Primary              |
| 201617765        | invasive ductal carcinoma        | positive      | 35            | negative      | 0             | 3           | Primary              |
| 201617766        | invasive ductal carcinoma        | positive      | 65            | positive      | 15            | 2           | Primary              |
| 201617860        | invasive ductal carcinoma        | positive      | 99            | positive      | 20            | 0           | Primary              |
| 201617862        | invasive ductal carcinoma        | positive      | 99            | positive      | 98            | 0           | Primary              |
| 201617863        | invasive ductal carcinoma        | negative      | 0             | negative      | 0             | 0           | Primary              |
| 201618002        | invasive ductal carcinoma        | positive      | 90            | positive      | 1             | 2           | Primary              |
| 201618003        | mucinous carcinoma               | positive      | 99            | positive      | 85            | 0           | Primary              |
| 201618061        | invasive ductal carcinoma        | positive      | 80            | positive      | 60            | 0           | Primary              |
| 201618348        | invasive ductal carcinoma        | positive      | 98            | positive      | 95            | 0           | Primary              |



| Pathology_Number | Diagnosis                  | ER positivity | ER percentage | PR positivity | PR percentage | Her-2 score | Primary or Recurrent |
|------------------|----------------------------|---------------|---------------|---------------|---------------|-------------|----------------------|
| 201618349        | invasive ductal carcinoma  | positive      | 98            | positive      | 30            | 0           | Primary              |
| 201618356        | invasive ductal carcinoma  | positive      | 99            | positive      | 10            | 3           | Primary              |
| 201618516        | invasive mammary carcinoma | positive      | 40            | positive      | 15            | 1           | Primary              |
| 201618518        | mucinous carcinoma         | positive      | 95            | positive      | 10            | 2           | Primary              |
| 201618521        | invasive ductal carcinoma  | positive      | 90            | negative      | 0             | 3           | Primary              |
| 201618679        | invasive ductal carcinoma  | positive      | 98            | positive      | 60            | 2           | Primary              |
| 201618681        | invasive ductal carcinoma  | positive      | 98            | positive      | 55            | 2           | Primary              |
| 201618766        | invasive ductal carcinoma  | positive      | 10            | positive      | 10            | 2           | Primary              |
| 201618803        | invasive ductal carcinoma  | positive      | 99            | positive      | 80            | 0           | Primary              |
| 201618919        | invasive ductal carcinoma  | positive      | 20            | negative      | 0             | 3           | Primary              |
| 201618921        | invasive mammary carcinoma | negative      | 0             | negative      | 0             | 1           | Primary              |
| 201619034        | invasive ductal carcinoma  | positive      | 98            | negative      | 0             | 1           | Primary              |
| 201619425        | invasive ductal carcinoma  | negative      | 0             | negative      | 0             | 0           | Primary              |
| 201619426        | invasive ductal carcinoma  | positive      |               | positive      |               | 0           | Primary              |
| 201619431        | invasive ductal carcinoma  | positive      | 99            | positive      | 80            | 0           | Primary              |
| 201619641        | invasive lobular carcinoma | positive      | 98            | positive      | 98            | 1           | Primary              |
| 201619671        | invasive mammary carcinoma | negative      | 0             | negative      | 0             | 3           | Primary              |
| 201619854        | invasive ductal carcinoma  | positive      | 99            | positive      | 30            | 0           | Primary              |
| 201619945        | invasive ductal carcinoma  | positive      | 95            | positive      | 85            | 0           | Primary              |
| 201619946        | invasive ductal carcinoma  | positive      | 99            | positive      | 99            | 0           | Primary              |
| 201620080        | invasive ductal carcinoma  | positive      | 99            | positive      | 99            | 2           | Primary              |
| 201620081        | invasive ductal carcinoma  | positive      | 98            | positive      | 97            | 1           | Primary              |
| 201620104        | invasive ductal carcinoma  | None          | None          | None          | None          | None        | Primary              |
| 201620181        | metaplastic carcinoma      | negative      | 0             | negative      | 0             | 0           | Primary              |
| 201620210        | invasive ductal carcinoma  | positive      | 99            | negative      | 0             | 0           | Primary              |
| 201620216        | invasive lobular carcinoma | positive      | 99            | negative      | 0             | 1           | Primary              |
| 201620307        | invasive ductal carcinoma  | positive      | 10            | negative      | 0             | 2           | Primary              |
| 201620381        | invasive ductal carcinoma  | positive      | 99            | positive      | 5             | 0           | Primary              |
| 201620382        | invasive ductal carcinoma  | positive      | 95            | negative      | 0             | 1           | Primary              |
| 201620535        | invasive ductal carcinoma  | positive      | 60            | positive      | 45            | 2           | Primary              |
| 201620536        | invasive ductal carcinoma  | positive      | 99            | positive      | 1             | 2           | Primary              |
| 201620537        | invasive ductal carcinoma  | positive      | 99            | positive      | 65            | 0           | Primary              |
| 201620542        | invasive ductal carcinoma  | negative      | 0             | negative      | 0             | 1           | Primary              |
| 201620629        | invasive ductal carcinoma  | positive      | 99            | positive      | 1             | 0           | Primary              |
| 201620636        | invasive ductal carcinoma  | negative      | 0             | negative      | 0             | 3           | Primary              |
| 201620836        | invasive ductal carcinoma  | negative      | 0             | negative      | 0             | 3           | Primary              |
| 201620840        | invasive ductal carcinoma  | positive      | 99            | positive      | 55            | 2           | Primary              |
| 201620842        | invasive lobular carcinoma | positive      | 98            | positive      | 98            | 1           | Primary              |

| Pathology_Number | Diagnosis                 | ER positivity | ER percentage | PR positivity | PR percentage | Her-2 score | Primary or Recurrent |
|------------------|---------------------------|---------------|---------------|---------------|---------------|-------------|----------------------|
| 201621011        | invasive ductal carcinoma | positive      | 98            | positive      | 2             | 0           | Primary              |
| 201621051        | invasive ductal carcinoma | positive      | 99            | positive      | 99            | 0           | Primary              |
| 201621124        | invasive ductal carcinoma | negative      | 0             | negative      | 0             | 0           | Primary              |
| 201621125        | invasive ductal carcinoma | positive      | 98            | positive      | 60            | 0           | Primary              |
| 201621131        | invasive ductal carcinoma | None          | None          | None          | None          | None        | Primary              |
| 201621240        | invasive ductal carcinoma | positive      | 98            | positive      | 98            | 2           | Primary              |
| 201621244        | invasive ductal carcinoma | negative      | 0             | negative      | 0             | 2           | Primary              |
| 201621290        | invasive ductal carcinoma | positive      | 99            | positive      | 15            | 0           | Primary              |
| 201621435        | invasive ductal carcinoma | positive      | 99            | positive      | 40            | 0           | Primary              |
| 201621436        | invasive ductal carcinoma | positive      | 98            | positive      | 10            | 0           | Primary              |
| 201621438        | invasive ductal carcinoma | positive      | 99            | positive      | 55            | 2           | Primary              |
| 201621442        | invasive ductal carcinoma | negative      | 0             | negative      | 0             | 3           | Primary              |
| 201621480        | invasive ductal carcinoma | positive      | 99            | positive      | 99            | 0           | Primary              |
| 201621537        | invasive ductal carcinoma | positive      | 99            | positive      | 30            | 0           | Primary              |
| 201621666        | invasive ductal carcinoma | positive      | 40            | positive      | 15            | 2           | Primary              |
| 201621751        | invasive ductal carcinoma | positive      | 98            | positive      | 99            | 1           | Primary              |
| 201621878        | invasive ductal carcinoma | positive      | 90            | negative      | 0             | 0           | Primary              |
| 201621879        | invasive ductal carcinoma | positive      | 95            | positive      | 70            | 0           | Primary              |
| 201622026        | invasive ductal carcinoma | positive      | 99            | positive      | 2             | 0           | Primary              |
| 201622027        | mucinous carcinoma        | positive      | 90            | positive      | 5             | 3           | Primary              |
| 201622029        | invasive ductal carcinoma | positive      | 99            | positive      | 80            | 1           | Primary              |
| 201622192        | invasive ductal carcinoma | positive      | 99            | positive      | 20            | 1           | Primary              |
| 201622194        | mucinous carcinoma        | positive      | 98            | positive      | 2             | 1           | Primary              |
| 201622229        | invasive ductal carcinoma | positive      |               | positive      |               | 0           | Primary              |
| 201622231        | invasive ductal carcinoma | positive      | 45            | negative      | 0             | 3           | Primary              |
| 201622244        | invasive ductal carcinoma | positive      |               | positive      |               | 0           | Primary              |
| 201622293        | invasive ductal carcinoma | positive      | 99            | positive      | 15            | 0           | Primary              |
| 201622436        | invasive ductal carcinoma | positive      | 80            | positive      | 99            | 1           | Primary              |
| 201622633        | invasive ductal carcinoma | positive      | 95            | positive      | 15            | 2           | Primary              |
| 201622950        | invasive ductal carcinoma | positive      | 99            | positive      | 90            | 0           | Primary              |
| 201622956        | invasive ductal carcinoma | positive      | 99            | positive      | 99            | 1           | Primary              |
| 201623190        | invasive ductal carcinoma | positive      | 85            | positive      | 20            | 0           | Primary              |
| 201623369        | invasive ductal carcinoma | negative      | 0             | negative      | 0             | 2           | Primary              |
| 201623416        | invasive ductal carcinoma | positive      | 100           | positive      | 2             | 2           | Primary              |
| 201623574        | invasive ductal carcinoma | positive      | 99            | negative      | 0             | 2           | Primary              |
| 201623575        | invasive ductal carcinoma | negative      | 0             | negative      | 0             | 1           | Primary              |
| 201623579        | invasive ductal carcinoma | negative      | 0             | negative      | 0             | 3           | Primary              |
| 201623965        | invasive ductal carcinoma | negative      | 0             | negative      | 0             | 3           | Primary              |

| Pathology_Number | Diagnosis                        | ER positivity | ER percentage | PR positivity | PR percentage | Her-2 score | Primary or Recurrent |
|------------------|----------------------------------|---------------|---------------|---------------|---------------|-------------|----------------------|
| 201623966        | invasive ductal carcinoma        | negative      | 0             | negative      | 0             | 0           | Primary              |
| 201623967        | invasive ductal carcinoma        | positive      | 15            | positive      | 1             | 2           | Primary              |
| 201624123        | invasive ductal carcinoma        | positive      | -1            | positive      | 99            | 1           | Primary              |
| 201624293        | invasive ductal carcinoma        | positive      | 98            | positive      | 85            | 1           | Primary              |
| 201624397        | invasive ductal carcinoma        | negative      | 0             | negative      | 0             | 0           | Primary              |
| 201624398        | invasive ductal carcinoma        | negative      | 0             | negative      | 0             | 1           | Primary              |
| 201624399        | invasive ductal carcinoma        | positive      | 99            | positive      | 99            | 0           | Primary              |
| 201624401        | invasive ductal carcinoma        | positive      | 99            | positive      | 90            | 0           | Primary              |
| 201624710        | encapsulated papillary carcinoma | positive      | 99            | positive      | 65            | 0           | Primary              |
| 201624714        | invasive mammary carcinoma       | negative      | 0             | negative      | 0             | 0           | Primary              |
| 201624718        | invasive ductal carcinoma        | positive      | 80            | positive      | 55            | 2           | Primary              |
| 201624762        | invasive ductal carcinoma        | positive      | 99            | negative      | 0             | 1           | Primary              |
| 201624815        | invasive ductal carcinoma        | positive      | 60            | negative      | 0             | 2           | Primary              |
| 201624816        | invasive ductal carcinoma        | negative      | 0             | negative      | 0             | 0           | Primary              |
| 201624817        | invasive ductal carcinoma        | positive      | 99            | negative      | 0             | 1           | Primary              |
| 201624926        | invasive ductal carcinoma        | positive      | 99            | positive      | 98            | 0           | Primary              |
| 201625016        | invasive ductal carcinoma        | positive      | 98            | positive      | 98            | 0           | Primary              |
| 201625070        | invasive ductal carcinoma        | positive      | 95            | positive      | 99            | 0           | Primary              |
| 201625106        | invasive ductal carcinoma        | positive      | 85            | positive      | 70            | 0           | Primary              |
| 201625242        | invasive ductal carcinoma        | negative      | 0             | negative      | 0             | 3           | Primary              |
| 201625490        | mucinous carcinoma               | positive      | 99            | positive      | 20            | 2           | Primary              |
| 201625491        | invasive ductal carcinoma        | negative      | 0             | negative      | 0             | 3           | Primary              |
| 201625708        | invasive ductal carcinoma        | positive      | 99            | positive      | 99            | 1           | Primary              |
| 201625711        | invasive ductal carcinoma        | positive      | 99            | positive      | 99            | 0           | Primary              |
| 201625817        | invasive ductal carcinoma        | positive      | 90            | negative      | 0             | 2           | Primary              |
| 201625984        | invasive ductal carcinoma        | positive      | 99            | positive      | 70            | 0           | Primary              |
| 201625997        | invasive lobular carcinoma       | positive      | 95            | positive      | 98            | 0           | Primary              |
| 201626026        | invasive ductal carcinoma        | negative      | 0             | negative      | 0             | 0           | Primary              |
| 201626027        | invasive ductal carcinoma        | positive      | 85            | positive      | 70            | 0           | Recurrent            |
| 201626031        | invasive ductal carcinoma        | negative      | 0             | positive      | 30            | 1           | Primary              |
| 201626038        | invasive ductal carcinoma        | positive      | 99            | positive      | 15            | 2           | Primary              |
| 201626270        | invasive ductal carcinoma        | negative      | 0             | negative      | 0             | 3           | Primary              |
| 201626297        | invasive ductal carcinoma        | positive      | 95            | positive      | 70            | 0           | Primary              |
| 201626498        | invasive ductal carcinoma        | positive      | 90            | positive      | 80            | 0           | Primary              |
| 201626500        | invasive ductal carcinoma        | positive      | 95            | positive      | 5             | 0           | Primary              |
| 201626708        | invasive ductal carcinoma        | positive      | 98            | positive      | 10            | 2           | Primary              |
| 201626711        | invasive ductal carcinoma        | None          | None          | None          | None          | 0           | Primary              |

| Pathology_Number | Diagnosis                        | ER positivity | ER percentage | PR positivity | PR percentage | Her-2 score | Primary or Recurrent |
|------------------|----------------------------------|---------------|---------------|---------------|---------------|-------------|----------------------|
| 201626716        | invasive ductal carcinoma        | positive      | 60            | positive      | 20            | 3           | Primary              |
| 201626717        | invasive ductal carcinoma        | positive      | 99            | negative      | 0             | 1           | Primary              |
| 201626825        | invasive ductal carcinoma        | positive      | 95            | positive      | 10            | 0           | Primary              |
| 201626826        | mucinous carcinoma               | positive      | 55            | positive      | 1             | 3           | Primary              |
| 201626827        | invasive ductal carcinoma        | positive      | 99            | positive      | 99            | 1           | Primary              |
| 201626828        | invasive ductal carcinoma        | positive      | 99            | positive      | 99            | 1           | Primary              |
| 201626829        | invasive ductal carcinoma        | positive      | 95            | negative      | 0             | 3           | Primary              |
| 201627001        | invasive ductal carcinoma        | positive      | 99            | positive      | 99            | 0           | Primary              |
| 201627003        | invasive ductal carcinoma        | positive      | 99            | positive      | 99            | 2           | Primary              |
| 201627004        | invasive ductal carcinoma        | positive      | 55            | positive      | 10            | 2           | Primary              |
| 201627185        | invasive ductal carcinoma        | positive      | 99            | positive      | 70            | 0           | Primary              |
| 201627377        | invasive ductal carcinoma        | negative      | 0             | negative      | 0             | 2           | Primary              |
| 201627384        | invasive ductal carcinoma        | positive      | 99            | positive      | 95            | 0           | Primary              |
| 201627385        | invasive ductal carcinoma        | negative      | 0             | negative      | 0             | 0           | Primary              |
| 201627386        | invasive ductal carcinoma        | positive      | 99            | positive      | 20            | 1           | Primary              |
| 201627398        | invasive ductal carcinoma        | positive      | 99            | positive      | 1             | 0           | Primary              |
| 201627669        | invasive ductal carcinoma        | positive      | 99            | positive      | 55            | 1           | Primary              |
| 201627671        | invasive ductal carcinoma        | positive      | 95            | positive      | 45            | 2           | Primary              |
| 201627865        | invasive ductal carcinoma        | positive      | 99            | positive      | 1             | 3           | Primary              |
| 201627892        | invasive ductal carcinoma        | positive      | 5             | positive      | 10            | 1           | Primary              |
| 201627969        | invasive ductal carcinoma        | positive      | 99            | positive      | 70            | 1           | Primary              |
| 201628110        | invasive ductal carcinoma        | None          | None          | None          | None          | None        | Primary              |
| 201628198        | invasive ductal carcinoma        | positive      | 90            | positive      | 90            | 2           | Primary              |
| 201628199        | invasive ductal carcinoma        | positive      | 99            | positive      | 95            | 2           | Primary              |
| 201628200        | invasive ductal carcinoma        | positive      | 99            | positive      | 65            | 2           | Primary              |
| 201628201        | metaplastic carcinoma            | negative      | 0             | negative      | 0             | 0           | Primary              |
| 201628287        | invasive ductal carcinoma        | positive      | 22            | negative      | 0             | 3           | Primary              |
| 201628288        | invasive ductal carcinoma        | positive      | 95            | positive      | 95            | 0           | Primary              |
| 201628289        | invasive ductal carcinoma        | negative      | 0             | negative      | 0             | 0           | Primary              |
| 201628336        | invasive ductal carcinoma        | positive      | 60            | positive      | 30            | 2           | Recurrent            |
| 201628416        | encapsulated papillary carcinoma | positive      | 95            | positive      | 35            | 2           | Primary              |
| 201628417        | metaplastic carcinoma            | negative      | 0             | negative      | 0             | 0           | Primary              |
| 201628568        | invasive ductal carcinoma        | positive      | 5             | negative      | 0             | 3           | Primary              |
| 201628570        | invasive ductal carcinoma        | positive      | 80            | positive      | 99            | 1           | Primary              |
| 201628599        | invasive ductal carcinoma        | negative      | 0             | positive      | 95            | 0           | Primary              |
| 201628850        | invasive ductal carcinoma        | positive      | 98            | positive      | 35            | 1           | Primary              |
| 201629065        | invasive ductal carcinoma        | positive      | 99            | positive      | 90            | 2           | Primary              |

| Pathology_Number | Diagnosis                        | ER positivity | ER percentage | PR positivity | PR percentage | Her-2 score | Primary or Recurrent |
|------------------|----------------------------------|---------------|---------------|---------------|---------------|-------------|----------------------|
| 201629071        | invasive ductal carcinoma        | positive      | 95            | positive      | 20            | 2           | Primary              |
| 201629182        | invasive ductal carcinoma        | positive      | 99            | positive      | 99            | 2           | Primary              |
| 201629304        | mucinous carcinoma               | positive      | 99            | positive      | 60            | 1           | Primary              |
| 201629305        | invasive ductal carcinoma        | positive      | 90            | positive      | 99            | 2           | Primary              |
| 201629520        | invasive ductal carcinoma        | negative      | 0             | negative      | 0             | 3           | Primary              |
| 201629546        | invasive ductal carcinoma        | positive      | 99            | positive      | 1             | 1           | Primary              |
| 201629628        | invasive ductal carcinoma        | positive      | 99            | positive      | 70            | 1           | Primary              |
| 201629629        | mucinous carcinoma               | positive      | 99            | positive      | 55            | 0           | Primary              |
| 201629798        | invasive ductal carcinoma        | negative      | 0             | negative      | 0             | 3           | Primary              |
| 201629802        | invasive ductal carcinoma        | positive      | 95            | positive      | 10            | 1           | Primary              |
| 201630116        | invasive ductal carcinoma        | positive      | 98            | positive      | 99            | 0           | Primary              |
| 201630124        | invasive mammary carcinoma       | positive      | 99            | positive      | 99            | 1           | Primary              |
| 201630334        | encapsulated papillary carcinoma | positive      | 99            | positive      | 85            | None        | Primary              |
| 201630336        | invasive ductal carcinoma        | positive      | 99            | positive      | 5             | 1           | Primary              |
| 201630369        | invasive ductal carcinoma        | positive      | 2             | negative      | 0             | 0           | Primary              |
| 201630433        | invasive ductal carcinoma        | positive      | 99            | positive      | 99            | 2           | Primary              |
| 201630640        | mucinous carcinoma               | positive      | 99            | positive      | 99            | 2           | Primary              |
| 201630756        | invasive ductal carcinoma        | positive      | 30            | negative      | 0             | 3           | Primary              |
| 201630761        | invasive ductal carcinoma        | positive      | 98            | positive      | 99            | 0           | Primary              |
| 201630762        | invasive ductal carcinoma        | positive      | 70            | positive      | 99            | 0           | Primary              |
| 201630848        | invasive ductal carcinoma        | positive      | 99            | positive      | 99            | 0           | Primary              |
| 201630876        | invasive ductal carcinoma        | negative      | 0             | negative      | 0             | 3           | Primary              |
| 201631106        | invasive ductal carcinoma        | positive      | 99            | positive      | 2             | 0           | Primary              |
| 201631109        | invasive ductal carcinoma        | positive      | 99            | positive      | 2             | 2           | Primary              |
| 201631337        | invasive ductal carcinoma        | positive      | 99            | negative      | 0             | 1           | Primary              |
| 201631338        | invasive ductal carcinoma        | negative      | 0             | negative      | 0             | 2           | Primary              |
| 201631378        | invasive ductal carcinoma        | positive      | 99            | negative      | 0             | 2           | Primary              |
| 201631545        | invasive ductal carcinoma        | positive      | 99            | positive      | 45            | 2           | Primary              |
| 201631547        | invasive ductal carcinoma        | negative      | 0             | negative      | 0             | 2           | Primary              |
| 201631550        | invasive ductal carcinoma        | negative      | 0             | negative      | 0             | 2           | Primary              |
| 201631609        | invasive ductal carcinoma        | negative      | 0             | negative      | 0             | 2           | Primary              |
| 201631794        | invasive ductal carcinoma        | positive      | 99            | positive      | 99            | 1           | Primary              |
| 201631899        | invasive ductal carcinoma        | positive      | 99            | positive      | 99            | 2           | Primary              |
| 201631998        | invasive ductal carcinoma        | positive      | -1            | positive      | 10            | 2           | Primary              |
| 201632001        | invasive ductal carcinoma        | positive      | 85            | positive      | 5             | 0           | Primary              |
| 201632102        | invasive ductal carcinoma        | negative      | 0             | negative      | 0             | 0           | Primary              |
| 201632105        | invasive ductal carcinoma        | positive      | 90            | positive      | 80            | 1           | Primary              |

| Pathology_Number | Diagnosis                         | ER positivity | ER percentage | PR positivity | PR percentage | Her-2 score | Primary or Recurrent |
|------------------|-----------------------------------|---------------|---------------|---------------|---------------|-------------|----------------------|
| 201632265        | invasive ductal carcinoma         | negative      | 0             | negative      | 0             | 3           | Primary              |
| 201632568        | invasive ductal carcinoma         | positive      | 95            | positive      | 98            | 0           | Primary              |
| 201632569        | mucinous carcinoma                | positive      | 99            | positive      | 20            | 0           | Primary              |
| 201632572        | invasive ductal carcinoma         | negative      | 0             | negative      | 0             | 3           | Primary              |
| 201632741        | invasive ductal carcinoma         | positive      | 60            | negative      | 0             | 2           | Primary              |
| 201632742        | invasive ductal carcinoma         | positive      | 70            | positive      | 45            | 3           | Primary              |
| 201632743        | invasive lobular carcinoma        | positive      | 98            | positive      | 40            | 0           | Primary              |
| 201632744        | invasive ductal carcinoma         | positive      | 90            | positive      | 95            | 2           | Primary              |
| 201633004        | invasive ductal carcinoma         | positive      | 99            | positive      | 97            | 1           | Primary              |
| 201633103        | invasive ductal carcinoma         | negative      | 0             | negative      | 0             | 3           | Primary              |
| 201633104        | invasive ductal carcinoma         | positive      | 99            | positive      | 99            | 2           | Primary              |
| 201633208        | invasive ductal carcinoma         | positive      | 99            | positive      | 95            | 0           | Primary              |
| 201633262        | invasive ductal carcinoma         | positive      | 95            | positive      | 99            | 0           | Primary              |
| 201633498        | invasive ductal carcinoma         | negative      | 0             | negative      | 0             | 1           | Primary              |
| 201633732        | invasive ductal carcinoma         | negative      | 0             | negative      | 0             | 0           | Primary              |
| 201633801        | invasive ductal carcinoma         | negative      | 0             | negative      | 0             | 0           | Primary              |
| 201634062        | invasive ductal carcinoma         | positive      | 3             | negative      | 0             | 3           | Primary              |
| 201634063        | invasive lobular carcinoma        | positive      | 95            | positive      | 15            | 0           | Primary              |
| 201634177        | invasive ductal carcinoma         | positive      | 99            | positive      | 95            | 2           | Primary              |
| 201634276        | invasive ductal carcinoma         | positive      | 99            | positive      | 99            | 0           | Primary              |
| 201634387        | invasive ductal carcinoma         | negative      | 0             | negative      | 0             | 3           | Primary              |
| 201634388        | invasive lobular carcinoma        | positive      | 99            | positive      | 65            | 1           | Primary              |
| 201634391        | invasive ductal carcinoma         | positive      | 99            | positive      | 20            | 2           | Primary              |
| 201634392        | invasive ductal carcinoma         | negative      | 0             | negative      | 0             | 0           | Primary              |
| 201634393        | invasive ductal carcinoma         | negative      | 0             | negative      | 0             | 0           | Primary              |
| 201634394        | invasive ductal carcinoma         | positive      | 99            | positive      | 30            | 2           | Primary              |
| 201634480        | invasive ductal carcinoma         | positive      | 95            | positive      | 95            | 0           | Primary              |
| 201634481        | invasive ductal carcinoma         | positive      | 98            | positive      | 10            | 2           | Primary              |
| 201634482        | invasive ductal carcinoma         | positive      | 98            | positive      | 98            | 0           | Primary              |
| 201634756        | invasive ductal carcinoma         | positive      | 95            | negative      | 0             | 1           | Primary              |
| 201634758        | invasive ductal carcinoma         | positive      | 99            | positive      | 30            | 1           | Primary              |
| 201634760        | invasive micropapillary carcinoma | positive      | 99            | positive      | 85            | 2           | Primary              |
| 201634967        | invasive ductal carcinoma         | positive      | 98            | positive      | 98            | 1           | Primary              |
| 201634969        | invasive ductal carcinoma         | positive      | 99            | negative      | 0             | 0           | Primary              |
| 201634970        | mucinous carcinoma                | None          | None          | None          | None          | None        | Primary              |
| 201635152        | invasive ductal carcinoma         | positive      | 90            | positive      | 35            | 0           | Primary              |
| 201635155        | invasive ductal carcinoma         | positive      | 99            | positive      | 2             | 1           | Primary              |

| Pathology_Number | Diagnosis                        | ER positivity | ER percentage | PR positivity | PR percentage | Her-2 score | Primary or Recurrent |
|------------------|----------------------------------|---------------|---------------|---------------|---------------|-------------|----------------------|
| 201635193        | invasive ductal carcinoma        | positive      | 10            | negative      | 0             | 3           | Primary              |
| 201635271        | invasive ductal carcinoma        | positive      | 99            | positive      | 40            | 0           | Primary              |
| 201635272        | invasive ductal carcinoma        | positive      | 99            | positive      | 99            | 0           | Primary              |
| 201635273        | invasive ductal carcinoma        | positive      | 99            | positive      | 90            | 0           | Primary              |
| 201635385        | invasive ductal carcinoma        | positive      | 97            | positive      | 7             | 1           | Primary              |
| 201635386        | invasive ductal carcinoma        | positive      | 98            | positive      | 95            | 1           | Primary              |
| 201635633        | invasive ductal carcinoma        | positive      | 95            | positive      | 15            | 1           | Primary              |
| 201635634        | invasive ductal carcinoma        | positive      | 90            | positive      | 10            | 3           | Primary              |
| 201635635        | invasive lobular carcinoma       | positive      | 99            | positive      | 85            | 0           | Primary              |
| 201635682        | invasive ductal carcinoma        | positive      | 90            | positive      | 99            | 1           | Primary              |
| 201635683        | invasive ductal carcinoma        | positive      | 99            | negative      | 0             | 0           | Primary              |
| 201635822        | invasive ductal carcinoma        | positive      | 99            | positive      | 15            | 3           | Primary              |
| 201635826        | mucinous carcinoma               | positive      | 99            | positive      | 80            | 0           | Primary              |
| 201635830        | mucinous carcinoma               | positive      | 99            | positive      | 97            | 0           | Primary              |
| 201635911        | invasive ductal carcinoma        | positive      | 98            | positive      | 10            | 2           | Primary              |
| 201636110        | invasive ductal carcinoma        | positive      | 99            | positive      | 30            | 2           | Primary              |
| 201636285        | invasive ductal carcinoma        | negative      | 0             | negative      | 0             | 3           | Primary              |
| 201636401        | invasive ductal carcinoma        | positive      | 98            | positive      | 98            | 2           | Primary              |
| 201636402        | invasive ductal carcinoma        | positive      | 60            | negative      | 0             | 0           | Primary              |
| 201636574        | invasive ductal carcinoma        | positive      | 95            | negative      | 0             | 2           | Primary              |
| 201636575        | invasive lobular carcinoma       | positive      | 99            | positive      | 60            | 1           | Primary              |
| 201636735        | invasive ductal carcinoma        | negative      | 0             | negative      | 0             | 3           | Primary              |
| 201636764        | encapsulated papillary carcinoma | positive      | 99            | positive      | 99            | None        | Primary              |
| 201636767        | invasive ductal carcinoma        | positive      | 85            | negative      | 0             | 3           | Primary              |
| 201636770        | invasive ductal carcinoma        | positive      | 65            | None          | None          | 3           | Primary              |
| 201636814        | invasive ductal carcinoma        | negative      | 0             | negative      | 0             | 3           | Primary              |
| 201636967        | invasive ductal carcinoma        | positive      | 99            | negative      | 0             | 0           | Primary              |
| 201637011        | invasive lobular carcinoma       | positive      | 90            | positive      | 55            | 1           | Primary              |
| 201637217        | invasive lobular carcinoma       | positive      | 95            | negative      | 0             | 0           | Primary              |
| 201637220        | invasive ductal carcinoma        | negative      | 0             | negative      | 0             | 3           | Primary              |
| 201637516        | invasive ductal carcinoma        | positive      |               | positive      |               | 3           | Primary              |
| 201637602        | invasive ductal carcinoma        | positive      | 99            | positive      | 95            | 1           | Primary              |
| 201637781        | invasive ductal carcinoma        | negative      | 0             | negative      | 0             | 3           | Primary              |
| 201637851        | invasive ductal carcinoma        | positive      | 99            | positive      | 99            | 0           | Primary              |
| 201637929        | invasive ductal carcinoma        | positive      | 99            | positive      | 90            | 2           | Primary              |
| 201638055        | invasive ductal carcinoma        | positive      | 99            | positive      | 90            | 0           | Primary              |
| 201638135        | invasive ductal carcinoma        | positive      | 90            | positive      | 2             | 0           | Primary              |

| Pathology_Number | Diagnosis                  | ER positivity | ER percentage | PR positivity | PR percentage | Her-2 score | Primary or Recurrent |
|------------------|----------------------------|---------------|---------------|---------------|---------------|-------------|----------------------|
| 201638136        | invasive ductal carcinoma  | positive      | 98            | positive      | 60            | 0           | Primary              |
| 201638137        | invasive ductal carcinoma  | positive      | 98            | positive      | 98            | 0           | Primary              |
| 201638138        | invasive ductal carcinoma  | positive      | 40            | negative      | 0             | 3           | Primary              |
| 201638363        | invasive ductal carcinoma  | positive      | 99            | positive      | 40            | 1           | Primary              |
| 201638372        | invasive ductal carcinoma  | positive      | 40            | negative      | 0             | 3           | Primary              |
| 201638585        | invasive ductal carcinoma  | positive      | 99            | positive      | 60            | 2           | Primary              |
| 201638587        | mucinous carcinoma         | positive      | 99            | positive      | 30            | 0           | Primary              |
| 201638590        | invasive ductal carcinoma  | positive      | 99            | positive      | 99            | 0           | Primary              |
| 201638591        | invasive ductal carcinoma  | positive      | 99            | positive      | 80            | 0           | Primary              |
| 201638593        | invasive ductal carcinoma  | positive      | 99            | positive      | 90            | 2           | Primary              |
| 201638684        | invasive ductal carcinoma  | positive      | 45            | positive      | 5             | 2           | Primary              |
| 201638685        | invasive ductal carcinoma  | positive      | 99            | positive      | 5             | 2           | Primary              |
| 201638686        | invasive ductal carcinoma  | positive      | 99            | positive      | 40            | 1           | Primary              |
| 201638790        | invasive ductal carcinoma  | None          | None          | None          | None          | None        | Primary              |
| 201638874        | invasive ductal carcinoma  | positive      | 99            | positive      | 5             | 0           | Primary              |
| 201638921        | invasive ductal carcinoma  | positive      | 90            | positive      | 35            | 0           | Primary              |
| 201638922        | neuroendocrine carcinoma   | positive      | 99            | positive      | 99            | 0           | Primary              |
| 201638923        | invasive ductal carcinoma  | positive      | 99            | positive      | 40            | 0           | Primary              |
| 201639019        | invasive ductal carcinoma  | negative      | 0             | negative      | 0             | 0           | Primary              |
| 201639023        | mucinous carcinoma         | positive      | 99            | negative      | 0             | 1           | Primary              |
| 201639104        | invasive ductal carcinoma  | negative      | 0             | negative      | 0             | 0           | Primary              |
| 201639220        | invasive ductal carcinoma  | positive      | 98            | positive      | 99            | 0           | Primary              |
| 201639437        | invasive lobular carcinoma | positive      |               | positive      | 80            | 0           | Primary              |
| 201639438        | invasive ductal carcinoma  | positive      | 70            | negative      | 0             | 3           | Primary              |
| 201639441        | mucinous carcinoma         | positive      | 99            | positive      | 99            | 0           | Primary              |
| 201639444        | invasive ductal carcinoma  | negative      | 0             | negative      | 0             | 3           | Primary              |
| 201639554        | invasive ductal carcinoma  | negative      | 0             | negative      | 0             | 0           | Primary              |
| 201639558        | invasive ductal carcinoma  | positive      | 99            | positive      | 70            | 0           | Primary              |
| 201639800        | invasive ductal carcinoma  | negative      | 0             | negative      | 0             | 1           | Primary              |
| 201639802        | invasive ductal carcinoma  | positive      | 99            | positive      | 80            | 0           | Primary              |
| 201639803        | invasive ductal carcinoma  | positive      | 65            | positive      | 55            | 2           | Primary              |
| 201639834        | invasive ductal carcinoma  | positive      | 99            | positive      | 5             | 2           | Primary              |
| 201639927        | mucinous carcinoma         | positive      | 99            | positive      | 70            | 1           | Primary              |
| 201639928        | invasive ductal carcinoma  | positive      | 95            | positive      | 2             | 0           | Primary              |
| 201639930        | invasive ductal carcinoma  | negative      | 0             | negative      | 0             | 0           | Primary              |
| 201639931        | invasive lobular carcinoma | positive      | 99            | negative      | 0             | 2           | Primary              |
| 201640029        | invasive ductal carcinoma  | positive      | 95            | positive      | 99            | 1           | Primary              |
| 201640032        | invasive ductal carcinoma  | positive      | 95            | None          | None          | 0           | Primary              |



| Pathology_Number | Diagnosis                        | ER positivity | ER percentage | PR positivity | PR percentage | Her-2 score | Primary or Recurrent |
|------------------|----------------------------------|---------------|---------------|---------------|---------------|-------------|----------------------|
| 201640034        | invasive ductal carcinoma        | negative      | 0             | negative      | 0             | 0           | Primary              |
| 201640035        | invasive ductal carcinoma        | negative      | 0             | negative      | 0             | 0           | Primary              |
| 201640060        | invasive ductal carcinoma        | positive      | 99            | positive      | 80            | 0           | Primary              |
| 201640133        | invasive ductal carcinoma        | positive      | 99            | positive      | 5             | 0           | Primary              |
| 201640298        | invasive ductal carcinoma        | positive      | 60            | negative      | 0             | 3           | Primary              |
| 201640315        | invasive ductal carcinoma        | positive      | 85            | negative      | 0             | 1           | Primary              |
| 201640339        | invasive ductal carcinoma        | positive      | 90            | negative      | 0             | 0           | Primary              |
| 201640340        | mucinous carcinoma               | positive      | 99            | positive      | 45            | 0           | Primary              |
| 201640524        | invasive ductal carcinoma        | negative      | 0             | negative      | 0             | 3           | Primary              |
| 201640527        | invasive ductal carcinoma        | negative      | 0             | negative      | 0             | 0           | Primary              |
| 201640714        | invasive ductal carcinoma        | positive      | 1             | negative      | 0             | 3           | Primary              |
| 201640782        | invasive ductal carcinoma        | positive      | 99            | negative      | 0             | 0           | Primary              |
| 201640829        | encapsulated papillary carcinoma | positive      | 99            | positive      | 99            | None        | Primary              |
| 201640830        | invasive lobular carcinoma       | positive      | 99            | positive      | 99            | 1           | Primary              |
| 201640832        | mucinous carcinoma               | positive      |               | positive      | 95            | 0           | Primary              |
| 201640947        | invasive ductal carcinoma        | negative      | 0             | negative      | 0             | 3           | Primary              |
| 201641119        | invasive ductal carcinoma        | negative      | 0             | negative      | 0             | 1           | Primary              |
| 201641124        | invasive ductal carcinoma        | positive      | 99            | positive      | 95            | 1           | Primary              |
| 201641127        | invasive ductal carcinoma        | positive      | 99            | positive      | 55            | 1           | Primary              |
| 201641217        | invasive ductal carcinoma        | positive      | 99            | negative      | 0             | 3           | Primary              |
| 201641243        | invasive ductal carcinoma        | positive      | 99            | positive      | 40            | 1           | Primary              |
| 201641408        | mucinous carcinoma               | positive      | 99            | positive      | 99            | 0           | Primary              |
| 201641409        | invasive ductal carcinoma        | positive      | 99            | positive      | 98            | 0           | Primary              |
| 201641412        | invasive ductal carcinoma        | positive      | 99            | negative      | 0             | 2           | Primary              |
| 201641756        | invasive ductal carcinoma        | positive      | 99            | positive      | 85            | 0           | Primary              |
| 201641757        | invasive ductal carcinoma        | positive      | 70            | positive      | 70            | 0           | Primary              |
| 201641772        | invasive ductal carcinoma        | positive      | 20            | negative      | 0             | 0           | Primary              |
| 201641857        | invasive ductal carcinoma        | negative      | 0             | negative      | 0             | 3           | Primary              |
| 201641974        | invasive ductal carcinoma        | positive      | 96            | positive      | 60            | 0           | Primary              |
| 201641977        | invasive ductal carcinoma        | positive      | 99            | positive      | 70            | 0           | Primary              |
| 201642010        | invasive ductal carcinoma        | negative      | 0             | negative      | 0             | 0           | Primary              |
| 201642011        | invasive ductal carcinoma        | positive      | 98            | positive      | 98            | 0           | Primary              |
| 201642054        | invasive ductal carcinoma        | positive      | 98            | positive      | 5             | 0           | Primary              |
| 201642055        | invasive ductal carcinoma        | positive      | 98            | positive      | 30            | 1           | Primary              |
| 201642057        | invasive ductal carcinoma        | positive      | 40            | negative      | 0             | 3           | Primary              |
| 201642249        | invasive ductal carcinoma        | negative      | 0             | negative      | 0             | 3           | Primary              |
| 201642344        | invasive ductal carcinoma        | negative      | 0             | negative      | 0             | 1           | Primary              |

| Pathology_Number | Diagnosis                 | ER positivity | ER percentage | PR positivity | PR percentage | Her-2 score | Primary or Recurrent |
|------------------|---------------------------|---------------|---------------|---------------|---------------|-------------|----------------------|
| 201642350        | invasive ductal carcinoma | negative      | 0             | negative      | 0             | 0           | Primary              |
| 201642369        | invasive ductal carcinoma | positive      | 95            | positive      | 5             | 1           | Primary              |
| 201642420        | invasive ductal carcinoma | negative      | 0             | negative      | 0             | 3           | Primary              |
| 201642421        | invasive ductal carcinoma | positive      | 98            | positive      | 90            | 0           | Primary              |
| 201642423        | invasive ductal carcinoma | positive      | 98            | positive      | 90            | 1           | Primary              |
| 201642592        | invasive ductal carcinoma | negative      | 0             | negative      | 0             | 0           | Primary              |
| 201642593        | invasive ductal carcinoma | negative      | 0             | negative      | 0             | 0           | Primary              |
| 201642598        | invasive ductal carcinoma | positive      | 97            | positive      | 3             | 0           | Primary              |
| 201642600        | invasive ductal carcinoma | positive      | 98            | negative      | 0             | 1           | Primary              |
| 201642740        | mucinous carcinoma        | positive      | 98            | positive      | 20            | 0           | Primary              |
| 201642743        | invasive ductal carcinoma | None          | None          | None          | None          | None        | Primary              |
| 201642744        | invasive ductal carcinoma | positive      | 98            | positive      |               | 0           | Primary              |
| 201642745        | invasive ductal carcinoma | positive      | 95            | positive      | 10            | 2           | Primary              |
| 201642897        | mucinous carcinoma        | positive      | 35            | positive      | 98            | 0           | Primary              |
| 201642900        | invasive ductal carcinoma | positive      | 98            | negative      | 0             | 1           | Primary              |
| 201642901        | invasive ductal carcinoma | positive      | 70            | negative      | 0             | 0           | Primary              |
| 201642903        | invasive ductal carcinoma | positive      |               | negative      | 0             | 0           | Primary              |
| 201642908        | invasive ductal carcinoma | positive      | 98            | negative      | 0             | 0           | Primary              |
| 201643138        | invasive ductal carcinoma | positive      | 98            | positive      | 98            | 1           | Primary              |
| 201643144        | invasive ductal carcinoma | positive      | 98            | positive      | 98            | 0           | Primary              |
| 201643148        | invasive ductal carcinoma | positive      | 98            | negative      | 0             | 2           | Primary              |
| 201643391        | invasive ductal carcinoma | positive      | 98            | positive      | 98            | 2           | Primary              |
| 201643393        | invasive ductal carcinoma | positive      | 98            | positive      | 98            | 2           | Primary              |
| 201643394        | invasive ductal carcinoma | positive      | 98            | positive      | 10            | 0           | Primary              |
| 201643590        | invasive ductal carcinoma | positive      | 40            | negative      | 0             | 0           | Primary              |
| 201643595        | invasive ductal carcinoma | negative      | 0             | negative      | 0             | 2           | Primary              |
| 201643635        | invasive ductal carcinoma | positive      | 98            | positive      | 95            | 1           | Primary              |
| 201643700        | invasive ductal carcinoma | positive      | 98            | positive      | 98            | 0           | Primary              |
| 201643701        | invasive ductal carcinoma | positive      | 80            | positive      | 60            | 3           | Primary              |
| 201643823        | invasive ductal carcinoma | positive      | 98            | positive      | 98            | 1           | Primary              |
| 201643829        | invasive ductal carcinoma | positive      | 98            | positive      | 70            | 1           | Primary              |
| 201644582        | invasive ductal carcinoma | positive      | 95            | positive      | 2             | 0           | Primary              |
| 201644621        | invasive ductal carcinoma | positive      | 90            | positive      | 30            | 1           | Primary              |
| 201644623        | invasive ductal carcinoma | positive      | 85            | positive      | 90            | 0           | Primary              |
| 201644624        | mucinous carcinoma        | positive      | 99            | positive      | 95            | 1           | Primary              |
| 201644625        | invasive ductal carcinoma | positive      | 95            | positive      | 85            | 2           | Primary              |
| 201644893        | invasive ductal carcinoma | negative      | 0             | negative      | 0             | 0           | Primary              |
| 201644918        | invasive ductal carcinoma | negative      | 0             | negative      | 0             | 0           | Primary              |

| Pathology_Number | Diagnosis                  | ER positivity | ER percentage | PR positivity | PR percentage | Her-2 score | Primary or Recurrent |
|------------------|----------------------------|---------------|---------------|---------------|---------------|-------------|----------------------|
| 201645108        | invasive ductal carcinoma  | positive      | 96            | negative      | 0             | 0           | Primary              |
| 201645111        | invasive ductal carcinoma  | negative      | 0             | negative      | 0             | 0           | Primary              |
| 201645113        | invasive ductal carcinoma  | positive      | 98            | negative      | 0             | 2           | Primary              |
| 201645323        | invasive ductal carcinoma  | positive      | 95            | positive      | 98            | 2           | Primary              |
| 201645440        | invasive ductal carcinoma  | positive      | 85            | positive      | 2             | 0           | Primary              |
| 201645441        | invasive ductal carcinoma  | positive      | 98            | negative      | 0             | 2           | Primary              |
| 201645442        | invasive ductal carcinoma  | positive      | 95            | positive      | 75            | 2           | Primary              |
| 201645532        | invasive ductal carcinoma  | positive      | 5             | negative      | 0             | 3           | Primary              |
| 201645535        | invasive ductal carcinoma  | positive      | 98            | positive      | 1             | 2           | Primary              |
| 201645721        | invasive ductal carcinoma  | positive      | 30            | negative      | 0             | 0           | Primary              |
| 201645722        | invasive ductal carcinoma  | negative      | 0             | negative      | 0             | 3           | Primary              |
| 201645915        | invasive ductal carcinoma  | None          | None          | None          | None          | None        | Primary              |
| 201646024        | invasive ductal carcinoma  | positive      | 5             | negative      | 0             | 2           | Primary              |
| 201646028        | invasive lobular carcinoma | positive      | 98            | positive      | 95            | 2           | Primary              |
| 201646031        | invasive lobular carcinoma | positive      | 98            | None          | None          | 2           | Primary              |
| 201646087        | invasive ductal carcinoma  | positive      | 90            | positive      | 75            | 2           | Primary              |
| 201646099        | invasive ductal carcinoma  | positive      | 90            | positive      | 70            | 2           | Primary              |
| 201646284        | invasive ductal carcinoma  | positive      | 98            | positive      | 90            | 3           | Primary              |
| 201646285        | invasive ductal carcinoma  | positive      | 98            | positive      | 20            | 2           | Primary              |
| 201646291        | invasive ductal carcinoma  | positive      | 95            | positive      | 98            | 0           | Primary              |
| 201646518        | invasive ductal carcinoma  | negative      | 0             | negative      | 0             | 0           | Primary              |
| 201646605        | invasive ductal carcinoma  | positive      | 98            | positive      | 98            | 2           | Primary              |
| 201646607        | invasive ductal carcinoma  | positive      | 98            | positive      | 98            | 2           | Primary              |
| 201646710        | invasive ductal carcinoma  | positive      | 98            | positive      | 85            | 2           | Primary              |
| 201646712        | invasive ductal carcinoma  | positive      | 98            | positive      | 90            | 2           | Primary              |
| 201646715        | invasive ductal carcinoma  | positive      | 98            | positive      | 98            | 2           | Primary              |
| 201646716        | invasive ductal carcinoma  | negative      | 0             | negative      | 0             | 2           | Primary              |
| 201646724        | invasive ductal carcinoma  | positive      |               | positive      |               | 1           | Primary              |
| 201646786        | invasive ductal carcinoma  | negative      | 0             | negative      | 0             | 1           | Primary              |
| 201646787        | invasive ductal carcinoma  | positive      | 90            | positive      | 35            | 1           | Primary              |
| 201646788        | invasive ductal carcinoma  | positive      | 98            | positive      | 95            | 2           | Primary              |
| 201646902        | invasive ductal carcinoma  | positive      | 98            | positive      | 98            | 1           | Primary              |
| 201646907        | invasive ductal carcinoma  | positive      | 98            | positive      | 98            | 2           | Primary              |
| 201646940        | invasive ductal carcinoma  | positive      | 99            | positive      | 95            | 1           | Primary              |
| 201646952        | invasive ductal carcinoma  | positive      | 90            | positive      | 60            | 0           | Primary              |
| 201647223        | invasive ductal carcinoma  | positive      |               | positive      | 60            | 2           | Primary              |
| 201647226        | invasive ductal carcinoma  | positive      | 98            | positive      | 10            | 2           | Primary              |
| 201647227        | mucinous carcinoma         | positive      | 98            | positive      | 90            | 0           | Primary              |

| Pathology_Number | Diagnosis                        | ER positivity | ER percentage | PR positivity | PR percentage | Her-2 score | Primary or Recurrent |
|------------------|----------------------------------|---------------|---------------|---------------|---------------|-------------|----------------------|
| 201647427        | invasive ductal carcinoma        | negative      | 0             | negative      | 0             | 2           | Primary              |
| 201647608        | invasive ductal carcinoma        | positive      | 98            | positive      | 65            | 1           | Primary              |
| 201647693        | invasive ductal carcinoma        | positive      | 98            | negative      | 0             | 0           | Primary              |
| 201647694        | invasive ductal carcinoma        | positive      | 98            | positive      | 80            | 0           | Primary              |
| 201647695        | invasive ductal carcinoma        | negative      | 0             | negative      | 0             | None        | Primary              |
| 201647817        | invasive ductal carcinoma        | positive      | 40            | positive      | 5             | 2           | Primary              |
| 201647854        | invasive ductal carcinoma        | positive      | 95            | positive      | 99            | 2           | Primary              |
| 201647906        | invasive ductal carcinoma        | positive      | 70            | positive      | 10            | 0           | Primary              |
| 201648036        | invasive ductal carcinoma        | positive      | 98            | positive      | 98            | 1           | Primary              |
| 201648071        | invasive mammary carcinoma       | positive      | 99            | positive      | 45            | 0           | Primary              |
| 201648266        | invasive ductal carcinoma        | positive      | 98            | positive      | 40            | 0           | Primary              |
| 201648269        | invasive ductal carcinoma        | positive      | 98            | positive      | 98            | 2           | Primary              |
| 201648271        | invasive ductal carcinoma        | positive      | 98            | positive      | 98            | 2           | Primary              |
| 201648384        | invasive ductal carcinoma        | positive      | 95            | positive      | 95            | 0           | Primary              |
| 201648385        | invasive ductal carcinoma        | positive      | 99            | positive      | 99            | 1           | Primary              |
| 201648386        | invasive ductal carcinoma        | positive      | 99            | positive      | 30            | 1           | Primary              |
| 201648387        | invasive ductal carcinoma        | positive      | 5             | negative      | 0             | 3           | Primary              |
| 201648759        | invasive ductal carcinoma        | positive      | 95            | positive      | 98            | 1           | Primary              |
| 201648760        | invasive ductal carcinoma        | positive      | 98            | positive      | 80            | 2           | Primary              |
| 201648814        | invasive ductal carcinoma        | negative      | 0             | positive      | 3             | 2           | Primary              |
| 201648859        | invasive ductal carcinoma        | positive      | 98            | positive      | 85            | 1           | Primary              |
| 201648862        | invasive ductal carcinoma        | negative      | 0             | negative      | 0             | 2           | Recurrent            |
| 201648863        | invasive ductal carcinoma        | positive      | 98            | positive      | 98            | 0           | Primary              |
| 201649000        | invasive ductal carcinoma        | negative      | 0             | negative      | 0             | 3           | Primary              |
| 201649004        | invasive ductal carcinoma        | positive      | 98            | negative      | 0             | 2           | Primary              |
| 201649052        | invasive ductal carcinoma        | negative      | 0             | negative      | 0             | 2           | Primary              |
| 201649094        | invasive ductal carcinoma        | positive      | 98            | positive      | 98            | 1           | Primary              |
| 201649209        | invasive ductal carcinoma        | positive      | 98            | positive      | 30            | 2           | Primary              |
| 201649210        | mucinous carcinoma               | positive      | 98            | positive      | 5             | 1           | Primary              |
| 201649221        | encapsulated papillary carcinoma | positive      | 99            | positive      | 99            | 1           | Primary              |
| 201649222        | invasive ductal carcinoma        | positive      | 80            | positive      | 90            | 1           | Primary              |
| 201649474        | invasive ductal carcinoma        | positive      | 20            | negative      | 0             | 3           | Primary              |
| 201649477        | invasive ductal carcinoma        | negative      | 0             | negative      | 0             | 3           | Primary              |
| 201649480        | invasive ductal carcinoma        | positive      | 60            | positive      | 30            | 2           | Primary              |
| 201649481        | invasive ductal carcinoma        | positive      | 98            | positive      | 80            | 2           | Primary              |
| 201649584        | invasive ductal carcinoma        | positive      | 5             | negative      | 0             | 2           | Primary              |
| 201649585        | mucinous carcinoma               | positive      | 95            | positive      | 55            | 1           | Primary              |

| Pathology_Number | Diagnosis                  | ER positivity | ER percentage | PR positivity | PR percentage | Her-2 score | Primary or Recurrent |
|------------------|----------------------------|---------------|---------------|---------------|---------------|-------------|----------------------|
| 201649599        | invasive ductal carcinoma  | positive      | 5             | negative      | 0             | 3           | Primary              |
| 201649600        | invasive ductal carcinoma  | positive      | 98            | positive      | 85            | 2           | Primary              |
| 201649601        | invasive ductal carcinoma  | positive      | 95            | negative      | 0             | 0           | Primary              |
| 201649729        | invasive ductal carcinoma  | negative      | 0             | negative      | 0             | 2           | Primary              |
| 201649912        | invasive ductal carcinoma  | positive      | 98            | positive      | 98            | 2           | Primary              |
| 201649914        | invasive ductal carcinoma  | positive      | 98            | negative      | 0             | 2           | Primary              |
| 201649915        | invasive ductal carcinoma  | positive      | 98            | positive      | 70            | 3           | Primary              |
| 201649979        | invasive ductal carcinoma  | positive      | 99            | positive      | 5             | 1           | Primary              |
| 201650026        | invasive lobular carcinoma | positive      | 95            | positive      | 80            | 1           | Primary              |
| 201650027        | invasive ductal carcinoma  | positive      | 85            | positive      | 5             | 1           | Primary              |
| 201650028        | invasive ductal carcinoma  | negative      | 0             | negative      | 0             | 0           | Primary              |
| 201650029        | invasive ductal carcinoma  | None          | None          | None          | None          | None        | Primary              |
| 201650030        | invasive ductal carcinoma  | positive      | 95            | positive      | 95            | 0           | Primary              |
| 201650031        | solid papillary carcinoma  | positive      | 99            | positive      | 99            | 0           | Primary              |
| 201650280        | invasive ductal carcinoma  | positive      | 98            | negative      | 0             | 2           | Primary              |
| 201650282        | mucinous carcinoma         | negative      | 0             | negative      | 0             | 3           | Primary              |
| 201650364        | invasive ductal carcinoma  | positive      | 10            | negative      | 0             | 0           | Primary              |
| 201650365        | invasive ductal carcinoma  | positive      | 90            | negative      | 0             | 3           | Primary              |
| 201650391        | invasive ductal carcinoma  | negative      | 0             | negative      | 0             | 1           | Primary              |
| 201650395        | invasive ductal carcinoma  | negative      | 0             | negative      | 0             | 0           | Primary              |
| 201650402        | invasive ductal carcinoma  | negative      | 0             | negative      | 0             | 0           | Primary              |
| 201650488        | invasive ductal carcinoma  | negative      | 0             | negative      | 0             | 0           | Primary              |
| 201650500        | invasive ductal carcinoma  | positive      | 80            | positive      | 60            | 1           | Primary              |
| 201650657        | invasive ductal carcinoma  | positive      | 2             | negative      | 0             | 3           | Primary              |
| 201650658        | mucinous carcinoma         | positive      | 98            | None          | None          | 2           | Primary              |
| 201650775        | invasive ductal carcinoma  | positive      | 98            | positive      | 80            | 0           | Primary              |
| 201650777        | invasive ductal carcinoma  | positive      | 98            | positive      |               | 2           | Primary              |
| 201650778        | invasive ductal carcinoma  | positive      | 98            | positive      | 40            | 2           | Primary              |
| 201650911        | invasive ductal carcinoma  | negative      | 0             | negative      | 0             | 3           | Primary              |
| 201650913        | invasive ductal carcinoma  | positive      | 60            | negative      | 0             | 3           | Primary              |
| 201650914        | invasive ductal carcinoma  | positive      | 98            | positive      | 80            | 0           | Primary              |
| 201651168        | invasive ductal carcinoma  | positive      | 95            | positive      | 98            | 2           | Primary              |
| 201651299        | invasive ductal carcinoma  | positive      | 100           | positive      | 95            | 2           | Primary              |
| 201651406        | invasive ductal carcinoma  | positive      | 98            | positive      | 95            | 0           | Primary              |
| 201651487        | invasive ductal carcinoma  | positive      | 99            | positive      | 90            | 2           | Primary              |
| 201651493        | invasive ductal carcinoma  | negative      | 0             | negative      | 0             | 0           | Primary              |
| 201651494        | invasive ductal carcinoma  | positive      | 95            | positive      | 85            | 0           | Primary              |
| 201651495        | invasive ductal carcinoma  | negative      | 0             | negative      | 0             | 0           | Primary              |

| Pathology_Number | Diagnosis                        | ER positivity | ER percentage | PR positivity | PR percentage | Her-2 score | Primary or Recurrent |
|------------------|----------------------------------|---------------|---------------|---------------|---------------|-------------|----------------------|
| 201651633        | invasive ductal carcinoma        | negative      | 0             | negative      | 0             | 3           | Primary              |
| 201651634        | invasive ductal carcinoma        | positive      | 98            | positive      | 98            | 1           | Primary              |
| 201651642        | invasive ductal carcinoma        | positive      | 98            | positive      | 85            | 1           | Primary              |
| 201651710        | invasive ductal carcinoma        | positive      | 98            | negative      | 0             | 3           | Primary              |
| 201651804        | invasive ductal carcinoma        | positive      | 98            | positive      | 85            | 2           | Primary              |
| 201651853        | invasive ductal carcinoma        | positive      | 15            | negative      | 0             | 3           | Primary              |
| 201651946        | mucinous carcinoma               | positive      | 98            | positive      | 98            | 1           | Primary              |
| 201651948        | invasive ductal carcinoma        | positive      | 95            | negative      | 0             | 0           | Primary              |
| 201652043        | invasive ductal carcinoma        | positive      | 5             | positive      | 35            | 1           | Primary              |
| 201652047        | invasive ductal carcinoma        | positive      | 99            | positive      | 5             | 2           | Primary              |
| 201652049        | invasive ductal carcinoma        | positive      | 85            | negative      | 0             | 3           | Primary              |
| 201652195        | invasive ductal carcinoma        | positive      | 90            | positive      | 98            | 0           | Primary              |
| 201652397        | invasive ductal carcinoma        | negative      | 0             | negative      | 0             | 3           | Recurrent            |
| 201652418        | invasive ductal carcinoma        | negative      | 0             | negative      | 0             | 2           | Primary              |
| 201652491        | invasive ductal carcinoma        | positive      | 98            | positive      | 98            | 2           | Primary              |
| 201652494        | invasive ductal carcinoma        | positive      | 90            | negative      | 0             | 3           | Primary              |
| 201652697        | encapsulated papillary carcinoma | positive      | 98            | positive      | 98            | 0           | Primary              |
| 201652702        | invasive ductal carcinoma        | positive      | 98            | positive      | 95            | 2           | Primary              |
| 201652704        | invasive ductal carcinoma        | positive      | 98            | positive      | 20            | 2           | Primary              |
| 201652721        | invasive ductal carcinoma        | positive      | 99            | positive      | 99            | 1           | Primary              |
| 201652722        | invasive ductal carcinoma        | positive      | 90            | positive      | 80            | 2           | Primary              |
| 201652723        | mucinous carcinoma               | positive      | 90            | positive      | 50            | 2           | Primary              |
| 201652816        | invasive ductal carcinoma        | positive      | 98            | positive      | 98            | 2           | Primary              |
| 201652819        | mucinous carcinoma               | positive      | 98            | positive      | 98            | 0           | Primary              |
| 201653086        | invasive ductal carcinoma        | positive      | 98            | positive      | 98            | 2           | Primary              |
| 201653182        | invasive ductal carcinoma        | positive      | 80            | negative      | 0             | 0           | Primary              |
| 201653183        | invasive ductal carcinoma        | negative      | 0             | negative      | 0             | 0           | Primary              |
| 201653184        | invasive ductal carcinoma        | positive      | 98            | positive      | 98            | 1           | Primary              |
| 201653188        | invasive ductal carcinoma        | positive      | 98            | positive      | 60            | 3           | Primary              |
| 201653492        | invasive ductal carcinoma        | positive      | 98            | positive      | 65            | 2           | Primary              |
| 201653558        | invasive ductal carcinoma        | positive      | 95            | positive      | 1             | 2           | Primary              |
| 201654226        | invasive ductal carcinoma        | negative      | 0             | negative      | 0             | 2           | Primary              |
| 201654229        | invasive ductal carcinoma        | positive      | 98            | positive      | 65            | 3           | Primary              |
| 201654399        | invasive ductal carcinoma        | positive      | 1             | negative      | 0             | 3           | Primary              |
| 201654874        | invasive ductal carcinoma        | positive      | 2             | negative      | 0             | 0           | Recurrent            |
| 201654886        | invasive ductal carcinoma        | positive      | 95            | positive      | 30            | 2           | Primary              |
| 201654887        | invasive ductal carcinoma        | negative      | 0             | positive      | 60            | 0           | Primary              |

| Pathology_Number | Diagnosis                        | ER positivity | ER percentage | PR positivity | PR percentage | Her-2 score | Primary or Recurrent |
|------------------|----------------------------------|---------------|---------------|---------------|---------------|-------------|----------------------|
| 201654979        | invasive ductal carcinoma        | positive      | 90            | positive      | 20            | 2           | Primary              |
| 201654982        | invasive ductal carcinoma        | positive      | 98            | positive      | 60            | 2           | Primary              |
| 201655098        | invasive ductal carcinoma        | positive      |               | positive      | 80            | 0           | Primary              |
| 201655236        | invasive ductal carcinoma        | positive      | 95            | positive      | 40            | 2           | Primary              |
| 201655237        | invasive ductal carcinoma        | negative      | 0             | negative      | 0             | 3           | Primary              |
| 201655239        | invasive ductal carcinoma        | positive      | 80            | positive      | 65            | 2           | Primary              |
| 201655601        | solid papillary carcinoma        | positive      | 98            | positive      | 98            | 0           | Primary              |
| 201655602        | invasive ductal carcinoma        | positive      | 98            | positive      | 95            | 2           | Primary              |
| 201655747        | invasive lobular carcinoma       | positive      | 98            | positive      | 10            | 1           | Primary              |
| 201655816        | invasive ductal carcinoma        | positive      | 90            | positive      | 15            | 1           | Primary              |
| 201655912        | invasive ductal carcinoma        | positive      | 95            | positive      | 100           | 0           | Primary              |
| 201655966        | invasive ductal carcinoma        | positive      | 5             | negative      | 0             | 0           | Primary              |
| 201656166        | invasive ductal carcinoma        | positive      | 98            | positive      | 40            | 1           | Primary              |
| 201656251        | encapsulated papillary carcinoma | positive      | 100           | positive      | 20            | 0           | Primary              |
| 201656402        | invasive ductal carcinoma        | positive      | 98            | positive      | 65            | 2           | Primary              |
| 201656405        | invasive ductal carcinoma        | negative      | 0             | negative      | 0             | 3           | Primary              |
| 201656697        | invasive ductal carcinoma        | negative      | 0             | negative      | 0             | 0           | Primary              |
| 201656700        | invasive ductal carcinoma        | positive      | 98            | positive      | 97            | 1           | Primary              |
| 201656702        | invasive ductal carcinoma        | positive      | 95            | positive      | 40            | 2           | Primary              |
| 201656837        | mucinous carcinoma               | positive      | 98            | positive      | 98            | 0           | Primary              |
| 201657351        | invasive ductal carcinoma        | positive      | 20            | negative      | 0             | 3           | Primary              |
| 201700054        | invasive ductal carcinoma        | negative      | 0             | negative      | 0             | 3           | Primary              |
| 201700058        | invasive ductal carcinoma        | positive      | 95            | positive      | 95            | 1           | Primary              |
| 201700059        | invasive ductal carcinoma        | positive      | 99            | positive      | 10            | 2           | Primary              |
| 201700068        | invasive ductal carcinoma        | positive      | 80            | positive      | 60            | 1           | Primary              |
| 201700070        | invasive ductal carcinoma        | negative      | 0             | negative      | 0             | 3           | Recurrent            |
| 201700351        | invasive ductal carcinoma        | positive      | 98            | positive      | 85            | 0           | Primary              |
| 201700379        | invasive ductal carcinoma        | positive      | 98            | positive      | 60            | 0           | Primary              |
| 201700429        | invasive ductal carcinoma        | positive      | 98            | negative      | 0             | 2           | Primary              |
| 201700430        | invasive ductal carcinoma        | negative      | 0             | negative      | 0             | 3           | Primary              |
| 201700548        | invasive mammary carcinoma       | positive      | 98            | positive      | 98            | 1           | Primary              |
| 201700549        | invasive mammary carcinoma       | positive      | 98            | positive      | 80            | 0           | Primary              |
| 201700551        | invasive ductal carcinoma        | positive      | 98            | positive      | 70            | 2           | Primary              |
| 201700552        | invasive ductal carcinoma        | negative      | 0             | negative      | 0             | 2           | Primary              |
| 201700631        | invasive ductal carcinoma        | positive      | 95            | positive      | 40            | 0           | Primary              |
| 201700726        | mucinous carcinoma               | positive      | 98            | positive      | 98            | 0           | Primary              |
| 201700811        | invasive ductal carcinoma        | positive      | 90            | positive      | 70            | 1           | Primary              |

| Pathology_Number | Diagnosis                  | ER positivity | ER percentage | PR positivity | PR percentage | Her-2 score | Primary or Recurrent |
|------------------|----------------------------|---------------|---------------|---------------|---------------|-------------|----------------------|
| 201701074        | invasive ductal carcinoma  | negative      | 0             | negative      | 0             | 3           | Primary              |
| 201701076        | invasive ductal carcinoma  | positive      | 95            | positive      | 99            | 0           | Primary              |
| 201701229        | invasive ductal carcinoma  | negative      | 0             | negative      | 0             | 2           | Primary              |
| 201701231        | invasive ductal carcinoma  | negative      | 0             | negative      | 0             | 0           | Primary              |
| 201701540        | invasive ductal carcinoma  | positive      | 98            | positive      | 70            | 2           | Primary              |
| 201701629        | invasive ductal carcinoma  | negative      | 0             | negative      | 0             | 0           | Primary              |
| 201701710        | invasive ductal carcinoma  | positive      | 98            | positive      | 98            | 0           | Primary              |
| 201701744        | invasive ductal carcinoma  | positive      | 98            | negative      | 0             | 0           | Primary              |
| 201701747        | invasive ductal carcinoma  | positive      | 98            | positive      | 98            | 0           | Primary              |
| 201701847        | invasive lobular carcinoma | positive      | 98            | positive      | 98            | 1           | Primary              |
| 201701848        | invasive lobular carcinoma | positive      | 98            | None          | None          | 0           | Primary              |
| 201702079        | invasive ductal carcinoma  | positive      | 98            | positive      | 98            | 0           | Primary              |
| 201702185        | invasive ductal carcinoma  | positive      |               | positive      |               | 0           | Primary              |
| 201702190        | invasive ductal carcinoma  | positive      | 95            | positive      | 30            | 1           | Primary              |
| 201702191        | metaplastic carcinoma      | negative      | 0             | negative      | 0             | 0           | Primary              |
| 201702335        | invasive ductal carcinoma  | positive      | 98            | positive      | 70            | 0           | Primary              |
| 201702340        | mucinous carcinoma         | positive      | 98            | positive      | 87            | 0           | Primary              |
| 201702514        | invasive ductal carcinoma  | positive      | 98            | positive      | 2             | 2           | Primary              |
| 201702519        | invasive ductal carcinoma  | positive      | 95            | positive      | 30            | 0           | Primary              |
| 201702522        | invasive ductal carcinoma  | negative      | 0             | negative      | 0             | 2           | Primary              |
| 201702614        | mucinous carcinoma         | positive      | 99            | positive      | 99            | 0           | Primary              |
| 201702616        | invasive ductal carcinoma  | negative      | 0             | negative      | 0             | 3           | Primary              |
| 201702720        | invasive ductal carcinoma  | positive      | 95            | negative      | 0             | 0           | Primary              |
| 201702725        | invasive ductal carcinoma  | positive      | 95            | negative      | 0             | 0           | Primary              |
| 201702836        | invasive ductal carcinoma  | positive      | 95            | positive      | 40            | 1           | Primary              |
| 201702837        | solid papillary carcinoma  | positive      | 99            | positive      | 99            | 0           | Primary              |
| 201702838        | invasive ductal carcinoma  | positive      | 99            | positive      | 95            | 0           | Primary              |
| 201702932        | invasive ductal carcinoma  | negative      | 0             | negative      | 0             | 0           | Primary              |
| 201702936        | invasive ductal carcinoma  | positive      | 98            | positive      | 55            | 3           | Primary              |
| 201702937        | invasive ductal carcinoma  | negative      | 0             | negative      | 0             | 1           | Primary              |
| 201702938        | invasive ductal carcinoma  | positive      | 90            | positive      | 70            | 2           | Primary              |
| 201703012        | invasive ductal carcinoma  | None          | None          | None          | None          | None        | Primary              |
| 201703199        | invasive ductal carcinoma  | negative      | 0             | negative      | 0             | 0           | Primary              |
| 201703312        | invasive ductal carcinoma  | positive      | 98            | positive      | 98            | 0           | Primary              |
| 201703314        | invasive ductal carcinoma  | positive      | 55            | negative      | 0             | 2           | Primary              |
| 201703319        | invasive ductal carcinoma  | positive      | 98            | positive      | 98            | 0           | Primary              |
| 201703320        | invasive ductal carcinoma  | positive      | 35            | positive      | 15            | 0           | Primary              |
| 201703479        | invasive ductal carcinoma  | positive      | 90            | positive      | 10            | 0           | Primary              |



| Pathology_Number | Diagnosis                  | ER positivity | ER percentage | PR positivity | PR percentage | Her-2 score | Primary or Recurrent |
|------------------|----------------------------|---------------|---------------|---------------|---------------|-------------|----------------------|
| 201703482        | invasive ductal carcinoma  | positive      | 95            | positive      | 5             | 0           | Primary              |
| 201703617        | invasive ductal carcinoma  | positive      | 98            | positive      | 98            | 2           | Primary              |
| 201703618        | invasive ductal carcinoma  | positive      | 98            | positive      | 40            | 1           | Primary              |
| 201703643        | invasive ductal carcinoma  | negative      | 0             | negative      | 0             | 3           | Primary              |
| 201703650        | invasive ductal carcinoma  | negative      | 0             | negative      | 0             | 3           | Primary              |
| 201703673        | tubular carcinoma          | positive      | 98            | positive      | 98            | 0           | Primary              |
| 201703796        | invasive ductal carcinoma  | negative      | 0             | negative      | 0             | 3           | Primary              |
| 201703799        | invasive ductal carcinoma  | positive      | 98            | positive      | 10            | 2           | Primary              |
| 201703902        | invasive ductal carcinoma  | negative      | 0             | negative      | 0             | 2           | Primary              |
| 201704047        | invasive ductal carcinoma  | negative      | 0             | negative      | 0             | 3           | Primary              |
| 201704054        | mucinous carcinoma         | positive      | 98            | positive      | 2             | 2           | Primary              |
| 201704126        | invasive ductal carcinoma  | positive      | 98            | positive      | 90            | 3           | Primary              |
| 201704136        | invasive ductal carcinoma  | negative      | 0             | negative      | 0             | 3           | Primary              |
| 201704223        | invasive ductal carcinoma  | positive      | 95            | positive      | 98            | 1           | Primary              |
| 201704227        | invasive ductal carcinoma  | negative      | 0             | negative      | 0             | 0           | Primary              |
| 201704228        | invasive ductal carcinoma  | positive      | 98            | positive      | 40            | 2           | Primary              |
| 201704348        | invasive ductal carcinoma  | positive      |               | positive      |               | 0           | Primary              |
| 201704409        | invasive ductal carcinoma  | negative      | 0             | negative      | 0             | 2           | Primary              |
| 201704410        | invasive ductal carcinoma  | negative      | 0             | negative      | 0             | 0           | Primary              |
| 201704781        | invasive ductal carcinoma  | positive      | 95            | positive      | 98            | 0           | Primary              |
| 201704784        | invasive ductal carcinoma  | positive      | 90            | positive      | 10            | 1           | Primary              |
| 201704787        | invasive ductal carcinoma  | positive      | 95            | positive      | 98            | 0           | Primary              |
| 201704964        | invasive ductal carcinoma  | positive      | 40            | positive      | 5             | 3           | Recurrent            |
| 201704982        | invasive ductal carcinoma  | None          | None          | None          | None          | None        | Primary              |
| 201704983        | invasive mammary carcinoma | negative      | 0             | negative      | 0             | 0           | Primary              |
| 201704987        | invasive ductal carcinoma  | negative      | 0             | negative      | 0             | 3           | Primary              |
| 201705264        | invasive ductal carcinoma  | positive      | 80            | positive      | 15            | 3           | Primary              |
| 201705287        | invasive ductal carcinoma  | positive      | 90            | positive      | 2             | 1           | Primary              |
| 201705293        | invasive ductal carcinoma  | positive      | 98            | positive      | 1             | 2           | Primary              |
| 201705467        | invasive mammary carcinoma | positive      | 95            | positive      | 70            | 2           | Primary              |
| 201705473        | invasive ductal carcinoma  | positive      | 30            | negative      | 0             | 3           | Primary              |
| 201705633        | invasive ductal carcinoma  | positive      | 90            | positive      | 60            | 3           | Primary              |
| 201705638        | invasive ductal carcinoma  | positive      | 95            | positive      | 95            | 0           | Primary              |
| 201705792        | invasive ductal carcinoma  | negative      | 0             | negative      | 0             | 0           | Primary              |
| 201705794        | invasive ductal carcinoma  | negative      | 0             | negative      | 0             | 2           | Primary              |
| 201705795        | invasive lobular carcinoma | positive      | 98            | positive      | 40            | 0           | Primary              |
| 201705945        | invasive mammary carcinoma | positive      | 98            | positive      | 55            | 2           | Primary              |
| 201705946        | invasive ductal carcinoma  | positive      | 45            | negative      | 0             | 0           | Primary              |

| Pathology_Number | Diagnosis                  | ER positivity | ER percentage | PR positivity | PR percentage | Her-2 score | Primary or Recurrent |
|------------------|----------------------------|---------------|---------------|---------------|---------------|-------------|----------------------|
| 201705948        | invasive ductal carcinoma  | negative      | 0             | negative      | 0             | 3           | Primary              |
| 201706258        | invasive ductal carcinoma  | positive      | 10            | positive      | 15            | 2           | Primary              |
| 201706259        | invasive ductal carcinoma  | positive      | 80            | positive      | 5             | 0           | Primary              |
| 201706260        | invasive ductal carcinoma  | negative      | 0             | negative      | 0             | 0           | Primary              |
| 201706263        | invasive ductal carcinoma  | positive      | 98            | positive      | 80            | 0           | Primary              |
| 201706494        | invasive ductal carcinoma  | negative      | 0             | negative      | 0             | 0           | Primary              |
| 201706495        | invasive lobular carcinoma | positive      | 95            | positive      | 70            | 0           | Primary              |
| 201706496        | invasive ductal carcinoma  | positive      | 95            | negative      | 0             | 1           | Primary              |
| 201706615        | mucinous carcinoma         | positive      | 95            | positive      | 20            | 0           | Primary              |
| 201706679        | invasive ductal carcinoma  | negative      | 0             | negative      | 0             | 0           | Primary              |
| 201706680        | invasive ductal carcinoma  | positive      | 95            | positive      | 40            | 0           | Primary              |
| 201706851        | invasive ductal carcinoma  | positive      | 98            | positive      | 98            | 0           | Primary              |
| 201706853        | invasive ductal carcinoma  | positive      | 95            | positive      | 60            | 1           | Primary              |
| 201706985        | invasive ductal carcinoma  | negative      | 0             | negative      | 0             | 1           | Primary              |
| 201706987        | invasive ductal carcinoma  | positive      | 98            | positive      | 98            | 2           | Primary              |
| 201706988        | invasive ductal carcinoma  | positive      | 95            | negative      | 0             | 1           | Primary              |
| 201706989        | invasive ductal carcinoma  | positive      | 98            | positive      | 75            | None        | Primary              |
| 201707130        | invasive ductal carcinoma  | negative      | 0             | negative      | 0             | 0           | Primary              |
| 201707131        | invasive ductal carcinoma  | negative      | 0             | positive      | 10            | 0           | Primary              |
| 201707133        | invasive ductal carcinoma  | positive      | 98            | negative      | 0             | 2           | Primary              |
| 201707323        | invasive ductal carcinoma  | positive      | 98            | positive      | 65            | 1           | Primary              |
| 201707324        | invasive ductal carcinoma  | positive      | 98            | positive      | 98            | 1           | Primary              |
| 201707325        | invasive ductal carcinoma  | positive      | 98            | None          | None          | 1           | Primary              |
| 201707359        | invasive ductal carcinoma  | positive      | 99            | positive      | 20            | 0           | Primary              |
| 201707413        | invasive ductal carcinoma  | positive      | 80            | positive      | 99            | 0           | Primary              |
| 201707414        | invasive ductal carcinoma  | positive      | 99            | positive      | 45            | 3           | Primary              |
| 201707597        | invasive ductal carcinoma  | positive      | 98            | positive      | 98            | 1           | Primary              |
| 201707601        | invasive ductal carcinoma  | positive      | 20            | negative      | 0             | 3           | Primary              |
| 201707603        | invasive ductal carcinoma  | positive      | 98            | positive      | 3             | 1           | Primary              |
| 201707657        | invasive ductal carcinoma  | positive      | 95            | negative      | 0             | 0           | Primary              |
| 201707792        | invasive ductal carcinoma  | positive      | 95            | positive      | 5             | 3           | Primary              |
| 201707805        | invasive ductal carcinoma  | negative      | 0             | negative      | 0             | 3           | Primary              |
| 201707806        | invasive ductal carcinoma  | positive      | 98            | negative      | 0             | 2           | Primary              |
| 201707983        | invasive ductal carcinoma  | positive      | 60            | negative      | 0             | 0           | Primary              |
| 201707987        | invasive ductal carcinoma  | negative      | 0             | negative      | 0             | 2           | Primary              |
| 201707989        | invasive ductal carcinoma  | positive      | 98            | positive      | 15            | 2           | Primary              |
| 201708080        | invasive lobular carcinoma | positive      | 98            | positive      | 5             | 0           | Primary              |
| 201708165        | invasive ductal carcinoma  | positive      | 98            | positive      | 95            | 3           | Primary              |

| Pathology_Number | Diagnosis                  | ER positivity | ER percentage | PR positivity | PR percentage | Her-2 score | Primary or Recurrent |
|------------------|----------------------------|---------------|---------------|---------------|---------------|-------------|----------------------|
| 201708191        | invasive ductal carcinoma  | positive      | 70            | negative      | 0             | 0           | Primary              |
| 201708192        | invasive ductal carcinoma  | positive      | 30            | negative      | 0             | 3           | Primary              |
| 201708193        | invasive ductal carcinoma  | negative      | 0             | negative      | 0             | 0           | Primary              |
| 201708341        | invasive ductal carcinoma  | positive      | 10            | negative      | 0             | 0           | Primary              |
| 201708343        | invasive ductal carcinoma  | positive      | 98            | positive      | 2             | 0           | Primary              |
| 201708347        | invasive ductal carcinoma  | positive      | 30            | positive      | 15            | 2           | Primary              |
| 201708487        | invasive ductal carcinoma  | positive      | 98            | positive      | 80            | 1           | Primary              |
| 201708492        | invasive ductal carcinoma  | positive      | 98            | positive      | 10            | 3           | Primary              |
| 201708521        | invasive ductal carcinoma  | positive      | 20            | positive      | 1             | 2           | Primary              |
| 201708550        | invasive ductal carcinoma  | positive      | 99            | positive      | 99            | 0           | Primary              |
| 201708552        | invasive ductal carcinoma  | positive      | 90            | positive      | 5             | 1           | Primary              |
| 201708553        | invasive ductal carcinoma  | positive      | 99            | positive      | 70            | 1           | Primary              |
| 201708656        | invasive ductal carcinoma  | positive      | 40            | negative      | 0             | 1           | Primary              |
| 201708658        | invasive ductal carcinoma  | positive      | 95            | positive      | 98            | 0           | Primary              |
| 201708735        | invasive ductal carcinoma  | positive      | 90            | positive      | 98            | 0           | Primary              |
| 201708736        | invasive ductal carcinoma  | positive      | 98            | positive      | 85            | 0           | Primary              |
| 201708738        | invasive ductal carcinoma  | positive      | 95            | positive      | 20            | 1           | Primary              |
| 201708858        | invasive ductal carcinoma  | positive      | 98            | positive      | 2             | 1           | Primary              |
| 201708859        | invasive ductal carcinoma  | negative      | 0             | negative      | 0             | 3           | Primary              |
| 201708932        | invasive ductal carcinoma  | positive      | 45            | negative      | 0             | 3           | Primary              |
| 201709084        | invasive ductal carcinoma  | positive      | 98            | positive      | 1             | 0           | Primary              |
| 201709176        | invasive ductal carcinoma  | positive      | 95            | positive      | 1             | 0           | Primary              |
| 201709177        | invasive ductal carcinoma  | negative      | 0             | negative      | 0             | 0           | Primary              |
| 201709181        | invasive ductal carcinoma  | positive      | 95            | positive      | 99            | 0           | Primary              |
| 201709182        | invasive ductal carcinoma  | positive      | 2             | negative      | 0             | 0           | Primary              |
| 201709379        | invasive ductal carcinoma  | negative      | 0             | negative      | 0             | 0           | Primary              |
| 201709381        | invasive mammary carcinoma | positive      | 98            | positive      | 95            | 0           | Primary              |
| 201709382        | invasive ductal carcinoma  | positive      | 70            | positive      | 60            | 3           | Primary              |
| 201709388        | invasive ductal carcinoma  | negative      | 0             | negative      | 0             | 2           | Primary              |
| 201709389        | invasive lobular carcinoma | positive      | 98            | positive      | 40            | 0           | Primary              |
| 201709399        | invasive ductal carcinoma  | positive      | 98            | positive      | 10            | 1           | Primary              |
| 201709544        | invasive mammary carcinoma | positive      | 98            | positive      | 98            | 0           | Primary              |
| 201709547        | invasive ductal carcinoma  | positive      | 8             | negative      | 0             | 3           | Primary              |
| 201709548        | invasive ductal carcinoma  | negative      | 0             | negative      | 0             | 3           | Primary              |
| 201709550        | invasive ductal carcinoma  | positive      | 98            | positive      | 70            | 2           | Primary              |
| 201709596        | invasive ductal carcinoma  | negative      | 0             | negative      | 0             | 0           | Primary              |
| 201709672        | invasive ductal carcinoma  | positive      | 95            | positive      | 60            | 3           | Primary              |
| 201709673        | invasive ductal carcinoma  | positive      | 98            | positive      | 55            | 1           | Primary              |

| Pathology_Number | Diagnosis                  | ER positivity | ER percentage | PR positivity | PR percentage | Her-2 score | Primary or Recurrent |
|------------------|----------------------------|---------------|---------------|---------------|---------------|-------------|----------------------|
| 201709674        | invasive ductal carcinoma  | positive      | 98            | positive      | 98            | 1           | Primary              |
| 201709769        | invasive ductal carcinoma  | positive      | 95            | positive      | 95            | 2           | Primary              |
| 201709770        | invasive ductal carcinoma  | positive      | 98            | positive      | 30            | 2           | Primary              |
| 201709771        | invasive ductal carcinoma  | positive      | 98            | positive      | 5             | 3           | Primary              |
| 201709846        | invasive ductal carcinoma  | positive      | 95            | positive      | 80            | 2           | Primary              |
| 201709847        | invasive ductal carcinoma  | positive      | 40            | positive      | 10            | 2           | Primary              |
| 201709848        | invasive ductal carcinoma  | positive      | 99            | positive      | 20            | 2           | Primary              |
| 201709961        | invasive ductal carcinoma  | positive      | 5             | negative      | 0             | 3           | Primary              |
| 201709962        | invasive mammary carcinoma | positive      | 98            | positive      | 90            | 2           | Primary              |
| 201709997        | invasive ductal carcinoma  | positive      | 95            | positive      | 70            | 0           | Primary              |
| 201710056        | invasive ductal carcinoma  | positive      | 98            | positive      | 90            | 1           | Primary              |
| 201710339        | invasive ductal carcinoma  | positive      | 65            | negative      | 0             | 3           | Primary              |
| 201710378        | invasive ductal carcinoma  | positive      | 30            | negative      | 0             | 3           | Primary              |
| 201710379        | invasive ductal carcinoma  | positive      | 98            | positive      | 20            | 1           | Primary              |
| 201710521        | invasive ductal carcinoma  | positive      | 80            | positive      | 10            | 3           | Primary              |
| 201710745        | invasive ductal carcinoma  | positive      | 98            | positive      | 15            | 2           | Primary              |
| 201710747        | invasive ductal carcinoma  | negative      | 0             | negative      | 0             | 1           | Primary              |
| 201710752        | invasive lobular carcinoma | positive      | 98            | positive      | 2             | 1           | Primary              |
| 201710753        | invasive lobular carcinoma | positive      | 95            | positive      | 70            | 2           | Primary              |
| 201710861        | invasive ductal carcinoma  | positive      | 35            | negative      | 0             | 2           | Primary              |
| 201710862        | invasive ductal carcinoma  | positive      | 99            | positive      | 35            | 2           | Primary              |
| 201710864        | invasive ductal carcinoma  | positive      | 99            | positive      | 95            | 0           | Primary              |
| 201710974        | invasive mammary carcinoma | positive      | 98            | positive      | 98            | 2           | Primary              |
| 201711077        | invasive ductal carcinoma  | positive      | 98            | negative      | 0             | 1           | Primary              |
| 201711078        | mucinous carcinoma         | positive      | 99            | positive      | 85            | 1           | Primary              |
| 201711443        | invasive ductal carcinoma  | positive      | 98            | positive      | 80            | 2           | Primary              |
| 201711579        | invasive ductal carcinoma  | negative      | 0             | negative      | 0             | 0           | Primary              |
| 201711580        | invasive ductal carcinoma  | positive      | 98            | negative      | 0             | 0           | Primary              |
| 201711589        | invasive ductal carcinoma  | positive      | 98            | positive      | 90            | 2           | Primary              |
| 201711703        | invasive ductal carcinoma  | positive      | 80            | positive      | 10            | 3           | Primary              |
| 201711710        | invasive ductal carcinoma  | positive      | 95            | negative      | 0             | 2           | Primary              |
| 201711711        | invasive ductal carcinoma  | negative      | 0             | positive      | 35            | 3           | Primary              |
| 201711953        | invasive ductal carcinoma  | negative      | 0             | negative      | 0             | 2           | Primary              |
| 201712005        | invasive ductal carcinoma  | negative      | 0             | negative      | 0             | 3           | Primary              |
| 201712006        | invasive ductal carcinoma  | positive      | 65            | positive      | 5             | 3           | Primary              |
| 201712061        | invasive ductal carcinoma  | positive      | 90            | positive      | 90            | 2           | Primary              |
| 201712063        | invasive ductal carcinoma  | positive      | 98            | negative      | 0             | 2           | Primary              |
| 201712179        | invasive lobular carcinoma | positive      | 98            | positive      | 20            | 1           | Primary              |

| Pathology_Number | Diagnosis                             | ER positivity | ER percentage | PR positivity | PR percentage | Her-2 score | Primary or Recurrent |
|------------------|---------------------------------------|---------------|---------------|---------------|---------------|-------------|----------------------|
| 201712180        | invasive ductal carcinoma             | positive      | 98            | positive      | 3             | 2           | Primary              |
| 201712273        | invasive ductal carcinoma             | positive      | 95            | positive      | 80            | 1           | Primary              |
| 201712371        | invasive ductal carcinoma             | positive      | 30            | negative      | 0             | 3           | Primary              |
| 201712418        | invasive ductal carcinoma             | positive      | 98            | positive      | 90            | 0           | Primary              |
| 201712477        | invasive ductal carcinoma             | positive      | 98            | positive      | 10            | 1           | Primary              |
| 201712630        | invasive lobular carcinoma            | positive      | 98            | positive      | 5             | 1           | Primary              |
| 201712649        | invasive ductal carcinoma             | positive      | 15            | positive      | 5             | 1           | Primary              |
| 201712893        | invasive ductal carcinoma             | positive      | 98            | positive      | 98            | 2           | Primary              |
| 201712942        | invasive ductal carcinoma             | positive      | 98            | positive      | 65            | 0           | Primary              |
| 201712943        | invasive ductal carcinoma             | positive      | 90            | positive      | 30            | 1           | Primary              |
| 201712945        | invasive ductal carcinoma             | positive      | 65            | positive      | 65            | 2           | Primary              |
| 201712946        | invasive ductal carcinoma             | positive      | 98            | positive      | 98            | 1           | Primary              |
| 201713139        | invasive mammary carcinoma            | positive      | 98            | positive      | 98            | 1           | Primary              |
| 201713140        | invasive ductal carcinoma             | positive      | 70            | positive      | 98            | 2           | Primary              |
| 201713141        | mucinous carcinoma                    | positive      | 98            | positive      | 98            | 2           | Primary              |
| 201713142        | invasive mammary carcinoma            | positive      | 98            | positive      | 98            | 1           | Primary              |
| 201713213        | invasive ductal carcinoma             | positive      | 85            | positive      | 70            | 1           | Primary              |
| 201713258        | invasive ductal carcinoma             | positive      | 98            | positive      | 40            | 2           | Primary              |
| 201713260        | invasive ductal carcinoma             | positive      | 98            | positive      | 90            | 2           | Primary              |
| 201713407        | invasive ductal carcinoma             | positive      | 95            | positive      | 30            | 1           | Primary              |
| 201713451        | invasive ductal carcinoma             | negative      | 0             | negative      | 0             | 3           | Primary              |
| 201713610        | invasive ductal carcinoma             | None          | None          | None          | None          | None        | Primary              |
| 201713669        | invasive ductal carcinoma             | positive      | 99            | positive      | 45            | 3           | Primary              |
| 201713670        | invasive ductal carcinoma             | negative      | 0             | negative      | 0             | 3           | Primary              |
| 201713984        | invasive ductal carcinoma             | positive      | 98            | positive      | 98            | 0           | Primary              |
| 201713986        | invasive ductal carcinoma             | positive      | 45            | positive      | 60            | 3           | Primary              |
| 201713987        | invasive ductal carcinoma             | positive      | 98            | positive      | 98            | 2           | Primary              |
| 201713988        | invasive carcinoma of no special type | positive      | 98            | positive      | 5             | 0           | Primary              |
| 201714077        | invasive ductal carcinoma             | negative      | 0             | positive      | 15            | 2           | Primary              |
| 201714079        | invasive ductal carcinoma             | positive      | 98            | positive      | 40            | 1           | Primary              |
| 201714147        | invasive ductal carcinoma             | positive      | 98            | positive      | 98            | 2           | Primary              |
| 201714149        | invasive ductal carcinoma             | positive      | 90            | positive      | 98            | 2           | Primary              |
| 201714336        | invasive ductal carcinoma             | positive      | 95            | positive      | 60            | 0           | Primary              |
| 201714398        | invasive ductal carcinoma             | positive      | 95            | positive      | 30            | 3           | Primary              |
| 201714399        | invasive ductal carcinoma             | negative      | 0             | negative      | 0             | 0           | Primary              |
| 201714400        | invasive ductal carcinoma             | negative      | 0             | positive      | 3             | 0           | Primary              |
| 201714401        | invasive ductal carcinoma             | positive      | 15            | negative      | 0             | 3           | Primary              |

| Pathology_Number | Diagnosis                             | ER positivity | ER percentage | PR positivity | PR percentage | Her-2 score | Primary or Recurrent |
|------------------|---------------------------------------|---------------|---------------|---------------|---------------|-------------|----------------------|
| 201714505        | invasive ductal carcinoma             | positive      | 98            | negative      | 0             | 2           | Primary              |
| 201714511        | invasive mammary carcinoma            | positive      | 98            | positive      | 95            | 2           | Primary              |
| 201714512        | invasive ductal carcinoma             | positive      | 98            | positive      | 2             | 0           | Primary              |
| 201714591        | mucinous carcinoma                    | positive      | 80            | positive      | 90            | 2           | Primary              |
| 201714592        | invasive ductal carcinoma             | positive      | 1             | positive      | 2             | 2           | Primary              |
| 201714643        | invasive ductal carcinoma             | positive      | 99            | positive      | 95            | 2           | Primary              |
| 201714789        | invasive mammary carcinoma            | positive      | 98            | positive      | 55            | 2           | Primary              |
| 201714973        | invasive carcinoma of no special type | positive      | 98            | positive      | 70            | 2           | Primary              |
| 201714974        | invasive carcinoma of no special type | positive      | 98            | positive      | 90            | 1           | Primary              |
| 201715130        | invasive ductal carcinoma             | positive      | 98            | positive      | 70            | 2           | Primary              |
| 201715132        | invasive ductal carcinoma             | positive      | 98            | negative      | 0             | 3           | Primary              |
| 201715133        | invasive ductal carcinoma             | positive      | 15            | negative      | 0             | 3           | Primary              |
| 201715354        | invasive ductal carcinoma             | positive      | 99            | positive      | 95            | 1           | Primary              |
| 201715365        | invasive ductal carcinoma             | positive      | 98            | positive      | 85            | 0           | Primary              |
| 201715367        | invasive ductal carcinoma             | positive      | 98            | negative      | 0             | 3           | Primary              |
| 201715368        | invasive ductal carcinoma             | positive      | 95            | positive      | 98            | 2           | Primary              |
| 201715429        | invasive ductal carcinoma             | positive      | 85            | positive      | 15            | 3           | Primary              |
| 201715597        | invasive carcinoma of no special type | positive      | 98            | positive      | 98            | 1           | Primary              |
| 201715598        | invasive carcinoma of no special type | positive      | 98            | None          | None          | 1           | Primary              |
| 201715600        | invasive carcinoma of no special type | positive      | 98            | positive      | 35            | 1           | Primary              |
| 201715722        | invasive ductal carcinoma             | positive      | 99            | positive      | 30            | 2           | Primary              |
| 201715723        | invasive ductal carcinoma             | positive      | 98            | positive      | 6             | 1           | Primary              |
| 201715724        | invasive ductal carcinoma             | positive      | 99            | positive      | 85            | 2           | Primary              |
| 201715814        | invasive carcinoma of no special type | negative      | 0             | negative      | 0             | 2           | Primary              |
| 201715822        | metaplastic carcinoma                 | negative      | 0             | negative      | 0             | 0           | Primary              |
| 201715909        | invasive ductal carcinoma             | None          | None          | None          | None          | None        | Primary              |
| 201716102        | invasive carcinoma of no special type | negative      | 0             | negative      | 0             | 3           | Primary              |
| 201716135        | invasive ductal carcinoma             | positive      | 60            | positive      | 80            | 3           | Primary              |
| 201716170        | invasive ductal carcinoma             | positive      | 98            | positive      | 10            | 2           | Recurrent            |
| 201716330        | invasive lobular carcinoma            | positive      | 95            | positive      | 20            | 0           | Primary              |
| 201716369        | mucinous carcinoma                    | positive      | 98            | positive      | 98            | 0           | Primary              |
| 201716372        | invasive carcinoma of no special type | positive      | 98            | positive      | 75            | 2           | Primary              |
| 201716378        | invasive lobular carcinoma            | positive      | 80            | positive      | 5             | 0           | Primary              |
| 201716466        | mucinous carcinoma                    | positive      | 99            | positive      | 15            | 1           | Primary              |

| Pathology_Number | Diagnosis                             | ER positivity | ER percentage | PR positivity | PR percentage | Her-2 score | Primary or Recurrent |
|------------------|---------------------------------------|---------------|---------------|---------------|---------------|-------------|----------------------|
| 201716666        | invasive ductal carcinoma             | positive      | 98            | negative      | 0             | 2           | Primary              |
| 201716704        | invasive carcinoma of no special type | negative      | 0             | negative      | 0             | 3           | Primary              |
| 201716705        | invasive ductal carcinoma             | positive      | 98            | positive      | 95            | 2           | Primary              |
| 201716710        | invasive carcinoma of no special type | positive      | 98            | negative      | 0             | 1           | Primary              |
| 201716711        | invasive carcinoma of no special type | negative      | 0             | negative      | 0             | 1           | Primary              |
| 201716831        | invasive carcinoma of no special type | positive      | 98            | positive      | 80            | 2           | Primary              |
| 201716832        | invasive carcinoma of no special type | positive      | 98            | positive      | 98            | 2           | Primary              |
| 201716927        | invasive ductal carcinoma             | positive      | 95            | positive      | 85            | 1           | Primary              |
| 201716929        | invasive ductal carcinoma             | positive      | 95            | positive      | 70            | 2           | Primary              |
| 201716930        | invasive ductal carcinoma             | positive      | 99            | positive      | 1             | 3           | Primary              |
| 201717023        | invasive carcinoma of no special type | positive      | 95            | positive      | 90            | 1           | Primary              |
| 201717025        | invasive carcinoma of no special type | positive      | 95            | positive      | 95            | 0           | Primary              |
| 201717034        | invasive carcinoma of no special type | positive      | 98            | positive      | 20            | 0           | Primary              |
| 201717047        | invasive carcinoma of no special type | positive      | 98            | positive      | 98            | 2           | Primary              |
| 201717138        | invasive carcinoma of no special type | positive      | 20            | negative      | 0             | 3           | Primary              |
| 201717276        | invasive carcinoma of no special type | positive      | 10            | negative      | 0             | 3           | Primary              |
| 201717277        | invasive carcinoma of no special type | negative      | 0             | negative      | 0             | 3           | Primary              |
| 201717279        | invasive carcinoma of no special type | negative      | 0             | negative      | 0             | 3           | Primary              |
| 201717282        | invasive carcinoma of no special type | positive      | 98            | negative      | 0             | 1           | Primary              |
| 201717283        | invasive carcinoma of no special type | positive      | 95            | positive      | 98            | 0           | Primary              |
| 201717455        | invasive ductal carcinoma             | positive      | 90            | positive      | 98            | 0           | Primary              |
| 201717456        | invasive ductal carcinoma             | negative      | 0             | negative      | 0             | 0           | Primary              |
| 201717499        | invasive carcinoma of no special type | positive      | 95            | positive      | 55            | 2           | Primary              |
| 201717622        | invasive carcinoma of no special type | positive      | 98            | positive      | 30            | 2           | Primary              |
| 201717627        | invasive carcinoma of no special type | positive      | 98            | positive      | 80            | 2           | Primary              |
| 201717841        | invasive carcinoma of no special type | negative      | 0             | negative      | 0             | 2           | Primary              |
| 201717842        | invasive carcinoma of no special type | positive      | 98            | positive      | 10            | 3           | Primary              |

| Pathology_Number | Diagnosis                             | ER positivity | ER percentage | PR positivity | PR percentage | Her-2 score | Primary or Recurrent |
|------------------|---------------------------------------|---------------|---------------|---------------|---------------|-------------|----------------------|
| 201717843        | invasive carcinoma of no special type | positive      | 98            | positive      | 5             | 2           | Primary              |
| 201717844        | invasive carcinoma of no special type | negative      | 0             | negative      | 0             | 1           | Primary              |
| 201717846        | invasive carcinoma of no special type | positive      | 15            | negative      | 0             | 3           | Primary              |
| 201717855        | invasive ductal carcinoma             | positive      | 99            | positive      | 90            | 1           | Primary              |
| 201717948        | invasive ductal carcinoma             | positive      | 80            | positive      | 55            | 2           | Primary              |
| 201717950        | invasive ductal carcinoma             | negative      | 0             | negative      | 0             | 2           | Primary              |
| 201717952        | encapsulated papillary carcinoma      | positive      | 99            | positive      | 99            | None        | Primary              |
| 201718050        | invasive carcinoma of no special type | positive      | 98            | positive      | 98            | 2           | Primary              |
| 201718052        | invasive carcinoma of no special type | negative      | 0             | negative      | 0             | 2           | Primary              |
| 201718150        | invasive ductal carcinoma             | positive      | 30            | negative      | 0             | 0           | Primary              |
| 201718178        | invasive lobular carcinoma            | positive      | 95            | positive      | 20            | 2           | Primary              |
| 201718179        | invasive ductal carcinoma             | positive      | 95            | positive      | 99            | 1           | Primary              |
| 201718299        | invasive ductal carcinoma             | positive      | 98            | positive      | 95            | 0           | Primary              |
| 201718308        | invasive carcinoma of no special type | positive      | 3             | negative      | 0             | 0           | Primary              |
| 201718310        | invasive carcinoma of no special type | positive      | 70            | positive      | 40            | 1           | Primary              |
| 201718311        | invasive carcinoma of no special type | positive      | 65            | positive      | 20            | 2           | Primary              |
| 201718362        | invasive ductal carcinoma             | positive      | 98            | positive      | 95            | 1           | Primary              |
| 201718591        | invasive carcinoma of no special type | positive      | 98            | positive      | 40            | 2           | Primary              |
| 201718723        | invasive carcinoma of no special type | positive      | 90            | positive      | 95            | 2           | Primary              |
| 201718724        | invasive carcinoma of no special type | negative      | 0             | negative      | 0             | 2           | Primary              |
| 201718928        | invasive carcinoma of no special type | negative      | 0             | negative      | 0             | 2           | Primary              |
| 201719020        | invasive carcinoma of no special type | positive      | 98            | positive      | 98            | 2           | Primary              |
| 201719122        | invasive carcinoma of no special type | negative      | 0             | negative      | 0             | 0           | Primary              |
| 201719124        | invasive ductal carcinoma             | negative      | 0             | negative      | 0             | 0           | Primary              |
| 201719165        | invasive ductal carcinoma             | positive      | 65            | negative      | 0             | 1           | Primary              |
| 201719171        | mucinous carcinoma                    | positive      | 95            | positive      | 70            | 2           | Primary              |
| 201719172        | invasive carcinoma of no special type | positive      | 99            | positive      | 60            | 0           | Primary              |
| 201719333        | invasive carcinoma of no special type | negative      | 0             | negative      | 0             | 3           | Primary              |
| 201719336        | invasive carcinoma of no special type | negative      | 0             | negative      | 0             | 0           | Primary              |



| Pathology_Number | Diagnosis                             | ER positivity | ER percentage | PR positivity | PR percentage | Her-2 score | Primary or Recurrent |
|------------------|---------------------------------------|---------------|---------------|---------------|---------------|-------------|----------------------|
| 201719338        | invasive carcinoma of no special type | positive      | 10            | positive      | 10            | 3           | Primary              |
| 201719340        | invasive carcinoma of no special type | positive      | 80            | negative      | 0             | 1           | Primary              |
| 201719727        | invasive carcinoma of no special type | positive      | 2             | negative      | 0             | 0           | Primary              |
| 201719728        | invasive carcinoma of no special type | negative      | 0             | negative      | 0             | 2           | Primary              |
| 201719729        | invasive carcinoma of no special type | positive      | 7             | negative      | 0             | 3           | Primary              |
| 201719917        | invasive carcinoma of no special type | positive      | 98            | positive      | 98            | 0           | Primary              |
| 201719921        | invasive carcinoma of no special type | positive      | 98            | positive      | 55            | 2           | Primary              |
| 201719922        | invasive carcinoma of no special type | positive      | 90            | positive      | 95            | 2           | Primary              |
| 201720125        | invasive carcinoma of no special type | positive      | 98            | positive      | 70            | 2           | Primary              |
| 201720141        | invasive ductal carcinoma             | positive      | 99            | positive      | 80            | 1           | Primary              |
| 201720228        | invasive ductal carcinoma             | positive      | 95            | positive      | 2             | 0           | Primary              |
| 201720229        | invasive ductal carcinoma             | positive      | 95            | positive      | 40            | 1           | Primary              |
| 201720397        | invasive lobular carcinoma            | positive      | 95            | positive      | 20            | 0           | Primary              |
| 201720398        | invasive carcinoma of no special type | negative      | 0             | negative      | 0             | 0           | Primary              |
| 201720579        | invasive carcinoma of no special type | positive      | 98            | positive      | 98            | 2           | Primary              |
| 201720659        | invasive carcinoma of no special type | positive      | 20            | negative      | 0             | 3           | Primary              |
| 201720660        | invasive carcinoma of no special type | positive      | 98            | positive      | 60            | 2           | Primary              |
| 201720665        | invasive carcinoma of no special type | positive      | 98            | positive      | 98            | 2           | Primary              |
| 201720976        | invasive ductal carcinoma             | positive      | 85            | negative      | 0             | 2           | Primary              |
| 201720979        | mucinous carcinoma                    | positive      | 99            | positive      | 95            | 0           | Primary              |
| 201721113        | invasive carcinoma of no special type | positive      | 98            | positive      | 98            | 2           | Primary              |
| 201721115        | invasive lobular carcinoma            | positive      | 98            | positive      | 145           | 0           | Primary              |
| 201721116        | invasive carcinoma of no special type | positive      | 95            | positive      | 98            | 2           | Primary              |
| 201721122        | invasive carcinoma of no special type | positive      | 98            | positive      | 98            | 2           | Primary              |
| 201721318        | invasive carcinoma of no special type | positive      | 98            | positive      | 98            | 2           | Primary              |
| 201721321        | invasive carcinoma of no special type | positive      | 95            | positive      | 5             | 1           | Primary              |
| 201721410        | invasive ductal carcinoma             | positive      | 1             | positive      | 5             | 1           | Primary              |
| 201721411        | invasive carcinoma of no special type | positive      | 10            | negative      | 0             | 3           | Primary              |

| Pathology_Number | Diagnosis                             | ER positivity | ER percentage | PR positivity | PR percentage | Her-2 score | Primary or Recurrent |
|------------------|---------------------------------------|---------------|---------------|---------------|---------------|-------------|----------------------|
| 201721412        | invasive carcinoma of no special type | negative      | 0             | positive      | 5             | 1           | Primary              |
| 201721609        | invasive carcinoma of no special type | positive      | 98            | positive      | 80            | 2           | Primary              |
| 201721610        | invasive lobular carcinoma            | positive      | 98            | positive      | 98            | 1           | Primary              |
| 201721762        | invasive ductal carcinoma             | positive      | 98            | negative      | 0             | 0           | Primary              |
| 201721766        | invasive carcinoma of no special type | positive      | 98            | positive      | 95            | 3           | Primary              |
| 201722007        | invasive carcinoma of no special type | positive      | 98            | positive      | 98            | 2           | Primary              |
| 201722010        | invasive carcinoma of no special type | positive      | 20            | positive      | 10            | 3           | Primary              |
| 201722124        | invasive carcinoma of no special type | positive      | 90            | positive      | 30            | 1           | Primary              |
| 201722127        | invasive carcinoma of no special type | positive      | 85            | positive      | 95            | 0           | Primary              |
| 201722128        | invasive carcinoma of no special type | positive      | 95            | positive      | 99            | 2           | Primary              |
| 201722294        | invasive carcinoma of no special type | positive      | 98            | negative      | 0             | 2           | Primary              |
| 201722296        | invasive carcinoma of no special type | positive      | 95            | None          | None          | 2           | Primary              |
| 201722298        | invasive carcinoma of no special type | positive      | 98            | positive      | 90            | 2           | Primary              |
| 201722483        | invasive carcinoma of no special type | positive      | 90            | negative      | 0             | 2           | Primary              |
| 201722484        | invasive carcinoma of no special type | positive      | 98            | positive      | 95            | 2           | Primary              |
| 201722485        | invasive carcinoma of no special type | positive      | 95            | positive      | 98            | 2           | Primary              |
| 201722486        | invasive carcinoma of no special type | negative      | 0             | negative      | 0             | 2           | Primary              |
| 201722487        | invasive carcinoma of no special type | positive      | 90            | positive      | 35            | 3           | Primary              |
| 201722488        | invasive carcinoma of no special type | positive      | 98            | positive      | 98            | 2           | Primary              |
| 201722570        | invasive carcinoma of no special type | positive      | 95            | positive      | 5             | 2           | Primary              |
| 201722575        | invasive carcinoma of no special type | positive      | 20            | positive      | 5             | 3           | Primary              |
| 201722576        | invasive carcinoma of no special type | positive      | 95            | positive      | 70            | 2           | Primary              |
| 201722606        | mucinous carcinoma                    | positive      | 95            | positive      | 10            | 2           | Primary              |
| 201722739        | invasive carcinoma of no special type | positive      | 90            | positive      | 70            | 2           | Primary              |
| 201722855        | invasive carcinoma of no special type | positive      |               | positive      |               | 1           | Primary              |
| 201722977        | invasive carcinoma of no special type | negative      | 0             | negative      | 0             | 3           | Primary              |

| Pathology_Number | Diagnosis                             | ER positivity | ER percentage | PR positivity | PR percentage | Her-2 score | Primary or Recurrent |
|------------------|---------------------------------------|---------------|---------------|---------------|---------------|-------------|----------------------|
| 201722979        | invasive carcinoma of no special type | positive      | 98            | positive      | 98            | 2           | Primary              |
| 201722980        | invasive carcinoma of no special type | positive      | 98            | positive      | 2             | 2           | Primary              |
| 201723023        | invasive carcinoma of no special type | positive      | 90            | positive      | 2             | 3           | Primary              |
| 201723024        | invasive carcinoma of no special type | positive      | 95            | positive      | 15            | 2           | Primary              |
| 201723029        | invasive carcinoma of no special type | positive      | 95            | positive      | 20            | 0           | Primary              |
| 201723031        | invasive carcinoma of no special type | positive      | 95            | positive      | 98            | 2           | Primary              |
| 201723032        | invasive carcinoma of no special type | positive      | 98            | positive      | 98            | 2           | Primary              |
| 201723033        | invasive carcinoma of no special type | negative      | 0             | negative      | 0             | 0           | Primary              |
| 201723034        | invasive carcinoma of no special type | positive      | 90            | positive      | 25            | 2           | Primary              |
| 201723159        | invasive carcinoma of no special type | positive      | 95            | positive      | 1             | 3           | Primary              |
| 201723554        | invasive carcinoma of no special type | positive      | 90            | positive      | 5             | 2           | Primary              |
| 201723555        | invasive carcinoma of no special type | positive      | 85            | positive      | 2             | 2           | Primary              |
| 201723689        | invasive carcinoma of no special type | positive      | 98            | positive      | 30            | 2           | Primary              |
| 201723690        | invasive carcinoma of no special type | positive      | 98            | positive      | 90            | 2           | Primary              |
| 201723799        | mucinous carcinoma                    | positive      | 98            | positive      | 90            | 2           | Primary              |
| 201723801        | invasive lobular carcinoma            | positive      | 98            | positive      | 98            | 2           | Primary              |
| 201723802        | invasive carcinoma of no special type | positive      | 98            | positive      | 90            | 2           | Primary              |
| 201723890        | invasive carcinoma of no special type | positive      | 20            | negative      | 0             | 2           | Primary              |
| 201723891        | invasive carcinoma of no special type | positive      | 98            | positive      | 98            | 2           | Primary              |
| 201724236        | invasive carcinoma of no special type | positive      | 98            | positive      | 95            | 2           | Primary              |
| 201724569        | mucinous carcinoma                    | positive      | 98            | positive      | 40            | 2           | Primary              |
| 201724576        | invasive carcinoma of no special type | positive      | 98            | positive      | 80            | 2           | Primary              |
| 201724807        | invasive carcinoma of no special type | positive      | 80            | positive      | 40            | 1           | Primary              |
| 201724808        | invasive carcinoma of no special type | positive      | 95            | positive      | 5             | 1           | Primary              |
| 201724812        | invasive carcinoma of no special type | positive      | 98            | negative      | 0             | 2           | Primary              |
| 201724891        | invasive carcinoma of no special type | positive      | 98            | positive      | 95            | 1           | Primary              |

| Pathology_Number | Diagnosis                             | ER positivity | ER percentage | PR positivity | PR percentage | Her-2 score | Primary or Recurrent |
|------------------|---------------------------------------|---------------|---------------|---------------|---------------|-------------|----------------------|
| 201724893        | invasive carcinoma of no special type | negative      | 0             | negative      | 0             | 3           | Primary              |
| 201725041        | mucinous carcinoma                    | positive      | 98            | positive      | 80            | 2           | Primary              |
| 201725110        | invasive carcinoma of no special type | positive      | 70            | negative      | 0             | 1           | Primary              |
| 201725111        | invasive ductal carcinoma             | positive      |               | positive      |               | 0           | Primary              |
| 201725232        | invasive carcinoma of no special type | positive      | 98            | positive      | 3             | 2           | Primary              |
| 201725234        | invasive carcinoma of no special type | positive      | 98            | positive      | 95            | 2           | Primary              |
| 201725374        | metaplastic carcinoma                 | negative      | 0             | negative      | 0             | 2           | Primary              |
| 201725521        | invasive carcinoma of no special type | positive      | 98            | positive      | 40            | 2           | Primary              |
| 201725522        | invasive carcinoma of no special type | negative      | 0             | negative      | 0             | 3           | Primary              |
| 201725526        | invasive carcinoma of no special type | positive      | 98            | negative      | 0             | 2           | Primary              |
| 201725638        | invasive ductal carcinoma             | negative      | 0             | negative      | 0             | 0           | Primary              |
| 201725639        | invasive carcinoma of no special type | negative      | 0             | negative      | 0             | 2           | Primary              |
| 201725684        | invasive carcinoma of no special type | positive      | 98            | positive      | 20            | 2           | Primary              |
| 201725830        | invasive carcinoma of no special type | negative      | 0             | negative      | 0             | 3           | Primary              |
| 201725833        | invasive carcinoma of no special type | negative      | 0             | None          | None          | 3           | Primary              |
| 201725836        | invasive carcinoma of no special type | positive      | 80            | positive      | 90            | 2           | Primary              |
| 201725840        | invasive carcinoma of no special type | positive      | 98            | positive      | 85            | 2           | Primary              |
| 201725843        | invasive carcinoma of no special type | None          | None          | negative      | 0             | 3           | Primary              |
| 201725879        | invasive ductal carcinoma             | None          | None          | None          | None          | None        | Primary              |
| 201726030        | invasive carcinoma of no special type | positive      | 5             | negative      | 0             | 3           | Primary              |
| 201726034        | invasive carcinoma of no special type | positive      | 98            | positive      | 15            | 2           | Primary              |
| 201726093        | invasive carcinoma of no special type | negative      | 0             | negative      | 0             | 0           | Primary              |
| 201726094        | encapsulated papillary carcinoma      | positive      | 99            | positive      | 5             | 2           | Primary              |
| 201726096        | invasive carcinoma of no special type | positive      | 85            | positive      | 60            | 2           | Primary              |
| 201726102        | invasive carcinoma of no special type | positive      | 80            | negative      | 0             | 1           | Primary              |
| 201726103        | invasive carcinoma of no special type | positive      | 85            | positive      | 80            | 2           | Primary              |

| Pathology_Number | Diagnosis                             | ER positivity | ER percentage | PR positivity | PR percentage | Her-2 score | Primary or Recurrent |
|------------------|---------------------------------------|---------------|---------------|---------------|---------------|-------------|----------------------|
| 201726413        | invasive carcinoma of no special type | positive      | 99            | positive      | 90            | 1           | Primary              |
| 201726414        | invasive carcinoma of no special type | positive      | 99            | positive      | 90            | 2           | Primary              |
| 201726647        | invasive carcinoma of no special type | positive      | 95            | positive      |               | 0           | Primary              |
| 201726649        | invasive carcinoma of no special type | negative      | 0             | negative      | 0             | 3           | Primary              |
| 201726651        | invasive carcinoma of no special type | positive      | 98            | positive      | 80            | 1           | Primary              |
| 201726652        | invasive carcinoma of no special type | positive      | 98            | positive      | 98            | 1           | Primary              |
| 201726808        | invasive carcinoma of no special type | positive      | 3             | negative      | 0             | 3           | Primary              |
| 201726809        | invasive carcinoma of no special type | negative      | 0             | negative      | 0             | 3           | Primary              |
| 201726812        | invasive carcinoma of no special type | positive      | 85            | positive      | 90            | 2           | Primary              |
| 201726814        | invasive carcinoma of no special type | negative      | 0             | negative      | 0             | 2           | Primary              |
| 201727289        | invasive carcinoma of no special type | positive      | 99            | positive      | 15            | 2           | Primary              |
| 201727351        | invasive carcinoma of no special type | positive      | 95            | positive      | 90            | 0           | Primary              |
| 201727470        | invasive carcinoma of no special type | negative      | 0             | negative      | 0             | 1           | Primary              |
| 201727511        | invasive carcinoma of no special type | positive      | 98            | negative      | 0             | 1           | Primary              |
| 201727516        | metaplastic carcinoma                 | negative      | 0             | negative      | 0             | 0           | Primary              |
| 201727517        | invasive carcinoma of no special type | positive      | 98            | positive      | 40            | 1           | Primary              |
| 201727527        | invasive carcinoma of no special type | positive      | 98            | positive      | 98            | 2           | Primary              |
| 201727528        | invasive carcinoma of no special type | positive      | 90            | positive      | 30            | 0           | Primary              |
| 201728242        | invasive carcinoma of no special type | positive      | 98            | positive      | 98            | 2           | Primary              |
| 201728243        | invasive carcinoma of no special type | negative      | 0             | negative      | 0             | 1           | Primary              |
| 201728249        | invasive carcinoma of no special type | positive      | 90            | negative      | 0             | 3           | Primary              |
| 201728507        | invasive carcinoma of no special type | positive      | 98            | positive      | 98            | 2           | Primary              |
| 201728508        | invasive carcinoma of no special type | positive      | 98            | positive      | 55            | 2           | Primary              |
| 201728510        | invasive carcinoma of no special type | positive      | 98            | positive      | 98            | 2           | Primary              |
| 201728624        | invasive carcinoma of no special type | positive      | 90            | negative      | 0             | 2           | Primary              |

| Pathology_Number | Diagnosis                             | ER positivity | ER percentage | PR positivity | PR percentage | Her-2 score | Primary or Recurrent |
|------------------|---------------------------------------|---------------|---------------|---------------|---------------|-------------|----------------------|
| 201728626        | invasive carcinoma of no special type | positive      | 95            | positive      | 60            | 2           | Primary              |
| 201728725        | mucinous carcinoma                    | positive      | 98            | positive      | 60            | 1           | Primary              |
| 201728727        | invasive carcinoma of no special type | positive      | 98            | positive      | 98            | 1           | Primary              |
| 201728773        | invasive carcinoma of no special type | negative      | 0             | negative      | 0             | 3           | Primary              |
| 201728822        | invasive carcinoma of no special type | positive      | 70            | positive      | 30            | 3           | Primary              |
| 201729130        | invasive carcinoma of no special type | positive      |               | negative      | 0             | 0           | Primary              |
| 201729132        | invasive carcinoma of no special type | positive      | 98            | negative      | 0             | 2           | Primary              |
| 201729134        | invasive ductal carcinoma             | positive      | 98            | positive      | 90            | 0           | Primary              |
| 201729135        | invasive ductal carcinoma             | negative      | 0             | negative      | 0             | 3           | Primary              |
| 201729136        | invasive lobular carcinoma            | positive      | 90            | negative      | 0             | 0           | Primary              |
| 201729137        | invasive carcinoma of no special type | negative      | 0             | negative      | 0             | 0           | Primary              |
| 201729158        | invasive carcinoma of no special type | negative      | 0             | negative      | 0             | 3           | Primary              |
| 201729159        | invasive carcinoma of no special type | positive      | 35            | positive      | 30            | 2           | Primary              |
| 201729328        | invasive carcinoma of no special type | positive      | 98            | positive      | 98            | 0           | Primary              |
| 201729329        | invasive carcinoma of no special type | negative      | 0             | negative      | 0             | 0           | Primary              |
| 201729332        | invasive carcinoma of no special type | positive      | 98            | positive      | 65            | 0           | Primary              |
| 201729335        | invasive lobular carcinoma            | positive      | 98            | negative      | 0             | 2           | Primary              |
| 201729570        | invasive carcinoma of no special type | negative      | 0             | negative      | 0             | 0           | Primary              |
| 201729619        | invasive carcinoma of no special type | positive      | 95            | positive      | 95            | 2           | Primary              |
| 201729620        | invasive carcinoma of no special type | positive      | 95            | positive      | 10            | 1           | Primary              |
| 201729653        | invasive carcinoma of no special type | positive      | 98            | positive      | 55            | 0           | Primary              |
| 201729654        | invasive carcinoma of no special type | positive      | 95            | negative      | 0             | 0           | Primary              |
| 201729655        | invasive carcinoma of no special type | positive      | 95            | positive      | 85            | 2           | Primary              |
| 201729785        | invasive carcinoma of no special type | positive      | 98            | positive      | 85            | 0           | Primary              |
| 201729787        | invasive carcinoma of no special type | positive      | 80            | positive      | 90            | 3           | Primary              |
| 201729844        | invasive carcinoma of no special type | positive      | 98            | negative      | 0             | 0           | Primary              |

| Pathology_Number | Diagnosis                             | ER positivity | ER percentage | PR positivity | PR percentage | Her-2 score | Primary or Recurrent |
|------------------|---------------------------------------|---------------|---------------|---------------|---------------|-------------|----------------------|
| 201729845        | invasive carcinoma of no special type | negative      | 0             | negative      | 0             | 2           | Primary              |
| 201729991        | invasive lobular carcinoma            | positive      | 90            | positive      | 80            | 2           | Primary              |
| 201729993        | invasive carcinoma of no special type | negative      | 0             | negative      | 0             | 3           | Primary              |
| 201730035        | mucinous carcinoma                    | negative      | 0             | negative      | 0             | 0           | Primary              |
| 201730260        | invasive carcinoma of no special type | positive      | 90            | positive      | 90            | 3           | Primary              |
| 201730261        | invasive carcinoma of no special type | negative      | 0             | negative      | 0             | 3           | Primary              |
| 201730262        | invasive mammary carcinoma            | negative      | 0             | negative      | 0             | 2           | Primary              |
| 201730433        | invasive carcinoma of no special type | positive      | 99            | positive      | 60            | 1           | Primary              |
| 201730434        | invasive carcinoma of no special type | positive      | 99            | positive      | 99            | 0           | Primary              |
| 201730435        | invasive carcinoma of no special type | positive      | 98            | positive      | 95            | 2           | Primary              |
| 201730437        | invasive carcinoma of no special type | positive      | 95            | positive      | 95            | 2           | Primary              |
| 201730438        | invasive carcinoma of no special type | positive      | 95            | positive      | 80            | 2           | Primary              |
| 201730618        | invasive carcinoma of no special type | negative      | 0             | positive      | 2             | 1           | Primary              |
| 201730623        | invasive carcinoma of no special type | negative      | 0             | negative      | 0             | 3           | Primary              |
| 201730841        | invasive carcinoma of no special type | negative      | 0             | negative      | 0             | 3           | Primary              |
| 201730843        | invasive lobular carcinoma            | positive      | 98            | positive      | 20            | 0           | Primary              |
| 201730846        | invasive carcinoma of no special type | positive      | 99            | positive      | 99            | 2           | Primary              |
| 201731057        | invasive carcinoma of no special type | positive      | 99            | positive      | 99            | 1           | Primary              |
| 201731059        | mucinous carcinoma                    | positive      | 99            | positive      | 99            | 0           | Primary              |
| 201731300        | invasive carcinoma of no special type | positive      | 98            | negative      | 0             | 1           | Primary              |
| 201731343        | invasive carcinoma of no special type | negative      | 0             | negative      | 0             | 0           | Primary              |
| 201731344        | invasive carcinoma of no special type | negative      | 0             | negative      | 0             | 3           | Primary              |
| 201731363        | invasive carcinoma of no special type | positive      | 2             | negative      | 0             | 2           | Primary              |
| 201731577        | invasive carcinoma of no special type | positive      | 98            | positive      | 98            | 1           | Primary              |
| 201731580        | invasive carcinoma of no special type | negative      | 0             | negative      | 0             | 2           | Primary              |
| 201731867        | mucinous carcinoma                    | positive      | 80            | positive      | 95            | 1           | Primary              |
| 201731916        | invasive carcinoma of no special type | negative      | 0             | negative      | 0             | 1           | Primary              |

| Pathology_Number | Diagnosis                             | ER positivity | ER percentage | PR positivity | PR percentage | Her-2 score | Primary or Recurrent |
|------------------|---------------------------------------|---------------|---------------|---------------|---------------|-------------|----------------------|
| 201732074        | invasive carcinoma of no special type | positive      | 98            | positive      | 40            | 0           | Primary              |
| 201732127        | encapsulated papillary carcinoma      | positive      | 98            | positive      | 90            | None        | Primary              |
| 201732128        | invasive carcinoma of no special type | negative      | 0             | negative      | 0             | 0           | Primary              |
| 201732143        | invasive carcinoma of no special type | positive      | 95            | negative      | 0             | 0           | Primary              |
| 201732145        | invasive carcinoma of no special type | positive      | 98            | negative      | 0             | 2           | Primary              |
| 201732148        | invasive carcinoma of no special type | positive      | 98            | positive      | 55            | 0           | Primary              |
| 201732295        | invasive carcinoma of no special type | positive      | 98            | positive      | 85            | 0           | Primary              |
| 201732405        | invasive carcinoma of no special type | positive      | 95            | positive      | 1             | 2           | Primary              |
| 201732406        | invasive carcinoma of no special type | positive      | 95            | positive      | 80            | None        | Primary              |
| 201732525        | invasive mammary carcinoma            | negative      | 0             | negative      | 0             | 1           | Primary              |
| 201732526        | invasive carcinoma of no special type | positive      | 95            | positive      | 70            | 0           | Primary              |
| 201732527        | invasive carcinoma of no special type | negative      | 0             | negative      | 0             | 3           | Primary              |
| 201732528        | invasive carcinoma of no special type | negative      | 0             | None          | None          | 0           | Primary              |
| 201732531        | invasive carcinoma of no special type | positive      | 95            | positive      | 30            | 3           | Primary              |
| 201732600        | invasive carcinoma of no special type | positive      | 98            | positive      | 90            | 1           | Primary              |
| 201733368        | invasive carcinoma of no special type | positive      | 98            | positive      | 98            | 1           | Primary              |
| 201733369        | invasive carcinoma of no special type | positive      | 90            | negative      | 0             | 1           | Primary              |
| 201733371        | invasive lobular carcinoma            | positive      | 90            | positive      | 85            | 1           | Primary              |
| 201733415        | invasive carcinoma of no special type | positive      | 95            | negative      | 0             | 0           | Primary              |
| 201733416        | invasive carcinoma of no special type | negative      | 0             | negative      | 0             | 2           | Primary              |
| 201733471        | invasive carcinoma of no special type | positive      | 99            | positive      | 99            | 2           | Primary              |
| 201733601        | invasive carcinoma of no special type | positive      | 55            | positive      | 90            | 3           | Primary              |
| 201733602        | invasive carcinoma of no special type | positive      | 98            | positive      | 10            | 2           | Primary              |
| 201733636        | invasive carcinoma of no special type | positive      | 90            | positive      | 80            | 0           | Primary              |
| 201733695        | invasive carcinoma of no special type | positive      | 99            | positive      | 40            | 2           | Primary              |



| Pathology_Number | Diagnosis                             | ER positivity | ER percentage | PR positivity | PR percentage | Her-2 score | Primary or Recurrent |
|------------------|---------------------------------------|---------------|---------------|---------------|---------------|-------------|----------------------|
| 201733696        | invasive carcinoma of no special type | positive      | 95            | positive      | 85            | 2           | Primary              |
| 201733809        | invasive mammary carcinoma            | positive      | 98            | negative      | 0             | 0           | Primary              |
| 201733812        | invasive carcinoma of no special type | negative      | 0             | negative      | 0             | 2           | Primary              |
| 201733813        | invasive carcinoma of no special type | positive      | 98            | positive      | 98            | 1           | Primary              |
| 201733850        | invasive carcinoma of no special type | negative      | 0             | negative      | 0             | 0           | Primary              |
| 201733897        | mucinous carcinoma                    | positive      | 90            | positive      | 90            | 0           | Primary              |
| 201733898        | invasive carcinoma of no special type | positive      | 95            | positive      | 35            | 0           | Primary              |
| 201733899        | invasive carcinoma of no special type | positive      | 90            | positive      |               | 0           | Primary              |
| 201734046        | invasive carcinoma of no special type | positive      | 95            | positive      | 98            | 2           | Primary              |
| 201734049        | invasive carcinoma of no special type | positive      | 95            | positive      | 98            | 2           | Primary              |
| 201734221        | invasive ductal carcinoma             | negative      | 0             | negative      | 0             | 0           | Primary              |
| 201734378        | invasive lobular carcinoma            | positive      | 70            | positive      | 70            | 2           | Primary              |
| 201734570        | invasive carcinoma of no special type | negative      | 0             | negative      | 0             | 0           | Primary              |
| 201734572        | invasive carcinoma of no special type | positive      | 98            | positive      | 55            | 2           | Primary              |
| 201734573        | invasive carcinoma of no special type | positive      | 98            | positive      | 98            | 1           | Primary              |
| 201734670        | invasive carcinoma of no special type | negative      | 0             | negative      | 0             | 2           | Primary              |
| 201734807        | invasive carcinoma of no special type | positive      | 98            | positive      | 98            | 2           | Primary              |
| 201734809        | invasive carcinoma of no special type | positive      | 98            | positive      | 5             | 2           | Primary              |
| 201734810        | invasive carcinoma of no special type | positive      | 98            | positive      | 35            | 2           | Primary              |
| 201734857        | invasive carcinoma of no special type | positive      | 98            | negative      | 0             | 2           | Primary              |
| 201734868        | invasive lobular carcinoma            | positive      | 98            | positive      | 10            | 2           | Primary              |
| 201734869        | invasive carcinoma of no special type | positive      | 98            | positive      | 70            | 2           | Primary              |
| 201734870        | invasive carcinoma of no special type | positive      | 98            | positive      | 98            | 1           | Primary              |
| 201735013        | invasive lobular carcinoma            | positive      | 95            | positive      | 65            | 0           | Primary              |
| 201735014        | invasive carcinoma of no special type | negative      | 0             | negative      | 0             | 3           | Primary              |
| 201735073        | invasive carcinoma of no special type | positive      | 90            | positive      | 95            | 2           | Primary              |
| 201735229        | invasive ductal carcinoma             | negative      | 0             | negative      | 0             | 0           | Primary              |

| Pathology_Number | Diagnosis                             | ER positivity | ER percentage | PR positivity | PR percentage | Her-2 score | Primary or Recurrent |
|------------------|---------------------------------------|---------------|---------------|---------------|---------------|-------------|----------------------|
| 201735315        | invasive carcinoma of no special type | positive      | 55            | positive      | 70            | 3           | Primary              |
| 201735461        | invasive carcinoma of no special type | negative      | 0             | negative      | 0             | 0           | Primary              |
| 201735656        | invasive mammary carcinoma            | positive      | 98            | positive      | 85            | 2           | Primary              |
| 201735660        | invasive mammary carcinoma            | positive      | 98            | positive      | 90            | 2           | Primary              |
| 201736005        | invasive mammary carcinoma            | positive      | 95            | positive      | 98            | 2           | Primary              |
| 201736006        | invasive carcinoma of no special type | positive      | 98            | positive      | 8             | 3           | Primary              |
| 201736137        | invasive carcinoma of no special type | positive      | 70            | positive      | 40            | 2           | Primary              |
| 201736265        | invasive carcinoma of no special type | positive      | 95            | positive      | 45            | 0           | Primary              |
| 201736268        | invasive ductal carcinoma             | negative      | 0             | negative      | 0             | 3           | Primary              |
| 201736269        | invasive carcinoma of no special type | positive      | 98            | positive      | 98            | 0           | Primary              |
| 201736358        | invasive carcinoma of no special type | positive      | 98            | positive      | 95            | 1           | Primary              |
| 201736424        | invasive ductal carcinoma             | positive      | 98            | positive      | 85            | 0           | Primary              |
| 201736507        | invasive ductal carcinoma             | negative      | 0             | negative      | 0             | 3           | Primary              |
| 201736810        | invasive carcinoma of no special type | positive      | 99            | positive      | 20            | 0           | Primary              |
| 201736811        | mucinous carcinoma                    | positive      | 99            | positive      | 95            | 0           | Primary              |
| 201736814        | invasive carcinoma of no special type | negative      | 0             | negative      | 0             | 1           | Primary              |
| 201737019        | invasive carcinoma of no special type | positive      | 98            | negative      | 0             | 2           | Primary              |
| 201737038        | invasive lobular carcinoma            | positive      | 90            | positive      | 85            | 0           | Primary              |
| 201737241        | invasive carcinoma of no special type | positive      | 98            | positive      | 98            | 2           | Primary              |
| 201737462        | invasive carcinoma of no special type | positive      | 40            | positive      | 90            | 0           | Primary              |
| 201737464        | invasive carcinoma of no special type | positive      | 98            | positive      | 98            | 1           | Primary              |
| 201737519        | invasive carcinoma of no special type | positive      | 98            | positive      |               | 1           | Primary              |
| 201737572        | mucinous carcinoma                    | positive      | 95            | positive      | 70            | 1           | Primary              |
| 201737690        | invasive carcinoma of no special type | positive      | 95            | positive      | 10            | 0           | Primary              |
| 201737692        | invasive carcinoma of no special type | positive      | 95            | positive      | 90            | 0           | Primary              |
| 201737788        | invasive carcinoma of no special type | negative      | 0             | negative      | 0             | 1           | Primary              |
| 201737789        | invasive carcinoma of no special type | positive      | 98            | positive      | 3             | 0           | Primary              |
| 201737790        | invasive carcinoma of no special type | positive      | 99            | positive      | 99            | 1           | Primary              |

| Pathology_Number | Diagnosis                             | ER positivity | ER percentage | PR positivity | PR percentage | Her-2 score | Primary or Recurrent |
|------------------|---------------------------------------|---------------|---------------|---------------|---------------|-------------|----------------------|
| 201737791        | invasive carcinoma of no special type | negative      | 0             | negative      | 0             | 2           | Primary              |
| 201737792        | invasive carcinoma of no special type | negative      | 0             | negative      | 0             | 3           | Primary              |
| 201738251        | invasive carcinoma of no special type | positive      | 98            | None          | None          | 1           | Primary              |
| 201738252        | invasive carcinoma of no special type | positive      | 95            | positive      | 95            | 2           | Primary              |
| 201738254        | invasive carcinoma of no special type | negative      | 0             | negative      | 0             | 3           | Primary              |
| 201738256        | invasive carcinoma of no special type | negative      | 0             | negative      | 0             | 2           | Primary              |
| 201738258        | invasive lobular carcinoma            | positive      | 98            | positive      | 98            | 0           | Primary              |
| 201738479        | invasive carcinoma of no special type | positive      | 98            | positive      | 23            | 2           | Primary              |
| 201738482        | invasive carcinoma of no special type | positive      | 98            | positive      | 12            | 2           | Primary              |
| 201738541        | invasive carcinoma of no special type | negative      | 0             | negative      | 0             | 2           | Primary              |
| 201738708        | invasive carcinoma of no special type | positive      | 98            | positive      | 30            | 2           | Primary              |
| 201738709        | invasive carcinoma of no special type | positive      | 90            | positive      | 70            | 2           | Primary              |
| 201738712        | invasive carcinoma of no special type | negative      | 0             | negative      | 0             | 3           | Primary              |
| 201738752        | invasive ductal carcinoma             | positive      | 98            | positive      | 95            | 2           | Primary              |
| 201738759        | invasive ductal carcinoma             | negative      | 0             | negative      | 0             | 0           | Primary              |
| 201738891        | invasive carcinoma of no special type | positive      | 20            | negative      | 0             | 1           | Primary              |
| 201738895        | invasive carcinoma of no special type | positive      | 80            | positive      | 90            | 0           | Primary              |
| 201738897        | invasive mammary carcinoma            | positive      | 90            | positive      | 90            | 0           | Primary              |
| 201738946        | invasive carcinoma of no special type | positive      | 99            | positive      | 99            | 0           | Primary              |
| 201739443        | invasive carcinoma of no special type | positive      | 85            | positive      | 98            | 2           | Primary              |
| 201739445        | invasive carcinoma of no special type | positive      | 70            | positive      | 98            | 2           | Primary              |
| 201739446        | invasive carcinoma of no special type | positive      | 65            | positive      | 90            | 3           | Primary              |
| 201739451        | invasive carcinoma of no special type | positive      | 85            | positive      | 98            | 1           | Primary              |
| 201739666        | invasive carcinoma of no special type | positive      | 95            | positive      | 95            | 0           | Primary              |
| 201739668        | invasive carcinoma of no special type | positive      | 98            | positive      | 98            | 1           | Primary              |
| 201739710        | encapsulated papillary carcinoma      | positive      | 98            | positive      | 90            | 0           | Primary              |

| Pathology_Number | Diagnosis                             | ER positivity | ER percentage | PR positivity | PR percentage | Her-2 score | Primary or Recurrent |
|------------------|---------------------------------------|---------------|---------------|---------------|---------------|-------------|----------------------|
| 201739711        | invasive carcinoma of no special type | positive      | 98            | positive      | 75            | 2           | Primary              |
| 201739726        | invasive lobular carcinoma            | positive      | 95            | positive      | 15            | 1           | Primary              |
| 201739727        | invasive lobular carcinoma            | positive      | 98            | negative      | 0             | 0           | Primary              |
| 201739728        | invasive lobular carcinoma            | positive      | 98            | positive      | 98            | 0           | Primary              |
| 201739846        | invasive carcinoma of no special type | negative      | 0             | negative      | 0             | 0           | Primary              |
| 201739851        | invasive carcinoma of no special type | positive      | 98            | positive      | 98            | 2           | Primary              |
| 201739935        | invasive carcinoma of no special type | positive      | 98            | positive      | 3             | 2           | Primary              |
| 201739936        | invasive carcinoma of no special type | positive      | 90            | positive      | 5             | 2           | Primary              |
| 201740241        | invasive carcinoma of no special type | None          | None          | None          | None          | None        | Primary              |
| 201740253        | invasive carcinoma of no special type | positive      | 70            | positive      | 80            | 3           | Primary              |
| 201740363        | invasive carcinoma of no special type | negative      | 0             | negative      | 0             | 3           | Recurrent            |
| 201740364        | invasive carcinoma of no special type | negative      | 0             | negative      | 0             | 0           | Primary              |
| 201740367        | invasive carcinoma of no special type | negative      | 0             | negative      | 0             | 2           | Primary              |
| 201740368        | invasive carcinoma of no special type | negative      | 0             | negative      | 0             | 0           | Primary              |
| 201740369        | invasive carcinoma of no special type | negative      | 0             | negative      | 0             | 3           | Primary              |
| 201740370        | invasive carcinoma of no special type | negative      | 0             | negative      | 0             | 0           | Primary              |
| 201740735        | invasive carcinoma of no special type | positive      | 70            | positive      | 99            | 2           | Primary              |
| 201740751        | invasive carcinoma of no special type | negative      | 0             | negative      | 0             | 0           | Primary              |
| 201740893        | invasive lobular carcinoma            | positive      | 98            | positive      | 98            | 1           | Primary              |
| 201740897        | invasive carcinoma of no special type | positive      | 98            | negative      | 0             | 2           | Primary              |
| 201740989        | invasive carcinoma of no special type | positive      | 98            | positive      | 55            | 0           | Primary              |
| 201741067        | invasive carcinoma of no special type | positive      | 85            | positive      | 45            | 2           | Primary              |
| 201741068        | invasive lobular carcinoma            | positive      | 98            | positive      | 98            | 0           | Primary              |
| 201741072        | invasive carcinoma of no special type | positive      | 90            | positive      | 60            | 1           | Primary              |
| 201741074        | invasive carcinoma of no special type | positive      | 35            | positive      | 10            | 2           | Primary              |
| 201741328        | invasive carcinoma of no special type | positive      | 65            | positive      | 65            | 1           | Primary              |
| 201741627        | mucinous carcinoma                    | positive      | 98            | positive      | 98            | 0           | Primary              |

| Pathology_Number | Diagnosis                             | ER positivity | ER percentage | PR positivity | PR percentage | Her-2 score | Primary or Recurrent |
|------------------|---------------------------------------|---------------|---------------|---------------|---------------|-------------|----------------------|
| 201741740        | invasive carcinoma of no special type | negative      | 0             | negative      | 0             | 2           | Primary              |
| 201742501        | invasive carcinoma of no special type | positive      | 80            | positive      | 95            | 0           | Primary              |
| 201742502        | invasive carcinoma of no special type | negative      | 0             | negative      | 0             | 1           | Primary              |
| 201742503        | invasive carcinoma of no special type | positive      | 95            | positive      | 5             | 1           | Primary              |
| 201742504        | invasive carcinoma of no special type | negative      | 0             | negative      | 0             | 0           | Primary              |
| 201742506        | invasive carcinoma of no special type | positive      | 95            | positive      | 15            | 0           | Primary              |
| 201742640        | invasive carcinoma of no special type | negative      | 0             | negative      | 0             | 3           | Primary              |
| 201742641        | invasive carcinoma of no special type | positive      | 90            | positive      | 98            | 0           | Primary              |
| 201742842        | invasive carcinoma of no special type | negative      | 0             | negative      | 0             | 2           | Primary              |
| 201742843        | invasive carcinoma of no special type | positive      | 98            | positive      | 80            | 2           | Primary              |
| 201742919        | invasive carcinoma of no special type | positive      | 5             | negative      | 0             | 0           | Primary              |
| 201742920        | invasive carcinoma of no special type | negative      | 0             | negative      | 0             | 3           | Primary              |
| 201742922        | invasive carcinoma of no special type | positive      | 95            | positive      | 70            | 2           | Primary              |
| 201742923        | invasive carcinoma of no special type | positive      | 95            | positive      | 95            | 2           | Primary              |
| 201742924        | invasive lobular carcinoma            | positive      | 70            | positive      | 90            | 0           | Primary              |
| 201743063        | invasive carcinoma of no special type | positive      | 98            | positive      | 2             | 0           | Primary              |
| 201743070        | invasive carcinoma of no special type | positive      | 98            | positive      | 98            | 0           | Primary              |
| 201743164        | invasive carcinoma of no special type | positive      | 98            | positive      | 65            | 2           | Primary              |
| 201743299        | invasive carcinoma of no special type | positive      | 98            | positive      | 30            | 1           | Primary              |
| 201743303        | invasive ductal carcinoma             | positive      | 90            | positive      | 90            | 0           | Primary              |
| 201743305        | invasive carcinoma of no special type | negative      | 0             | negative      | 0             | 0           | Primary              |
| 201743361        | invasive carcinoma of no special type | negative      | 0             | negative      | 0             | 0           | Primary              |
| 201743880        | invasive carcinoma of no special type | positive      | 98            | positive      | 30            | 2           | Primary              |
| 201743881        | invasive carcinoma of no special type | positive      | 98            | positive      | 55            | 2           | Primary              |
| 201744465        | invasive carcinoma of no special type | negative      | 0             | negative      | 0             | 3           | Primary              |

| Pathology_Number | Diagnosis                             | ER positivity | ER percentage | PR positivity | PR percentage | Her-2 score | Primary or Recurrent |
|------------------|---------------------------------------|---------------|---------------|---------------|---------------|-------------|----------------------|
| 201744469        | invasive carcinoma of no special type | positive      | 95            | positive      | 98            | 1           | Primary              |
| 201744518        | metaplastic carcinoma                 | negative      | 0             | negative      | 0             | 0           | Primary              |
| 201744519        | invasive carcinoma of no special type | negative      | 0             | negative      | 0             | 0           | Primary              |
| 201744717        | invasive carcinoma of no special type | positive      | 98            | positive      | 90            | 2           | Primary              |
| 201744918        | invasive carcinoma of no special type | positive      | 95            | positive      | 40            | 1           | Primary              |
| 201744922        | invasive carcinoma of no special type | negative      | 0             | negative      | 0             | 0           | Primary              |
| 201744923        | invasive carcinoma of no special type | positive      | 90            | positive      | 35            | 0           | Primary              |
| 201745372        | invasive carcinoma of no special type | positive      | 95            | positive      | 85            | 2           | Primary              |
| 201745606        | invasive carcinoma of no special type | positive      | 98            | negative      | 0             | 2           | Primary              |
| 201745808        | invasive carcinoma of no special type | positive      | 98            | positive      | 2             | 0           | Primary              |
| 201745809        | invasive carcinoma of no special type | positive      | 90            | positive      | 90            | 0           | Primary              |
| 201745811        | invasive carcinoma of no special type | positive      | 98            | None          | None          | 1           | Primary              |
| 201745813        | invasive carcinoma of no special type | positive      | 98            | positive      | 90            | 1           | Primary              |
| 201747014        | invasive carcinoma of no special type | positive      | 98            | positive      | 70            | 2           | Primary              |
| 201747015        | invasive carcinoma of no special type | positive      | 98            | positive      | 98            | 1           | Primary              |
| 201747017        | invasive carcinoma of no special type | positive      | 60            | positive      | 40            | 0           | Primary              |
| 201747019        | invasive carcinoma of no special type | positive      | 95            | positive      | 90            | 0           | Primary              |
| 201747021        | invasive carcinoma of no special type | positive      | 98            | positive      | 95            | 0           | Primary              |
| 201747022        | invasive carcinoma of no special type | negative      | 0             | negative      | 0             | 1           | Primary              |
| 201747023        | invasive carcinoma of no special type | positive      | 95            | positive      | 98            | 0           | Primary              |
| 201747024        | invasive carcinoma of no special type | positive      | 98            | positive      | 95            | 2           | Primary              |
| 201747163        | invasive carcinoma of no special type | positive      | 95            | negative      | 0             | 3           | Primary              |
| 201747167        | invasive carcinoma of no special type | positive      | 98            | positive      | 40            | 2           | Primary              |
| 201747210        | invasive carcinoma of no special type | positive      | 99            | positive      | 95            | 0           | Primary              |
| 201747390        | invasive carcinoma of no special type | positive      | 60            | negative      | 0             | 3           | Primary              |

| Pathology_Number | Diagnosis                             | ER positivity | ER percentage | PR positivity | PR percentage | Her-2 score | Primary or Recurrent |
|------------------|---------------------------------------|---------------|---------------|---------------|---------------|-------------|----------------------|
| 201747394        | invasive carcinoma of no special type | positive      | 98            | negative      | 0             | 0           | Primary              |
| 201747397        | invasive carcinoma of no special type | positive      | 98            | positive      | 90            | 0           | Primary              |
| 201747466        | invasive carcinoma of no special type | positive      | 95            | positive      | 10            | 1           | Primary              |
| 201747470        | invasive carcinoma of no special type | negative      | 0             | negative      | 0             | 3           | Recurrent            |
| 201747605        | invasive carcinoma of no special type | positive      | 70            | positive      | 70            | 2           | Primary              |
| 201747608        | invasive carcinoma of no special type | negative      | 0             | negative      | 0             | 2           | Primary              |
| 201747610        | invasive carcinoma of no special type | positive      | 70            | positive      | 65            | 0           | Primary              |
| 201747614        | invasive carcinoma of no special type | positive      | 98            | positive      | 95            | 1           | Primary              |
| 201747635        | invasive carcinoma of no special type | positive      | 90            | negative      | 0             | 1           | Primary              |
| 201747639        | invasive carcinoma of no special type | positive      | 98            | positive      | 95            | 1           | Primary              |
| 201747814        | invasive carcinoma of no special type | positive      | 90            | positive      | 70            | 2           | Primary              |
| 201747818        | invasive carcinoma of no special type | positive      | 95            | negative      | 0             | 1           | Primary              |
| 201747820        | invasive carcinoma of no special type | negative      | 0             | negative      | 0             | 3           | Primary              |
| 201747821        | invasive carcinoma of no special type | positive      | 98            | positive      | 98            | 2           | Primary              |
| 201748046        | mucinous carcinoma                    | positive      | 98            | positive      | 2             | 0           | Primary              |
| 201748051        | invasive carcinoma of no special type | positive      | 98            | positive      | 98            | 0           | Primary              |
| 201748195        | invasive carcinoma of no special type | positive      | 95            | positive      | 5             | 2           | Primary              |
| 201748362        | invasive carcinoma of no special type | positive      | 98            | positive      | 97            | 1           | Primary              |
| 201748455        | invasive mammary carcinoma            | positive      | 98            | positive      | 1             | 1           | Primary              |
| 201748458        | invasive carcinoma of no special type | positive      | 98            | positive      | 98            | 2           | Primary              |
| 201748599        | invasive carcinoma of no special type | positive      | 98            | positive      | 1             | 2           | Primary              |
| 201748600        | invasive carcinoma of no special type | positive      | 80            | positive      | 5             | 2           | Primary              |
| 201748656        | invasive carcinoma of no special type | positive      | 90            | positive      | 10            | 0           | Primary              |
| 201748658        | invasive carcinoma of no special type | positive      | 95            | positive      | 85            | 0           | Primary              |
| 201748805        | invasive carcinoma of no special type | positive      | 90            | negative      | 0             | 2           | Primary              |

| Pathology_Number | Diagnosis                             | ER positivity | ER percentage | PR positivity | PR percentage | Her-2 score | Primary or Recurrent |
|------------------|---------------------------------------|---------------|---------------|---------------|---------------|-------------|----------------------|
| 201748819        | invasive carcinoma of no special type | positive      | 98            | positive      | 5             | 1           | Primary              |
| 201748821        | invasive mammary carcinoma            | negative      | 0             | negative      | 0             | 3           | Primary              |
| 201749083        | invasive carcinoma of no special type | positive      | 98            | positive      | 20            | 1           | Primary              |
| 201749281        | invasive carcinoma of no special type | positive      | 98            | positive      | 65            | 2           | Primary              |
| 201749390        | invasive carcinoma of no special type | positive      | 15            | negative      | 0             | 3           | Primary              |
| 201749550        | invasive carcinoma of no special type | negative      | 0             | negative      | 0             | 3           | Primary              |
| 201749552        | invasive carcinoma of no special type | positive      | 20            | negative      | 0             | 0           | Primary              |
| 201749553        | invasive mammary carcinoma            | negative      | 0             | negative      | 0             | 0           | Primary              |
| 201749556        | solid papillary carcinoma             | positive      | 98            | None          | None          | None        | Primary              |
| 201749623        | invasive carcinoma of no special type | positive      | 95            | positive      | 2             | 2           | Primary              |
| 201749624        | invasive carcinoma of no special type | positive      | 95            | positive      | 70            | 0           | Primary              |
| 201749625        | invasive carcinoma of no special type | positive      | 98            | positive      | 80            | 1           | Primary              |
| 201749756        | invasive lobular carcinoma            | positive      | 98            | positive      | 60            | 0           | Primary              |
| 201749758        | invasive carcinoma of no special type | positive      | 98            | positive      | 40            | 1           | Primary              |
| 201749779        | invasive carcinoma of no special type | positive      | 98            | positive      | 90            | 1           | Primary              |
| 201749780        | invasive carcinoma of no special type | positive      | 95            | positive      | 20            | None        | Primary              |
| 201749781        | invasive carcinoma of no special type | positive      | 98            | positive      | 15            | 2           | Primary              |
| 201749826        | invasive carcinoma of no special type | positive      | 98            | positive      | 70            | 2           | Primary              |
| 201749828        | invasive carcinoma of no special type | positive      | 80            | negative      | 0             | 0           | Primary              |
| 201749986        | invasive mammary carcinoma            | positive      | 98            | positive      | 65            | 0           | Primary              |
| 201750000        | invasive carcinoma of no special type | positive      | 98            | positive      | 98            | 1           | Primary              |
| 201750027        | invasive carcinoma of no special type | positive      | 90            | positive      | 98            | 0           | Primary              |
| 201750205        | invasive carcinoma of no special type | positive      | 90            | positive      | 90            | 2           | Primary              |
| 201750206        | invasive carcinoma of no special type | negative      | 0             | negative      | 0             | 1           | Primary              |
| 201750207        | invasive carcinoma of no special type | positive      | 95            | positive      | 75            | 2           | Primary              |
| 201750440        | invasive carcinoma of no special type | positive      | 90            | negative      | 0             | 1           | Primary              |



| Pathology_Number | Diagnosis                             | ER positivity | ER percentage | PR positivity | PR percentage | Her-2 score | Primary or Recurrent |
|------------------|---------------------------------------|---------------|---------------|---------------|---------------|-------------|----------------------|
| 201750441        | invasive carcinoma of no special type | positive      | 98            | positive      | 98            | 2           | Primary              |
| 201750666        | invasive lobular carcinoma            | positive      | 98            | positive      | 98            | 0           | Primary              |
| 201750692        | invasive carcinoma of no special type | positive      | 98            | positive      | 40            | 2           | Primary              |
| 201750697        | invasive lobular carcinoma            | positive      | 95            | positive      | 98            | 0           | Primary              |
| 201750887        | invasive carcinoma of no special type | positive      | 99            | positive      | 55            | 1           | Primary              |
| 201750899        | invasive carcinoma of no special type | negative      | 0             | negative      | 0             | 0           | Primary              |
| 201750901        | invasive carcinoma of no special type | positive      | 85            | positive      | 20            | 0           | Primary              |
| 201751145        | invasive carcinoma of no special type | positive      | 95            | positive      | 40            | 1           | Primary              |
| 201751159        | invasive carcinoma of no special type | positive      | 98            | positive      | 98            | 0           | Primary              |
| 201751321        | invasive carcinoma of no special type | positive      | 85            | positive      | 45            | 2           | Primary              |
| 201751324        | invasive mammary carcinoma            | negative      | 0             | negative      | 0             | 3           | Primary              |
| 201751325        | invasive mammary carcinoma            | negative      | 0             | None          | None          | 3           | Primary              |
| 201751328        | invasive lobular carcinoma            | positive      | 98            | positive      | 98            | 0           | Primary              |
| 201751562        | invasive lobular carcinoma            | positive      | 98            | positive      | 98            | 0           | Primary              |
| 201751563        | invasive carcinoma of no special type | positive      | 90            | negative      | 0             | 2           | Primary              |
| 201751681        | invasive carcinoma of no special type | positive      | 98            | positive      | 8             | 0           | Primary              |
| 201751684        | mucinous carcinoma                    | positive      | 95            | positive      | 5             | 1           | Primary              |
| 201751689        | solid papillary carcinoma             | positive      | 98            | positive      | 98            | None        | Primary              |
| 201751704        | invasive carcinoma of no special type | positive      | 98            | positive      | 98            | 2           | Primary              |
| 201751910        | invasive carcinoma of no special type | negative      | 0             | negative      | 0             | 2           | Primary              |
| 201752083        | invasive carcinoma of no special type | positive      | 97            | positive      | 10            | 1           | Primary              |
| 201752134        | invasive carcinoma of no special type | positive      | 65            | positive      | 45            | 0           | Primary              |
| 201752136        | invasive carcinoma of no special type | positive      | 80            | negative      | 0             | 2           | Primary              |
| 201752137        | invasive carcinoma of no special type | positive      | 85            | positive      | 90            | 0           | Primary              |
| 201752138        | invasive carcinoma of no special type | positive      | 90            | positive      | 2             | 1           | Primary              |
| 201752333        | mucinous carcinoma                    | positive      | 99            | positive      | 3             | 2           | Primary              |
| 201752338        | invasive carcinoma of no special type | negative      | 0             | negative      | 0             | 0           | Primary              |
| 201752345        | solid papillary carcinoma             | positive      | 95            | positive      | 99            | 0           | Primary              |

| Pathology_Number | Diagnosis                             | ER positivity | ER percentage | PR positivity | PR percentage | Her-2 score | Primary or Recurrent |
|------------------|---------------------------------------|---------------|---------------|---------------|---------------|-------------|----------------------|
| 201752353        | invasive carcinoma of no special type | positive      | 99            | positive      | 15            | 0           | Primary              |
| 201752517        | invasive carcinoma of no special type | negative      | 0             | negative      | 0             | 0           | Primary              |
| 201752518        | invasive carcinoma of no special type | positive      | 90            | positive      | 70            | 1           | Primary              |
| 201752558        | invasive carcinoma of no special type | positive      | 95            | positive      | 1             | 0           | Primary              |
| 201752563        | mucinous carcinoma                    | positive      | 95            | positive      | 95            | 0           | Primary              |
| 201752618        | invasive carcinoma of no special type | positive      | 98            | positive      | 30            | 0           | Primary              |
| 201752620        | invasive carcinoma of no special type | negative      | 0             | negative      | 0             | 1           | Primary              |
| 201752766        | invasive carcinoma of no special type | positive      | 98            | positive      | 98            | 2           | Primary              |
| 201752774        | invasive lobular carcinoma            | negative      | 0             | negative      | 0             | 0           | Primary              |
| 201752776        | invasive carcinoma of no special type | positive      | 90            | positive      | 98            | 2           | Primary              |
| 201753149        | invasive carcinoma of no special type | positive      | 95            | positive      | 98            | 0           | Primary              |
| 201753293        | invasive carcinoma of no special type | positive      | 20            | negative      | 0             | 0           | Primary              |
| 201753297        | mucinous carcinoma                    | positive      | 99            | negative      | 0             | 0           | Primary              |
| 201753317        | invasive carcinoma of no special type | positive      | 98            | positive      | 98            | 0           | Primary              |
| 201753320        | invasive carcinoma of no special type | negative      | 0             | negative      | 0             | 2           | Primary              |
| 201753322        | invasive carcinoma of no special type | positive      | 90            | negative      | 0             | 0           | Primary              |
| 201753356        | invasive carcinoma of no special type | positive      | 99            | negative      | 0             | 1           | Primary              |
| 201753527        | invasive carcinoma of no special type | positive      | 98            | negative      | 0             | 1           | Primary              |
| 201753723        | invasive carcinoma of no special type | positive      | 98            | positive      | 20            | 2           | Primary              |
| 201753968        | mucinous carcinoma                    | positive      | 95            | positive      | 90            | 0           | Primary              |
| 201753969        | invasive carcinoma of no special type | positive      | 70            | positive      | 98            | 3           | Primary              |
| 201753971        | invasive carcinoma of no special type | positive      | 98            | positive      | 98            | 0           | Primary              |
| 201754101        | invasive carcinoma of no special type | positive      | 98            | positive      | 80            | 0           | Primary              |
| 201754103        | invasive carcinoma of no special type | None          | None          | None          | None          | None        | Primary              |
| 201754104        | invasive carcinoma of no special type | positive      | 98            | positive      | 90            | 1           | Primary              |
| 201754364        | invasive carcinoma of no special type | negative      | 0             | negative      | 0             | 2           | Primary              |

| Pathology_Number | Diagnosis                             | ER positivity | ER percentage | PR positivity | PR percentage | Her-2 score | Primary or Recurrent |
|------------------|---------------------------------------|---------------|---------------|---------------|---------------|-------------|----------------------|
| 201754365        | invasive lobular carcinoma            | positive      | 98            | positive      | 98            | 0           | Primary              |
| 201754539        | invasive carcinoma of no special type | negative      | 0             | negative      | 0             | 0           | Primary              |
| 201754726        | invasive carcinoma of no special type | positive      | 95            | positive      | 85            | 1           | Primary              |
| 201754744        | invasive carcinoma of no special type | positive      | 98            | positive      | 55            | 0           | Primary              |
| 201754788        | invasive carcinoma of no special type | negative      | 0             | negative      | 0             | 3           | Primary              |
| 201754789        | invasive carcinoma of no special type | positive      | 99            | positive      | 85            | 2           | Primary              |
| 201754837        | invasive carcinoma of no special type | positive      | 90            | positive      | 5             | 0           | Primary              |
| 201754924        | invasive carcinoma of no special type | positive      | 98            | negative      | 0             | 3           | Primary              |
| 201754928        | invasive carcinoma of no special type | negative      | 0             | negative      | 0             | 3           | Primary              |
| 201754946        | invasive carcinoma of no special type | negative      | 0             | negative      | 0             | 1           | Primary              |
| 201754982        | invasive micropapillary carcinoma     | positive      | 99            | negative      | 0             | 1           | Primary              |
| 201754983        | invasive carcinoma of no special type | positive      | 95            | negative      | 0             | 2           | Primary              |
| 201754984        | invasive carcinoma of no special type | positive      | 99            | positive      | 99            | 0           | Primary              |
| 201754985        | invasive carcinoma of no special type | positive      | 99            | negative      | 0             | 0           | Primary              |
| 201755158        | invasive carcinoma of no special type | positive      | 98            | negative      | 0             | 1           | Primary              |
| 201755160        | invasive carcinoma of no special type | negative      | 0             | negative      | 0             | 3           | Primary              |
| 201755469        | invasive mammary carcinoma            | positive      | 80            | positive      | 20            | 1           | Primary              |
| 201755470        | invasive carcinoma of no special type | positive      | 98            | positive      | 55            | 1           | Primary              |
| 201755474        | invasive carcinoma of no special type | positive      | 98            | None          | None          | 1           | Primary              |
| 201755670        | invasive carcinoma of no special type | negative      | 0             | negative      | 0             | 2           | Primary              |
| 201755671        | invasive carcinoma of no special type | positive      | 98            | negative      | 0             | 2           | Primary              |
| 201755876        | invasive carcinoma of no special type | positive      | 98            | positive      | 90            | 1           | Primary              |
| 201755877        | invasive carcinoma of no special type | positive      | 98            | positive      | 5             | 2           | Primary              |
| 201755878        | invasive carcinoma of no special type | positive      | 98            | positive      | 65            | 2           | Primary              |
| 201755905        | invasive carcinoma of no special type | positive      | 95            | positive      | 55            | 2           | Primary              |

| Pathology_Number | Diagnosis                             | ER positivity | ER percentage | PR positivity | PR percentage | Her-2 score | Primary or Recurrent |
|------------------|---------------------------------------|---------------|---------------|---------------|---------------|-------------|----------------------|
| 201756082        | invasive carcinoma of no special type | positive      | 98            | negative      | 0             | 1           | Primary              |
| 201756086        | invasive carcinoma of no special type | positive      | 98            | positive      | 90            | 1           | Primary              |
| 201756136        | invasive carcinoma of no special type | positive      |               | positive      |               | 3           | Primary              |
| 201756287        | invasive lobular carcinoma            | positive      | 90            | positive      | 55            | 0           | Primary              |
| 201757227        | invasive carcinoma of no special type | positive      | 95            | positive      | 30            | 0           | Primary              |
| 201757233        | invasive carcinoma of no special type | positive      | 99            | negative      | 0             | 0           | Primary              |
| 201757266        | invasive lobular carcinoma            | positive      | 99            | positive      | 2             | 2           | Primary              |
| 201757269        | invasive lobular carcinoma            | positive      | 95            | positive      | 99            | 0           | Primary              |
| 201757464        | invasive lobular carcinoma            | negative      | 0             | None          | None          | 2           | Primary              |
| 201757465        | invasive lobular carcinoma            | negative      | 0             | negative      | 0             | 2           | Primary              |
| 201757468        | invasive carcinoma of no special type | negative      | 0             | negative      | 0             | 3           | Primary              |
| 201757568        | invasive ductal carcinoma             | positive      | 98            | positive      | 2             | 2           | Primary              |
| 201757577        | invasive carcinoma of no special type | positive      | 75            | positive      | 45            | 0           | Primary              |
| 201757788        | invasive carcinoma of no special type | positive      | 98            | positive      | 35            | 2           | Primary              |
| 201757809        | invasive carcinoma of no special type | positive      | 98            | positive      | 95            | 1           | Primary              |
| 201757972        | invasive carcinoma of no special type | positive      | 98            | positive      | 98            | 2           | Recurrent            |
| 201758274        | invasive carcinoma of no special type | positive      | 95            | positive      | 98            | 2           | Primary              |
| 201758275        | invasive carcinoma of no special type | negative      | 0             | negative      | 0             | 3           | Primary              |
| 201758464        | invasive carcinoma of no special type | positive      | 98            | positive      | 98            | 2           | Primary              |
| 201758715        | invasive carcinoma of no special type | negative      | 0             | negative      | 0             | 3           | Primary              |
| 201758717        | invasive carcinoma of no special type | negative      | 0             | negative      | 0             | 3           | Primary              |
| 201758721        | invasive carcinoma of no special type | negative      | 0             | negative      | 0             | 3           | Primary              |
| 201758846        | invasive micropapillary carcinoma     | None          | None          | None          | None          | None        | Primary              |
| 201758996        | invasive carcinoma of no special type | positive      | 98            | positive      | 90            | 0           | Primary              |
| 201759232        | invasive carcinoma of no special type | positive      | 98            | positive      | 80            | 2           | Primary              |
